# Supplementary material for: Analysis of blue and green REACH compliant tattoo inks
Source: Royal Society of Chemistry journal article supplement (doi:10.1039/d4an00793j), 2024-01-01
Supplement: d4an00793j1.pdf [file d4an00793j1.pdf]

## Analysis of blue and green REACH Compliant Tattoo Inks

Kelli Moseman, Sasha Noble, Sage Sanders, John R. Swierk

Binghamton University, Department of Chemistry, Binghamton, NY 13902

|                                                                                                                                               |    |
|-----------------------------------------------------------------------------------------------------------------------------------------------|----|
| 1. Summary Tables .....                                                                                                                       | 6  |
| Table S1. Summary of carrier ink composition determined by NMR spectroscopy .....                                                             | 6  |
| Table S2. Summary of carrier ink composition determined by Raman and XRF spectroscopies .....                                                 | 7  |
| Table S3. Identifying information of tattoo inks analyzed.....                                                                                | 8  |
| 2. NMR data .....                                                                                                                             | 9  |
| 2.1. Intenze GenZ .....                                                                                                                       | 9  |
| <b>Figure S1.</b> $^1\text{H}$ NMR spectrum of Intenze GenZ Light Grass ink distillate in acetonitrile- $\text{d}_3$ .....                    | 9  |
| <b>Figure S2.</b> $^{13}\text{C}$ NMR spectrum of Intenze GenZ Light Grass ink distillate in acetonitrile- $\text{d}_3$ .....                 | 10 |
| <b>Figure S3.</b> $^1\text{H}$ NMR spectrum of Intenze GenZ Light Grass ink pot residue in acetonitrile- $\text{d}_3$ .....                   | 10 |
| <b>Figure S4.</b> $^{13}\text{C}$ NMR spectrum of Intenze GenZ Light Grass ink pot residue in acetonitrile- $\text{d}_3$ .....                | 11 |
| <b>Figure S5.</b> $^1\text{H}$ - $^1\text{H}$ COSY spectrum of Intenze GenZ Light Grass ink pot residue in acetonitrile- $\text{d}_3$ .....   | 12 |
| <b>Figure S6.</b> $^1\text{H}$ - $^{13}\text{C}$ HSQC spectrum of Intenze GenZ Light Grass ink in acetonitrile- $\text{d}_3$ .....            | 13 |
| <b>Figure S7.</b> $^1\text{H}$ NMR spectrum of Intenze GenZ Blue Sky ink distillate in acetonitrile- $\text{d}_3$ .....                       | 14 |
| <b>Figure S8.</b> $^{13}\text{C}$ NMR spectrum of Intenze GenZ Blue Sky ink distillate in acetonitrile- $\text{d}_3$ .....                    | 14 |
| <b>Figure S9.</b> $^1\text{H}$ NMR spectrum of Intenze GenZ Blue Sky ink pot residue in acetonitrile- $\text{d}_3$ .....                      | 15 |
| <b>Figure S10.</b> $^{13}\text{C}$ NMR spectrum of Intenze GenZ Blue Sky in pot residue in acetonitrile- $\text{d}_3$ .....                   | 15 |
| <b>Figure S11.</b> $^1\text{H}$ - $^1\text{H}$ COSY NMR spectrum of Intenze GenZ Blue Sky ink pot residue in acetonitrile- $\text{d}_3$ ..... | 16 |
| <b>Figure S12.</b> $^1\text{H}$ - $^{13}\text{C}$ HSQC spectrum of Intenze GenZ Blue Sky ink pot residue in acetonitrile- $\text{d}_3$ .....  | 17 |
| 2.2 Dynamic Viking .....                                                                                                                      | 18 |

|                                                                                                                                                       |    |
|-------------------------------------------------------------------------------------------------------------------------------------------------------|----|
| <b>Figure S13.</b> $^1\text{H}$ NMR spectrum of Dynamic Platinum Baby Blue ink distillate in acetonitrile- $\text{d}_3$ .....                         | 18 |
| <b>Figure S14.</b> $^{13}\text{C}$ NMR spectrum of Dynamic Platinum Baby Blue ink distillate in acetonitrile- $\text{d}_3$ .....                      | 19 |
| <b>Figure S15.</b> $^1\text{H}$ NMR spectrum of Dynamic Platinum Baby Blue ink pot residue in acetonitrile- $\text{d}_3$ .....                        | 20 |
| <b>Figure S16.</b> $^{13}\text{C}$ NMR spectrum of Dynamic Platinum Baby Blue ink pot residue in acetonitrile- $\text{d}_3$ .....                     | 21 |
| <b>Figure S17.</b> $^1\text{H}$ - $^1\text{H}$ COSY spectrum of Dynamic Platinum Baby Blue ink pot residue in acetonitrile- $\text{d}_3$ .....        | 22 |
| <b>Figure S18.</b> $^1\text{H}$ - $^{13}\text{C}$ HSQC spectrum of Dynamic Platinum Baby Blue ink pot residue in acetonitrile- $\text{d}_3$ .....     | 23 |
| <b>Figure S19.</b> $^1\text{H}$ NMR spectrum of Dynamic Platinum Emerald Green ink distillate in acetonitrile- $\text{d}_3$ .....                     | 24 |
| <b>Figure S21.</b> $^1\text{H}$ NMR spectrum of Dynamic Platinum Emerald Green ink pot residue in acetonitrile- $\text{d}_3$ .....                    | 25 |
| <b>Figure S22.</b> $^{13}\text{C}$ NMR spectrum of Dynamic Platinum Emerald Green ink pot residue in acetonitrile- $\text{d}_3$ .....                 | 26 |
| <b>Figure S23.</b> $^1\text{H}$ - $^1\text{H}$ COSY spectrum of Dynamic Platinum Emerald Green ink pot residue in acetonitrile- $\text{d}_3$ .....    | 27 |
| <b>Figure S24.</b> $^1\text{H}$ - $^{13}\text{C}$ HSQC spectrum of Dynamic Platinum Emerald Green ink pot residue in acetonitrile- $\text{d}_3$ ..... | 28 |
| 2.3 Quantum Ink .....                                                                                                                                 | 29 |
| <b>Figure S25.</b> $^1\text{H}$ NMR spectrum of Quantum Ink Grover distillate in acetonitrile- $\text{d}_3$ ..                                        | 29 |
| <b>Figure S26.</b> $^{13}\text{C}$ NMR spectrum of Quantum Ink Grover distillate in acetonitrile- $\text{d}_3$ ..                                     | 29 |
| <b>Figure S27.</b> $^1\text{H}$ NMR spectrum of Quantum Ink Grover pot residue in acetonitrile- $\text{d}_3$ .....                                    | 30 |
| <b>Figure S28.</b> $^{13}\text{C}$ NMR spectrum of Quantum Ink Grover pot residue in acetonitrile- $\text{d}_3$ .....                                 | 30 |
| <b>Figure S29.</b> $^1\text{H}$ - $^1\text{H}$ COSY spectrum of Quantum Ink Grover pot residue in acetonitrile- $\text{d}_3$ .....                    | 31 |
| <b>Figure S30.</b> $^1\text{H}$ - $^{13}\text{C}$ HSQC spectrum of Quantum Ink Grover pot residue in acetonitrile- $\text{d}_3$ .....                 | 32 |
| <b>Figure S31.</b> $^1\text{H}$ NMR spectrum of Quantum Ink Pickle Juice distillate in acetonitrile- $\text{d}_3$ .....                               | 33 |
| <b>Figure S32.</b> $^{13}\text{C}$ NMR spectrum of Quantum Ink Pickle Juice distillate in acetonitrile- $\text{d}_3$ .....                            | 33 |

|                                                                                                                                          |    |
|------------------------------------------------------------------------------------------------------------------------------------------|----|
| <b>Figure S33.</b> $^1\text{H}$ NMR spectrum of Quantum Ink Pickle Juice pot residue in acetonitrile- $\text{d}_3$ .....                 | 34 |
| <b>Figure S34.</b> $^{13}\text{C}$ NMR spectrum of Quantum Ink Pickle Juice pot residue in acetonitrile- $\text{d}_3$ .....              | 34 |
| <b>Figure S35.</b> $^1\text{H}$ - $^1\text{H}$ COSY spectrum of Quantum Pickle Juice pot residue in acetonitrile- $\text{d}_3$ .....     | 35 |
| <b>Figure S36.</b> $^1\text{H}$ - $^{13}\text{C}$ HSQC spectrum of Quantum Pickle Juice pot residue in acetonitrile- $\text{d}_3$ .....  | 36 |
| 2.4 Xtreme Ink .....                                                                                                                     | 37 |
| <b>Figure S37.</b> $^1\text{H}$ NMR spectrum of Xtreme Ink Azure distillate in acetonitrile- $\text{d}_3$ .....                          | 37 |
| <b>Figure S38.</b> $^{13}\text{C}$ NMR spectrum of Xtreme Ink Azure distillate in acetonitrile- $\text{d}_3$ .....                       | 37 |
| <b>Figure S39.</b> $^1\text{H}$ NMR spectrum of Xtreme Ink Azure pot residue in acetonitrile- $\text{d}_3$ .....                         | 38 |
| <b>Figure S40.</b> $^{13}\text{C}$ NMR spectrum of Xtreme Ink Azure pot residue in acetonitrile- $\text{d}_3$ .....                      | 38 |
| <b>Figure S41.</b> $^1\text{H}$ - $^1\text{H}$ COSY spectrum of Xtreme Ink Azure pot residue in acetonitrile- $\text{d}_3$ .....         | 39 |
| <b>Figure S42.</b> $^1\text{H}$ - $^{13}\text{C}$ HSQC spectrum of Xtreme Ink Azure pot residue in acetonitrile- $\text{d}_3$ .....      | 40 |
| <b>Figure S43.</b> $^1\text{H}$ NMR spectrum of Xtreme Ink Lime Green distillate in acetonitrile- $\text{d}_3$ .....                     | 41 |
| <b>Figure S44.</b> $^{13}\text{C}$ NMR spectrum of Xtreme Ink Lime Green distillate in acetonitrile- $\text{d}_3$ .....                  | 41 |
| <b>Figure S45.</b> $^1\text{H}$ NMR spectrum of Xtreme Ink Lime Green pot residue in acetonitrile- $\text{d}_3$ .....                    | 42 |
| <b>Figure S46.</b> $^{13}\text{C}$ NMR spectrum of Xtreme Ink Lime Green pot residue in acetonitrile- $\text{d}_3$ .....                 | 42 |
| <b>Figure S47.</b> $^1\text{H}$ - $^1\text{H}$ COSY spectrum of Xtreme Ink Lime Green pot residue in acetonitrile- $\text{d}_3$ .....    | 43 |
| <b>Figure S48.</b> $^1\text{H}$ - $^{13}\text{C}$ HSQC spectrum of Xtreme Ink Lime Green pot residue in acetonitrile- $\text{d}_3$ ..... | 44 |
| 2.5 BioTek .....                                                                                                                         | 45 |
| <b>Figure S49.</b> $^1\text{H}$ NMR spectrum of BioTek Deep Ocean ink distillate in acetonitrile- $\text{d}_3$ .....                     | 45 |
| <b>Figure S50.</b> $^{13}\text{C}$ NMR spectrum of BioTek Deep Ocean ink distillate in acetonitrile- $\text{d}_3$ .....                  | 45 |
| <b>Figure S51.</b> $^1\text{H}$ NMR spectrum of BioTek Deep Ocean ink pot residue in acetonitrile- $\text{d}_3$ .....                    | 46 |

|                                                                                                                                          |    |
|------------------------------------------------------------------------------------------------------------------------------------------|----|
| <b>Figure S52.</b> $^{13}\text{C}$ NMR spectrum of BioTek Deep Ocean ink pot residue in acetonitrile- $\text{d}_3$ .....                 | 47 |
| <b>Figure S53.</b> $^1\text{H}$ - $^1\text{H}$ COSY spectrum of BioTek Deep Ocean ink pot residue in acetonitrile- $\text{d}_3$ .....    | 47 |
| <b>Figure S54.</b> $^1\text{H}$ - $^{13}\text{C}$ HSQC spectrum of BioTek Deep Ocean ink pot residue in acetonitrile- $\text{d}_3$ ..... | 48 |
| <b>Figure S55.</b> $^1\text{H}$ NMR spectrum of BioTek Green ink distillate in acetonitrile- $\text{d}_3$ .....                          | 49 |
| <b>Figure S56.</b> $^{13}\text{C}$ NMR spectrum of BioTek Green ink distillate in acetonitrile- $\text{d}_3$ .....                       | 49 |
| <b>Figure S57.</b> $^1\text{H}$ NMR spectrum of BioTek Green ink pot residue in acetonitrile- $\text{d}_3$ .....                         | 50 |
| <b>Figure S58.</b> $^{13}\text{C}$ NMR spectrum of BioTek Green ink pot residue in acetonitrile- $\text{d}_3$ .....                      | 51 |
| <b>Figure S59.</b> $^1\text{H}$ - $^1\text{H}$ COSY spectrum of BioTek Green ink pot residue in acetonitrile- $\text{d}_3$ .....         | 52 |
| <b>Figure S60.</b> $^1\text{H}$ - $^{13}\text{C}$ HSQC spectrum of BioTek Green ink pot residue in acetonitrile- $\text{d}_3$ .....      | 53 |
| 3. Raman data .....                                                                                                                      | 54 |
| 3.1 Intenze GenZ .....                                                                                                                   | 54 |
| <b>Figure S61.</b> Raman spectrum of Intenze GenZ Light Grass ink.....                                                                   | 54 |
| <b>Figure S62.</b> Raman spectrum of Intenze GenZ Blue Sky ink.....                                                                      | 55 |
| 3.2 Dynamic Viking .....                                                                                                                 | 56 |
| <b>Figure S63.</b> Raman spectrum of Dynamic Platinum Baby Blue ink.....                                                                 | 56 |
| <b>Figure S64.</b> Raman spectrum of Dynamic Platinum Emerald Green ink.....                                                             | 57 |
| 3.3 Quantum Ink .....                                                                                                                    | 58 |
| <b>Figure S65.</b> Raman spectrum of Quantum Ink Grover .....                                                                            | 58 |
| <b>Figure S66.</b> Raman spectrum of Quantum Ink Pickle Juice .....                                                                      | 59 |
| 3.4 Xtreme Ink.....                                                                                                                      | 60 |
| <b>Figure S67.</b> Raman spectrum of Xtreme Ink Azure .....                                                                              | 60 |
| <b>Figure S68.</b> Raman spectrum of Xtreme Ink Lime Green .....                                                                         | 61 |
| 3.5 BioTek .....                                                                                                                         | 62 |
| <b>Figure S69.</b> Raman spectrum of BioTek Green ink .....                                                                              | 62 |
| <b>Figure S70.</b> Raman spectrum of BioTek Deep Ocean ink.....                                                                          | 63 |
| 3.6 Standard Pigments .....                                                                                                              | 64 |
| <b>Figure S71.</b> Raman spectrum of Alkali Blue (C.I. 42765) pigment.....                                                               | 64 |
| 4. XRF data .....                                                                                                                        | 65 |
| 4.1 Intenze GenZ .....                                                                                                                   | 65 |

|                                                                             |    |
|-----------------------------------------------------------------------------|----|
| <b>Figure S72.</b> XRF spectrum of Intenze GenZ Light Grass ink .....       | 65 |
| <b>Figure S73.</b> XRF spectrum of Intenze GenZ Blue Sky ink .....          | 66 |
| 4.2 Dynamic Viking .....                                                    | 67 |
| <b>Figure S74.</b> XRF spectrum of Dynamic Platinum Baby Blue ink .....     | 67 |
| <b>Figure S75.</b> XRF spectrum of Dynamic Platinum Emerald Green ink ..... | 68 |
| 4.3 Quantum Ink .....                                                       | 69 |
| <b>Figure S76.</b> XRF spectrum of Quantum Ink Grover .....                 | 69 |
| <b>Figure S77.</b> XRF spectrum of Quantum Ink Pickle Juice .....           | 70 |
| 4.4 Xtreme Ink.....                                                         | 71 |
| <b>Figure S78.</b> XRF spectrum of Xtreme Ink Azure .....                   | 71 |
| <b>Figure S79.</b> XRF spectrum of Xtreme Ink Lime Green.....               | 72 |
| 4.5 BioTek.....                                                             | 73 |
| <b>Figure S80.</b> XRF spectrum of BioTek Green.....                        | 73 |
| <b>Figure S81.</b> XRF spectrum of BioTek Deep Ocean.....                   | 74 |

# 1. Summary Tables

Table S1. Summary of carrier ink composition determined by NMR spectroscopy

| Brand            | Name          | Reported Composition                                                                                                                            | Observed Composition                                                                                            |
|------------------|---------------|-------------------------------------------------------------------------------------------------------------------------------------------------|-----------------------------------------------------------------------------------------------------------------|
| Intenze GenZ     | Light Grass   | water (aqua), Hamamelis Virginiana Extract, ammonium acrylates copolymer, glycerin, ethanol                                                     | water, ethanol, polyethylene glycol, 1,3-butanediol                                                             |
|                  | Blue Sky      | water (aqua), Hamamelis Virginiana Extract, ammonium acrylates copolymer, glycerin, ethanol                                                     | water, ethanol, 1,3-butanediol, propylene glycol, unidentified long-chain alkane (Figure S9-12)                 |
| Dynamic Platinum | Baby Blue     | aqua, glycerin, butylene glycol, Hamamelis Water                                                                                                | water, propylene glycol, glycerol, polyethylene glycol, unidentified long-chain alkane (Figure S15-18)          |
|                  | Emerald Green | distilled water, glycerin, butylene glycol, Hamamelis Water                                                                                     | water, isopropanol, propylene glycol, polyethylene glycol, glycerol                                             |
| Quantum Ink      | Grover        | glycerin, ethanol, aqua                                                                                                                         | glycerol, ethanol, water                                                                                        |
|                  | Pickle Juice  | glycerin, ethanol, aqua                                                                                                                         | glycerol, ethanol, water, polyethylene glycol                                                                   |
| Xtreme Ink       | Azure         | no composition listed on bottle                                                                                                                 | water, ethanol, glycerol, polyethylene glycol, propylene glycol, unidentified long-chain alkane (Figure S39-42) |
|                  | Lime Green    | no composition listed on bottle                                                                                                                 | water, ethanol, propylene glycol, polyethylene glycol, glycerol, unidentified long-chain alkane (S45-48)        |
| BioTek           | Green         | alcohol, glycerin, aqua, propylene glycol, ricin oil, polysorbate 20, magnesium aluminum silicate*, PVP, Aloe Barbadensis, Hamamelis Virginiana | water, ethanol, propylene glycol, glycerol, polyethylene glycol                                                 |

|            |                                                                                                                                        |                                                                 |
|------------|----------------------------------------------------------------------------------------------------------------------------------------|-----------------------------------------------------------------|
| Deep Ocean | glycerin, propylene glycol, Hamamelis Virginiana, aqua, Polysorbate 20, magnesium aluminum silicate*, PVP, ricin oil, Aloe Barbadensis | water, ethanol, propylene glycol, glycerol, polyethylene glycol |
|------------|----------------------------------------------------------------------------------------------------------------------------------------|-----------------------------------------------------------------|

*\*not possible to detect by NMR spectroscopy*

Table S2. Summary of carrier ink composition determined by Raman and XRF spectroscopies

| Brand            | Name          | Reported Pigments                                                                      | Pigments Observed by Raman          | Elements Observed by XRF (Likely pigment in parentheses) |
|------------------|---------------|----------------------------------------------------------------------------------------|-------------------------------------|----------------------------------------------------------|
| Intenze GenZ     | Light Grass   | C.I.13980 (PY151), C.I. 69800 (PB60), C.I. 77891 (PW6)                                 | C.I. 69800 (PB60)                   | Ti (PW6)                                                 |
|                  | Blue Sky      | C.I. 77891 (PW6), C.I.69800 (PB60)                                                     | C.I. 69800 (PB60)                   | Ti (PW6)                                                 |
| Dynamic Platinum | Baby Blue     | C.I. 77891 (PW6), C.I. 42090 (FD&C Blue No. 1)                                         | C.I. 74260 (PG7)                    | Cu (PG7), Ti (PW6)                                       |
|                  | Emerald Green | C.I. 77891 (PW6), C.I. 19140 (tartrazine, FD&C Yellow 5), C.I. 42090 (FD&C Blue No. 1) | C.I. 74260 (PG7)                    | Cu (PG7), Ti (PW6)                                       |
| Quantum Ink      | Grover        | C.I. 77891 (PW6), C.I. 42765 (alkali blue)                                             | C.I. 42765 (alkali blue)            | Ti (PW6)                                                 |
|                  | Pickle Juice  | C.I. 21290 (PY180), C.I. 74265 (PG36)                                                  | C.I. 74260 (PG7), C.I. 11741 (PY74) | Cu (PG7)                                                 |
| Xtreme Ink       | Azure         | C.I. 77891 (PW6), C.I. 69800 (PB60)                                                    | C.I. 74160 (PB15:1/6)               | Cu (PB15), Ti (PW6)                                      |
|                  | Lime Green    | C.I. 77891 (PW6), C.I. 77491 (red iron oxide), C.I. 200310 (PY155)                     | C.I. 74260 (PG7)                    | Cu (PG7), Ti (PW6)                                       |

|        |            |                                       |                                  |                     |
|--------|------------|---------------------------------------|----------------------------------|---------------------|
| BioTek | Green      | C.I.77288 (Chromium oxide green)      | C.I.77288 (Chromium oxide green) | Cr (chromium oxide) |
|        | Deep Ocean | C.I. 74160 (PB15:1), C.I. 77891 (PW6) | C.I. 74160 (PB15:1/6)            | Cu (PB15)           |

Table S3. Identifying information of tattoo inks analyzed

| Brand          | Name          | Lot          | Batch                           | Ref                     | Article    |
|----------------|---------------|--------------|---------------------------------|-------------------------|------------|
| Intenze GenZ   | Light Grass   | SS327        | EU151004EUB6000<br>4EUW003IMX40 | 1036C50823D2<br>5080417 | ST1508GZLG |
|                | Blue Sky      | SS323        | EUW003EUB60001I<br>MX40         | 1053C04422M0<br>5090186 | ST1044BS   |
| Dynamic Viking | Baby Blue     | BB-004-D1    |                                 |                         |            |
|                | Emerald Green | EG-002-D1    |                                 |                         |            |
| Quantum Ink    | Grover        | #Q013        |                                 |                         |            |
|                | Pickle Juice  | #Q013        |                                 |                         |            |
| Xtreme Ink     | Azure         |              | U2H12                           |                         |            |
|                | Lime Green    |              | U2H12                           |                         |            |
| BioTek         | Green         | EU0ECS-25D22 |                                 |                         |            |



## 2. NMR data

### 2.1. Intenze GenZ

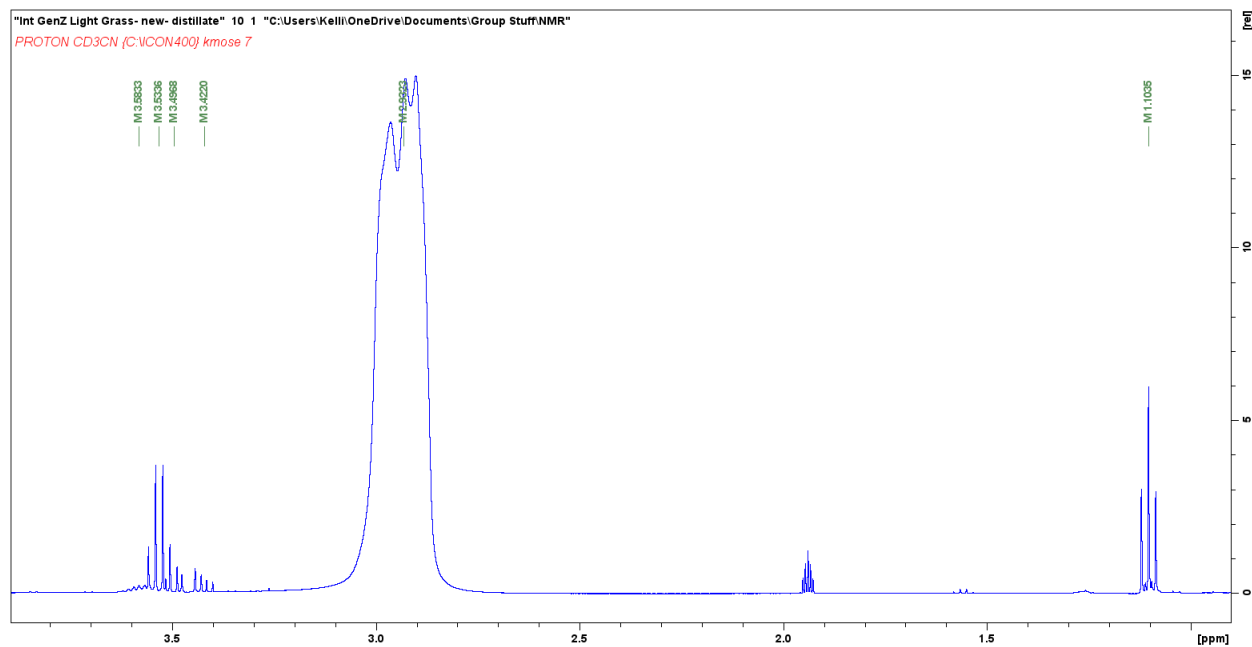

**Figure S1.**  $^1\text{H}$  NMR spectrum of Intenze GenZ Light Grass ink distillate in acetonitrile- $d_3$

Signals at  $\delta$ 1.1035 ppm and  $\delta$ 3.5336 ppm are characteristic of ethanol. The broad signal at  $\delta$ 2.9323 ppm is produced by water. Singals at  $\delta$ 3.4220,  $\delta$ 3.4968 ppm, and  $\delta$ 3.5833 ppm are produced by glycerol. The acetonitrile solvent peak is located at  $\delta$ 1.94 ppm.

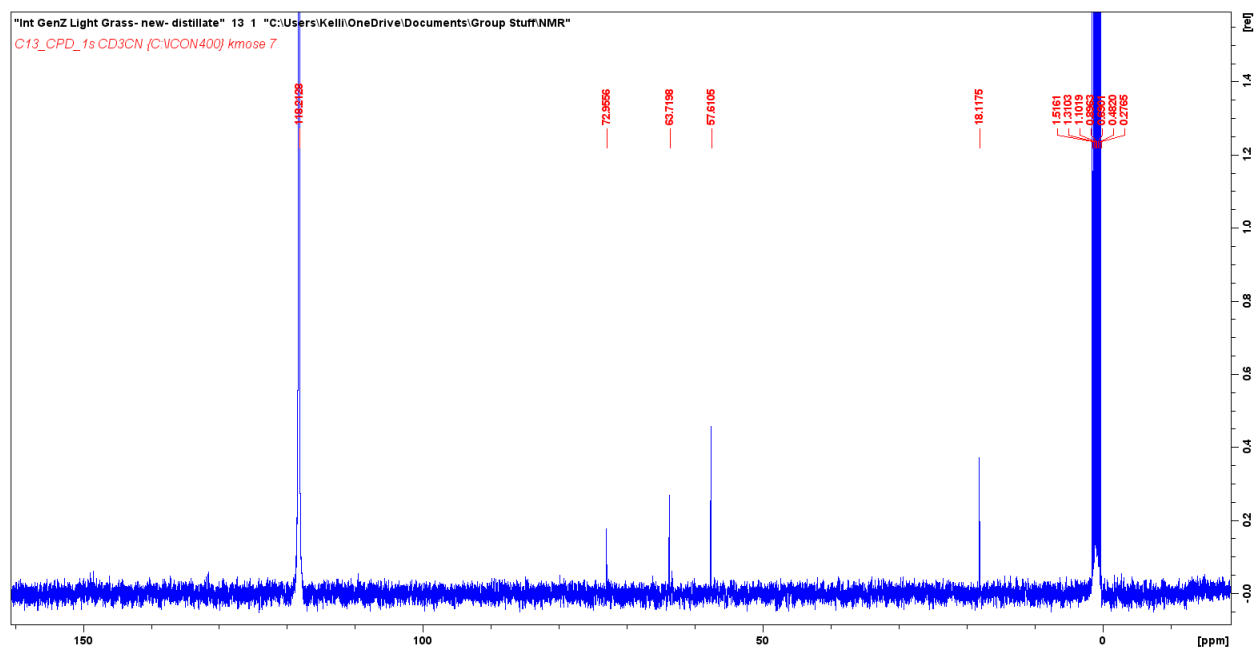

**Figure S2.**  $^{13}\text{C}$  NMR spectrum of Intenze GenZ Light Grass ink distillate in acetonitrile- $d_3$

Peaks at  $\delta 18.1175$  ppm and  $\delta 57.6105$  ppm are produced by ethanol. Glycerol peaks appear at  $\delta 63.7198$  ppm and  $\delta 72.9556$  ppm. The solvent peak for acetonitrile is found around  $\delta 0.89$  ppm and  $\delta 118$  ppm.

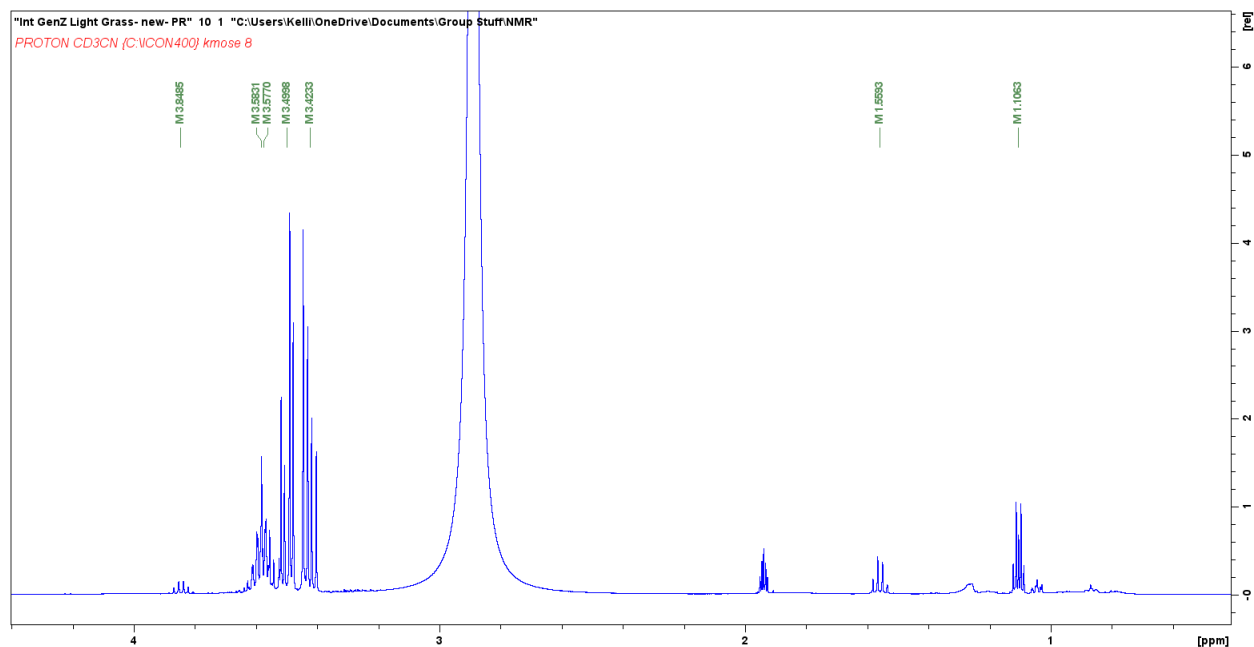

**Figure S3.**  $^1\text{H}$  NMR spectrum of Intenze GenZ Light Grass ink pot residue in acetonitrile- $d_3$

Signals at  $\delta 3.4233$  ppm,  $\delta 3.4998$  ppm, and  $\delta 3.5770$  ppm are consistent with glycerol being present in this ink. A peak at  $\delta 3.5831$  ppm is likely produced by polyethylene glycol. The signals

at  $\delta$ 1.1063 ppm,  $\delta$ 1.5593 ppm, and  $\delta$ 3.8485 ppm are consistent with 1,3-butanediol. The peaks at  $\delta$ 2.90 ppm and  $\delta$ 1.94 ppm are produced by water and acetonitrile, respectively.

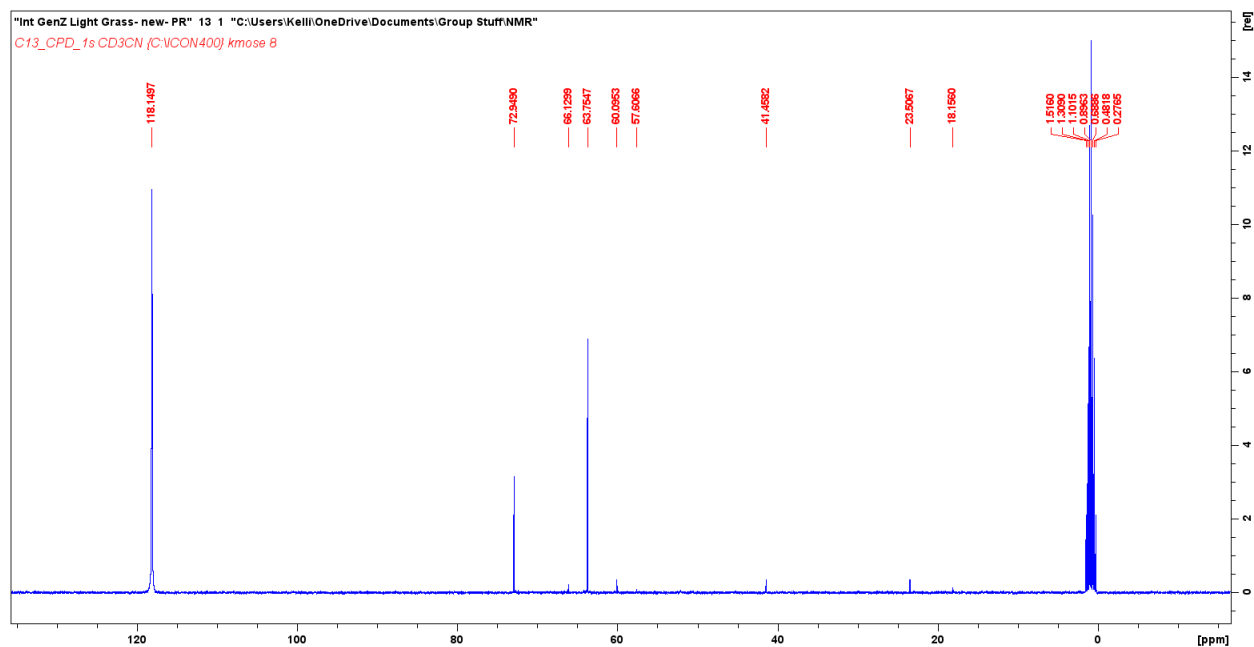

**Figure S4.**  $^{13}\text{C}$  NMR spectrum of Intenze GenZ Light Grass ink pot residue in acetonitrile- $d_3$

Signals at  $\delta$ 63.7547 ppm and  $\delta$ 72.9490 ppm are consistent with glycerol being in this ink. Signals at  $\delta$ 23.5067 ppm,  $\delta$ 41.4582 ppm,  $\delta$ 60.0953 ppm, and  $\delta$ 66.1299 ppm support 1,3-butanediol being present. Small amounts of ethanol produce the signals at  $\delta$ 18.1560 ppm and  $\delta$ 57.6066 ppm. The remaining peaks are produced by the solvent.

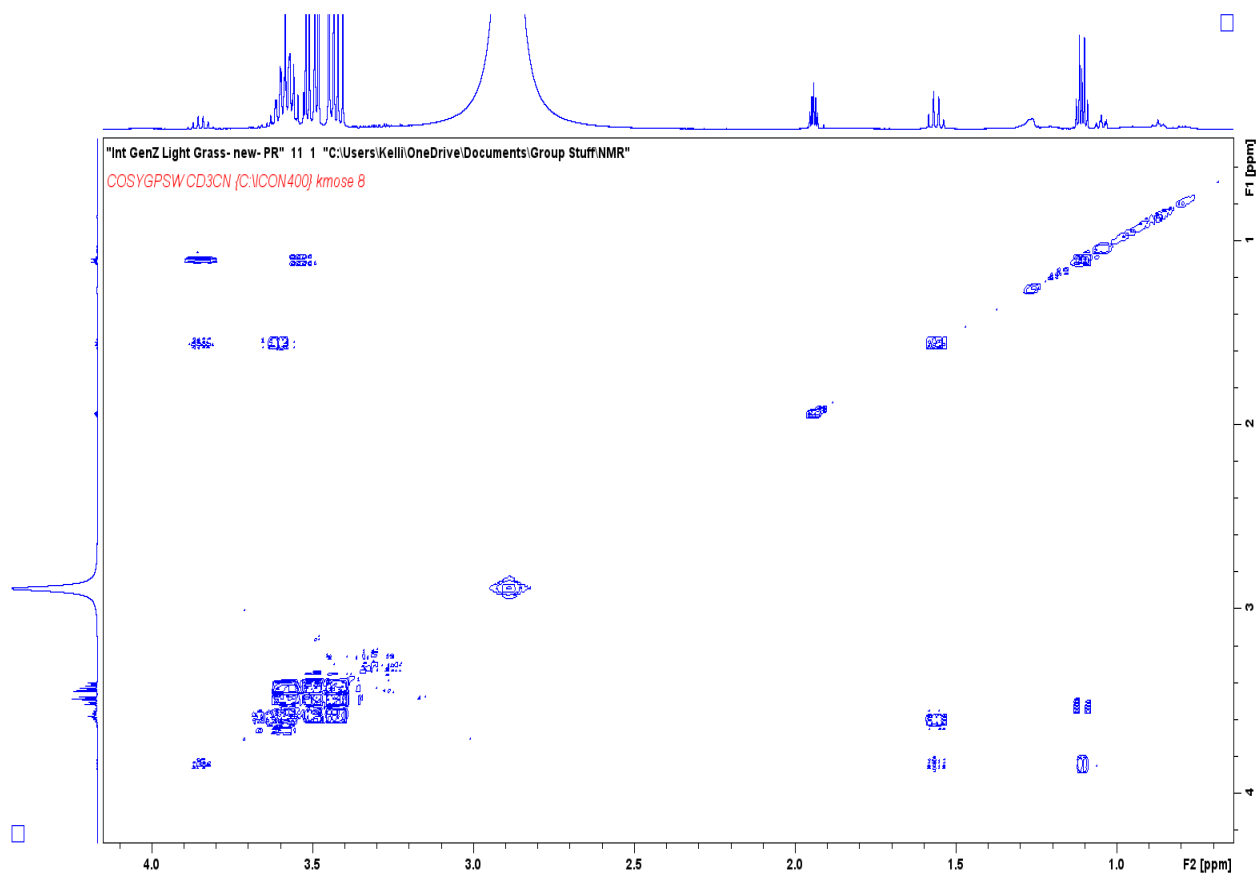

**Figure S5.**  $^1\text{H}$ - $^1\text{H}$  COSY spectrum of Intenze GenZ Light Grass ink pot residue in acetonitrile- $d_3$ . Coupling occurring between peaks at  $\delta$ 1.1063 ppm,  $\delta$ 1.5593 ppm,  $\delta$ 3.8485 ppm and a peak slightly downfield of  $\delta$ 3.5831 ppm support 1,3-butanediol being present in this ink. Additionally, coupling occurs between peaks at  $\delta$ 3.4233 ppm,  $\delta$ 3.4998 ppm, and  $\delta$ 3.5770 ppm, indicating the presence of glycerol.

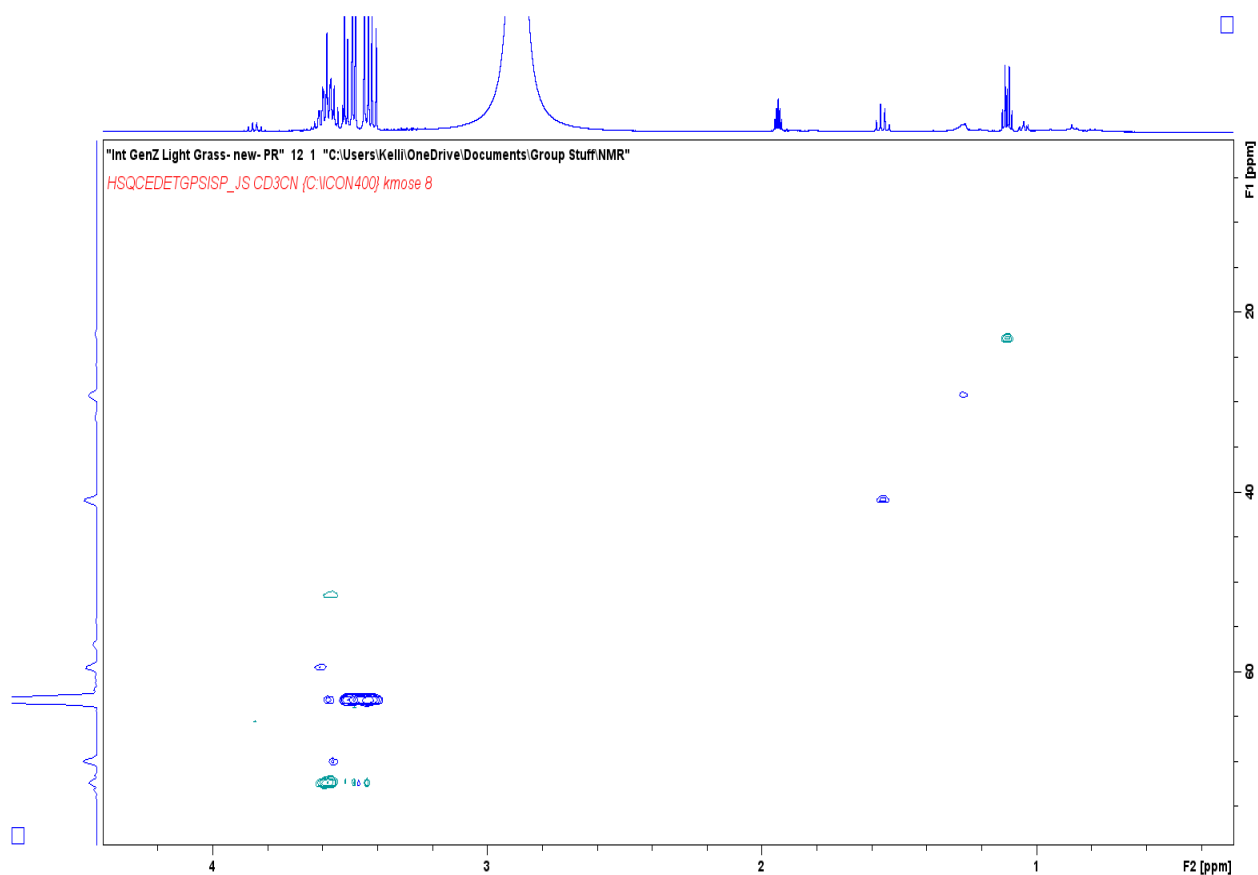

**Figure S6.**  $^1\text{H}$ - $^{13}\text{C}$  HSQC spectrum of Intenze GenZ Light Grass ink in acetonitrile- $d_3$

Coupling between the signals at  $\delta 1.1063$  ppm and  $\delta 23.5067$  ppm,  $\delta 1.5593$  ppm and  $\delta 41.4582$  ppm, and  $\delta 3.8485$  ppm and  $\delta 66.1299$  ppm is consistent with 1,3-butanediol. Additionally, coupling occurs between the  $^{13}\text{C}$  peak at  $\delta 60.0953$  ppm and a signal slightly downfield of  $\delta 3.5831$  ppm which further supports 1,3-butanediol being present. Coupling between  $^1\text{H}$  peaks at  $\delta 3.4233$  ppm,  $\delta 3.4998$  ppm, and  $\delta 3.5770$  ppm and  $^{13}\text{C}$  peaks at  $\delta 63.7547$  ppm and  $\delta 72.9490$  ppm support glycerol being present in the ink. Lastly, there appears to be coupling between a  $^1\text{H}$  peak at around  $\delta 3.5831$  ppm and a  $^{13}\text{C}$  peak at  $\delta 70$  ppm which is typical of polyethylene glycol being present. This cannot be confirmed due to the significant overlapping of the peaks.

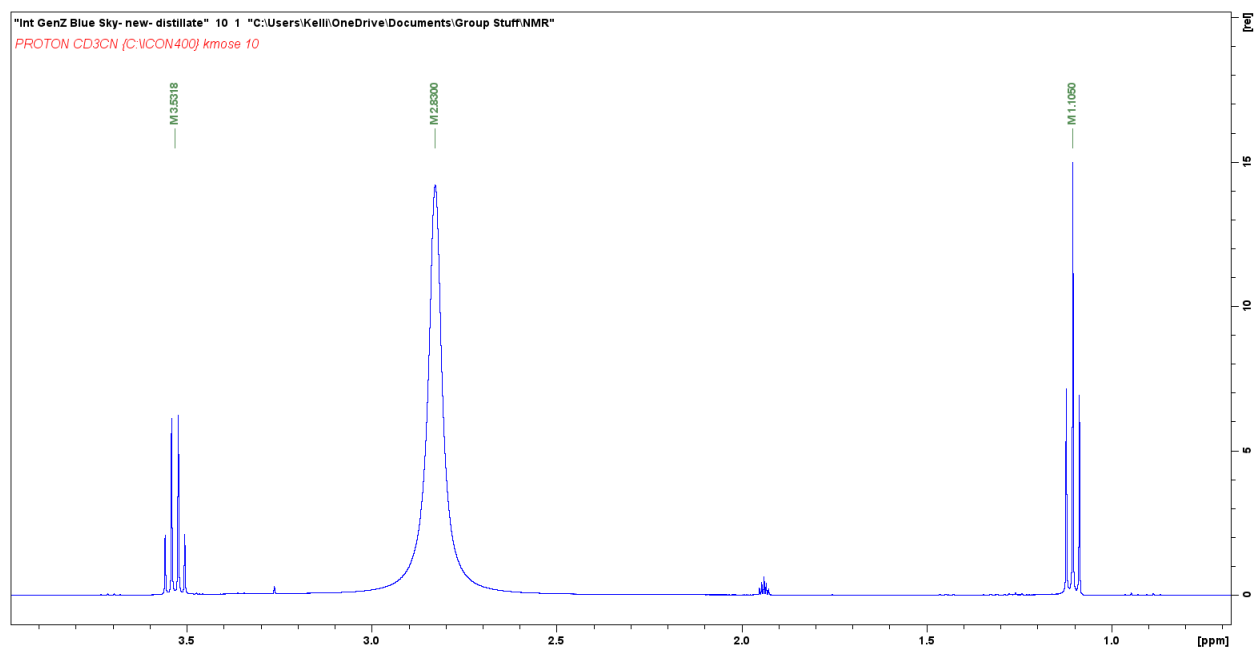

**Figure S7.**  $^1\text{H}$  NMR spectrum of Intenze GenZ Blue Sky ink distillate in acetonitrile- $d_3$ . Peaks at  $\delta 1.1050$  ppm and  $\delta 3.5318$  ppm are produced by ethanol. Water produces the broad peak at  $\delta 2.8300$  ppm. The solvent appears at  $\delta 1.94$  ppm.

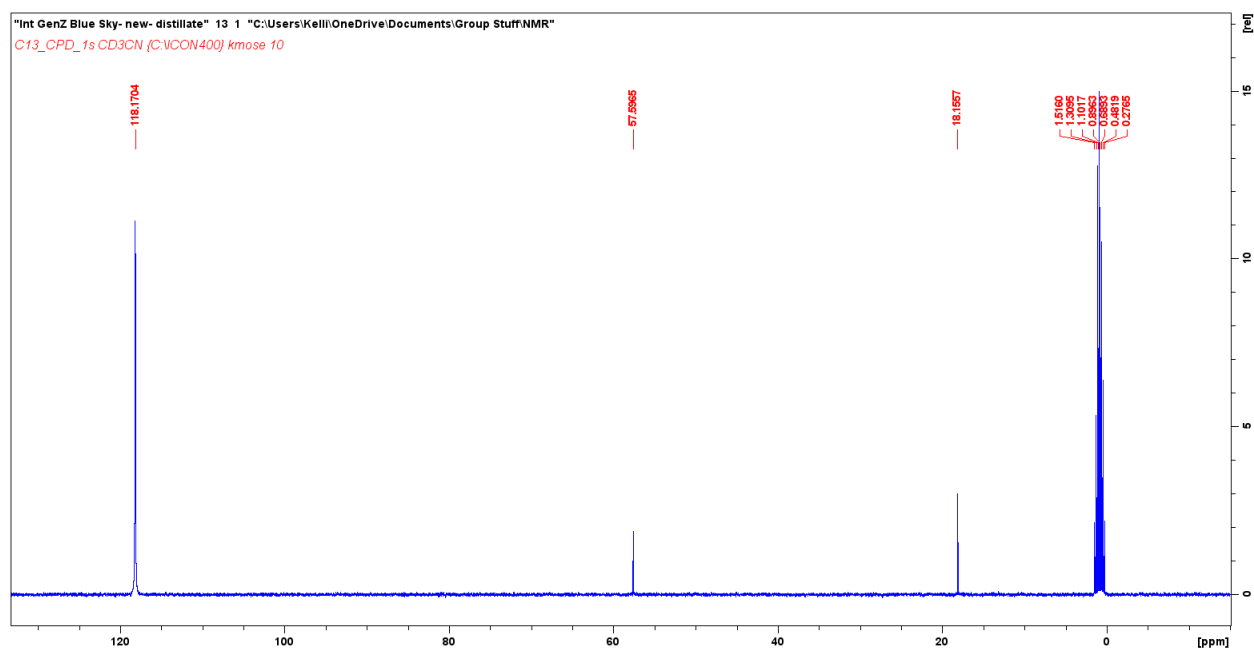

**Figure S8.**  $^{13}\text{C}$  NMR spectrum of Intenze GenZ Blue Sky ink distillate in acetonitrile- $d_3$ . Ethanol produces the peaks at  $\delta 18.1557$  ppm and  $\delta 57.5965$  ppm. The remaining peaks are produced by the solvent.

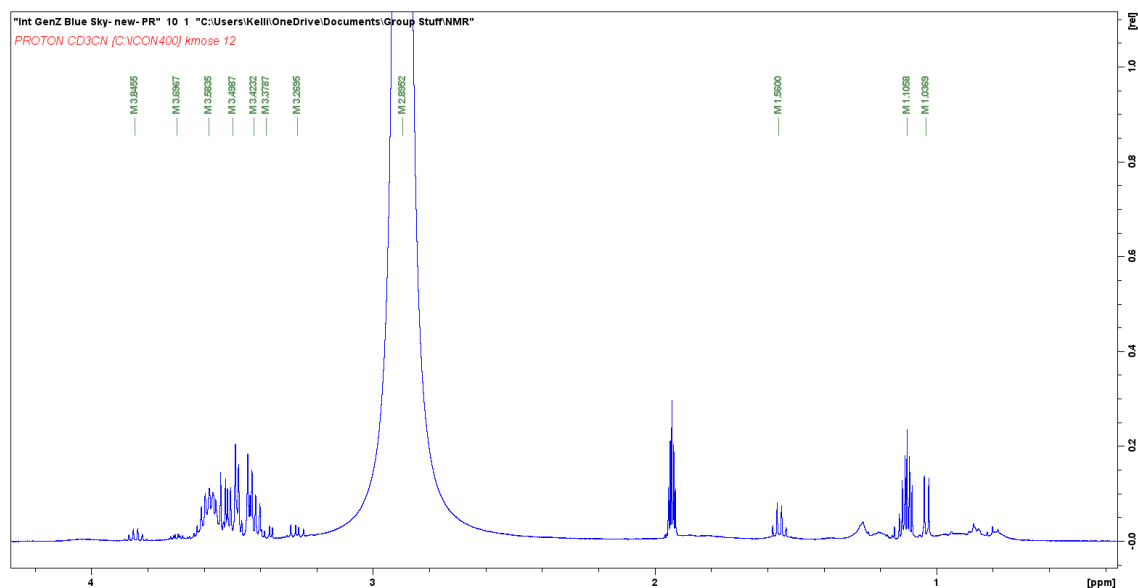

**Figure S9.**  $^1\text{H}$  NMR spectrum of Intenze GenZ Blue Sky ink pot residue in acetonitrile- $d_3$ . Peaks at  $\delta$ 1.0369 ppm,  $\delta$ 3.2695 ppm,  $\delta$ 3.3787 ppm, and  $\delta$ 3.6967 ppm are attributed to small amounts of propylene glycol. 1,3-butanediol likely produces the peaks at  $\delta$ 1.1058 ppm,  $\delta$ 1.5600 ppm,  $\delta$ 3.8455 ppm, while glycerol produces ones at  $\delta$ 3.4232 ppm,  $\delta$ 3.4987 ppm, and  $\delta$ 3.5853 ppm. Water and the solvent produce signals at  $\delta$ 2.90 ppm and  $\delta$  1.94 ppm, respectively. Small peaks around  $\delta$ 0.81 ppm and  $\delta$ 1.26 ppm may be due to the presence of a long-chain alkane.

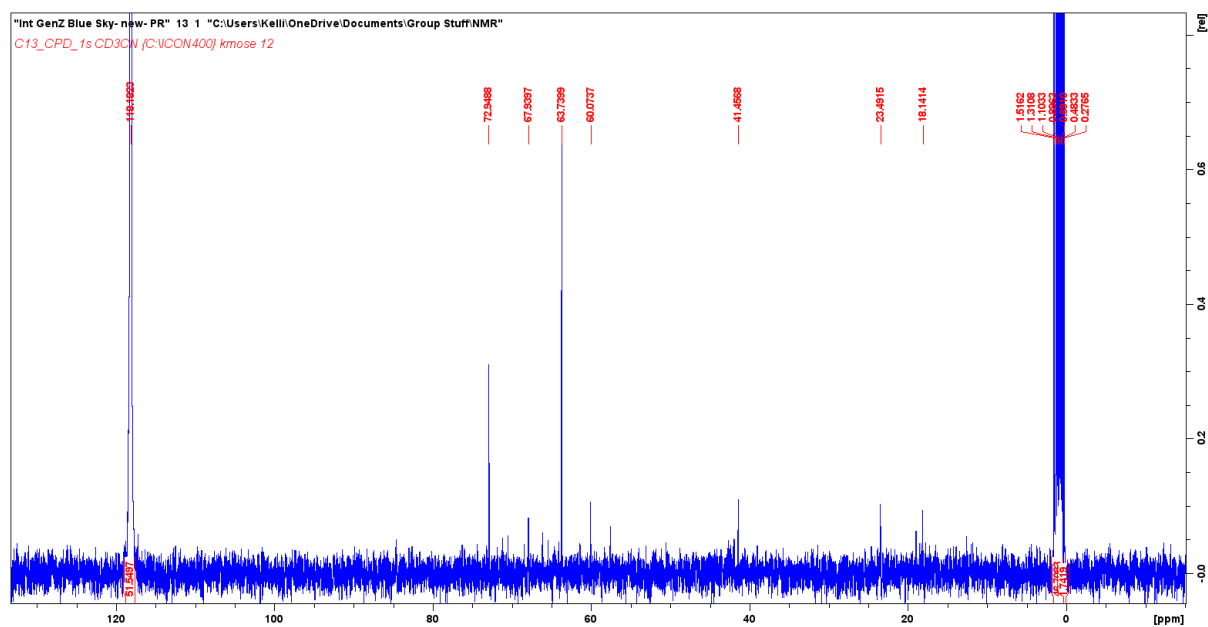

**Figure S10.**  $^{13}\text{C}$  NMR spectrum of Intenze GenZ Blue Sky ink pot residue in acetonitrile- $d_3$ . Peaks appearing at  $\delta$ 63.7399 ppm and  $\delta$ 72.9488 ppm are produced by glycerol. Peaks at  $\delta$ 23.4915 ppm,  $\delta$ 41.4568 ppm,  $\delta$ 60.0737 ppm, and  $\delta$ 67.9397 ppm support the presence of 1,3-butanediol. A peak at  $\delta$ 18.1414 ppm is likely from propylene glycol, although the two corresponding peaks around  $\delta$ 68 ppm do not appear.

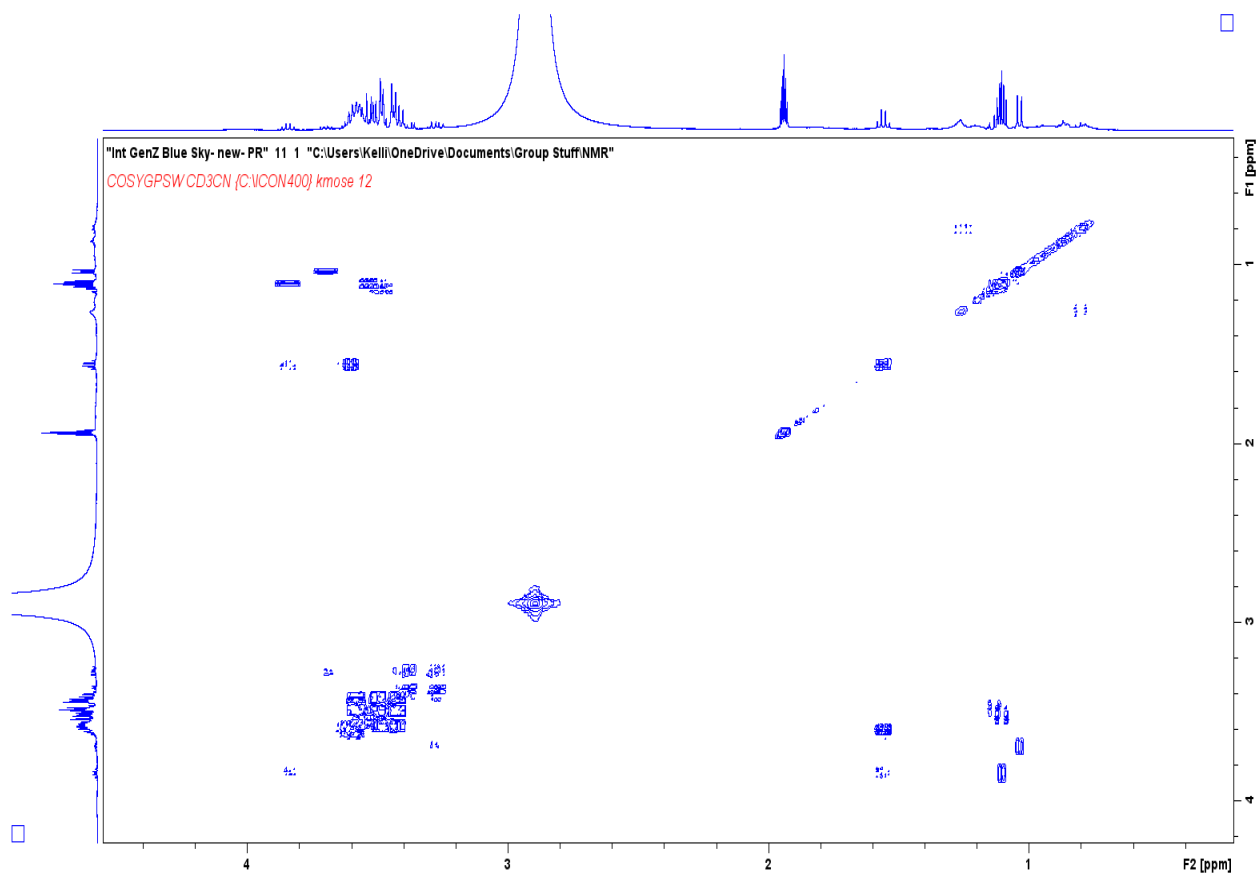

**Figure S11.**  $^1\text{H}$ - $^1\text{H}$  COSY NMR spectrum of Intenze GenZ Blue Sky ink pot residue in acetonitrile- $d_3$

Peaks at  $\delta$ 1.0369 ppm,  $\delta$ 3.2695 ppm,  $\delta$ 3.3787 ppm, and  $\delta$ 3.6967 ppm show coupling, supporting propylene glycol being present. Peaks at  $\delta$ 1.1058 ppm,  $\delta$ 1.5600 ppm,  $\delta$ 3.8455 ppm, and peaks slightly downfield of  $\delta$ 3.5835 ppm support 1,3-butanediol being present. Coupling between peaks around  $\delta$ 1.11 ppm and  $\delta$ 3.51 ppm are likely from small amounts of ethanol being present in the sample but have overlapping peaks with other components. Glycerol peaks exhibit coupling between its peaks at  $\delta$ 3.4232 ppm,  $\delta$ 3.4987 ppm, and  $\delta$ 3.5835 ppm. Evidence of a long-chain alkane is seen by coupling between peaks at  $\delta$ 0.81 ppm and  $\delta$ 1.26 ppm.



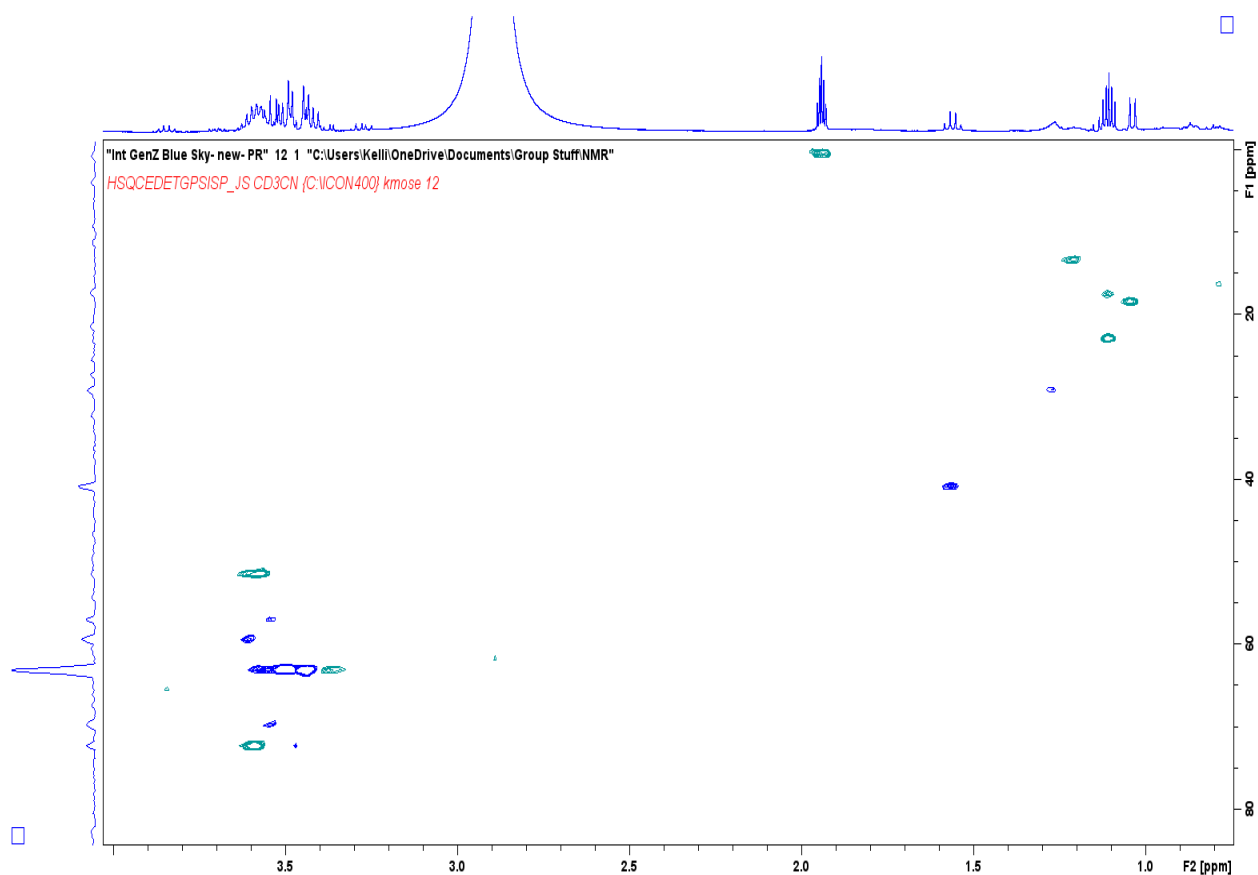

**Figure S12.**  $^1\text{H}$ - $^{13}\text{C}$  HSQC spectrum of Intenze GenZ Blue Sky ink pot residue in acetonitrile- $d_3$

Coupling occurs between the  $^1\text{H}$  and  $^{13}\text{C}$  peaks at  $\delta 1.0369$  ppm and  $\delta 19.0219$  ppm which is characteristic of propylene glycol. No other coupling is seen due to low concentration. Ethanol exhibits coupling between  $^1\text{H}$  peaks at  $\delta 1.11$  ppm and  $\delta 3.51$  ppm and  $^{13}\text{C}$  peaks at  $\delta 17.4$  ppm and  $\delta 57.1$  ppm, respectively. Coupling occurs between the  $^1\text{H}$  and  $^{13}\text{C}$  peaks at  $\delta 1.1058$  ppm and  $\delta 23.4915$  ppm,  $\delta 1.5600$  ppm and  $\delta 41.4568$  ppm,  $\delta 3.61$  ppm and  $\delta 60.0737$  ppm, and  $\delta 3.8455$  ppm and  $\delta 67.9397$  ppm support 1,3-butanediol being present in the sample. Some coupling also occurs between  $^1\text{H}$  peaks at  $\delta 3.4232$  ppm,  $\delta 3.4987$  ppm and  $\delta 3.5835$  ppm with  $^{13}\text{C}$  peaks at  $\delta 72.27$  ppm and  $\delta 60.97$  ppm which may be indicative of glycerol.

## 2.2 Dynamic Viking

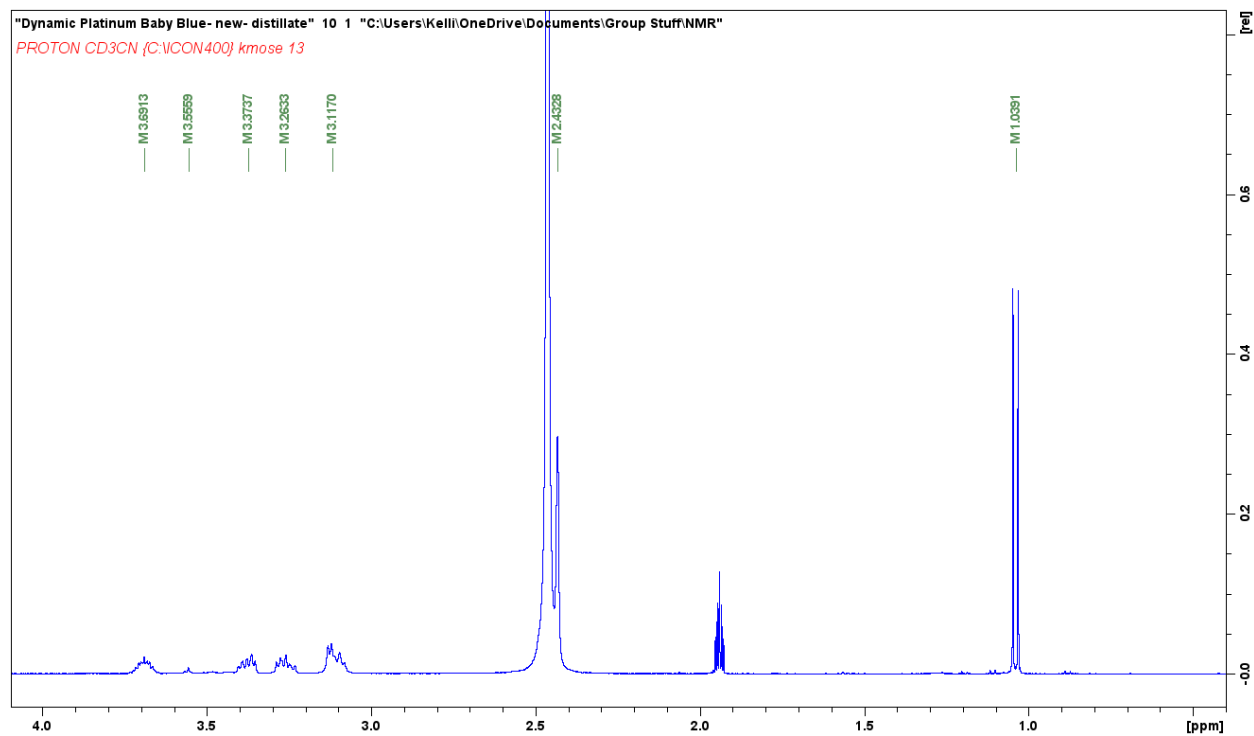

**Figure S13.** <sup>1</sup>H NMR spectrum of Dynamic Platinum Baby Blue ink distillate in acetonitrile-*d*<sub>3</sub>. Peaks at δ1.0391 ppm, δ3.1170 ppm, δ3.2633 ppm, δ3.3737 ppm, and δ3.6913 ppm are all produced by propylene glycol. The peak around δ2.45 ppm is produced by water. The peak at δ3.5559 ppm is unidentified.

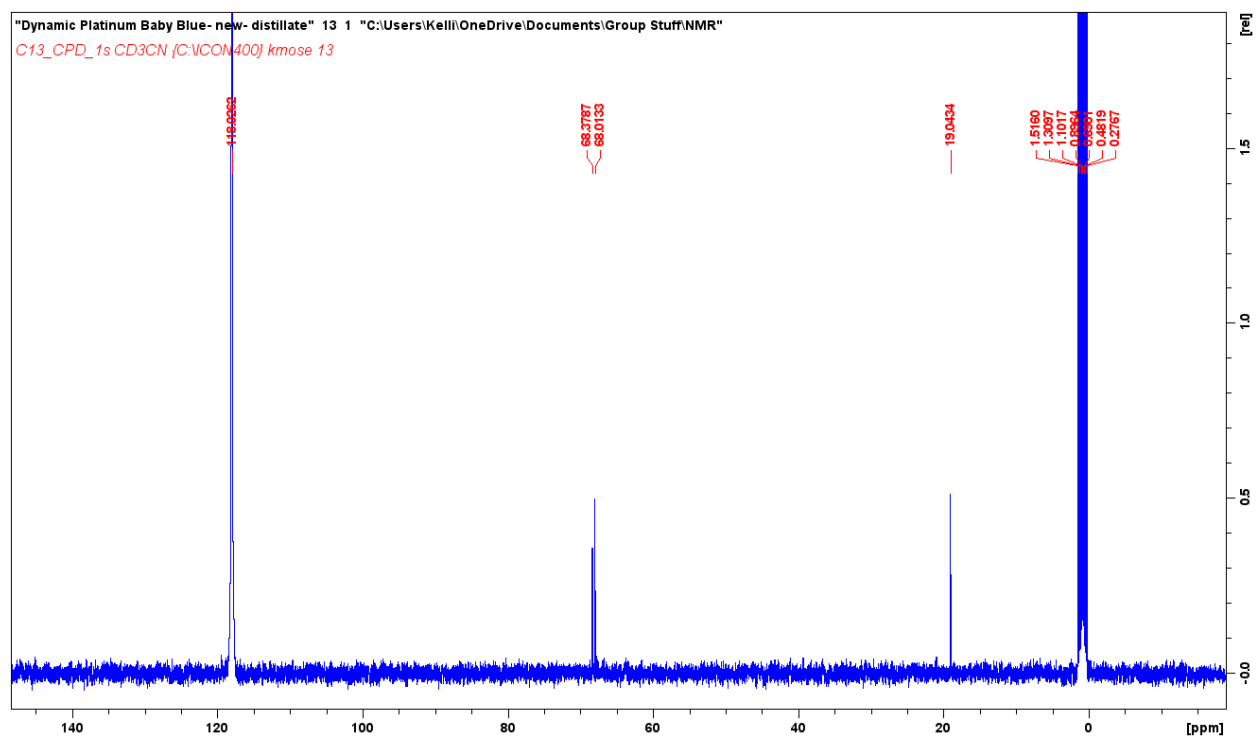

**Figure S14.**  $^{13}\text{C}$  NMR spectrum of Dynamic Platinum Baby Blue ink distillate in acetonitrile- $d_3$ . Peaks produced by propylene glycol are seen at  $\delta$ 19.0434 ppm,  $\delta$ 68.3787 ppm, and  $\delta$ 68.0133 ppm. The other peaks are produced but the acetonitrile solvent.

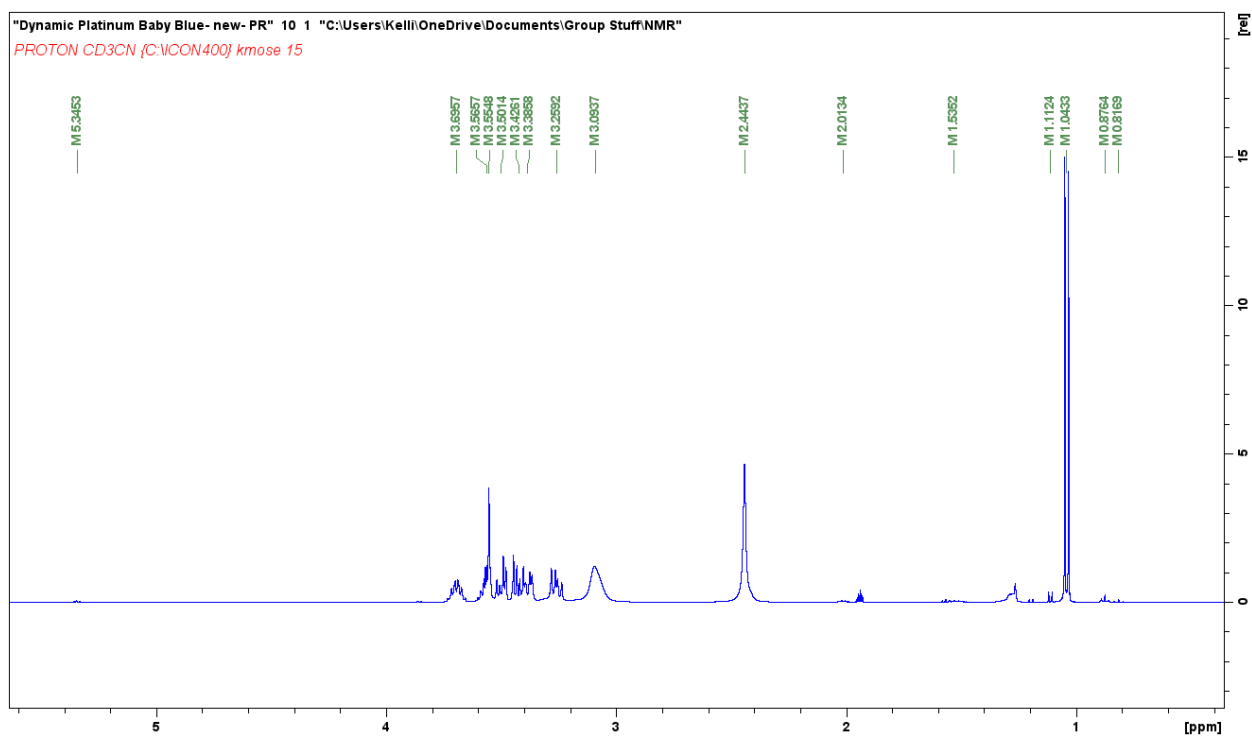

**Figure S15.**  $^1\text{H}$  NMR spectrum of Dynamic Platinum Baby Blue ink pot residue in acetonitrile- $d_3$

Peaks at  $\delta$ 1.0433 ppm,  $\delta$ 3.0937 ppm,  $\delta$ 3.2592 ppm,  $\delta$ 3.3858 ppm, and  $\delta$ 3.6957 ppm are produced by propylene glycol. Glycerol produces the peaks at  $\delta$ 3.4261 ppm,  $\delta$ 3.5014 ppm, and  $\delta$ 3.5657 ppm. A large singlet at  $\delta$ 3.5548 ppm is likely produced by polyethylene glycol. The singlet at  $\delta$ 2.2884 ppm is attributed to water. There are small peaks at  $\delta$ 0.8169 ppm,  $\delta$ 0.8764 ppm,  $\delta$ 1.2650 ppm,  $\delta$ 1.2824 ppm,  $\delta$ 1.51352 ppm,  $\delta$ 2.0134 ppm, and  $\delta$ 5.3470 ppm which are likely produced by a long-chain alkene. There are small signals at  $\delta$ 1.1124 ppm and  $\delta$ 3.8567 ppm which may be produced by small amounts of isopropyl alcohol. The peak at  $\delta$  2.4437 ppm is attributed to water.

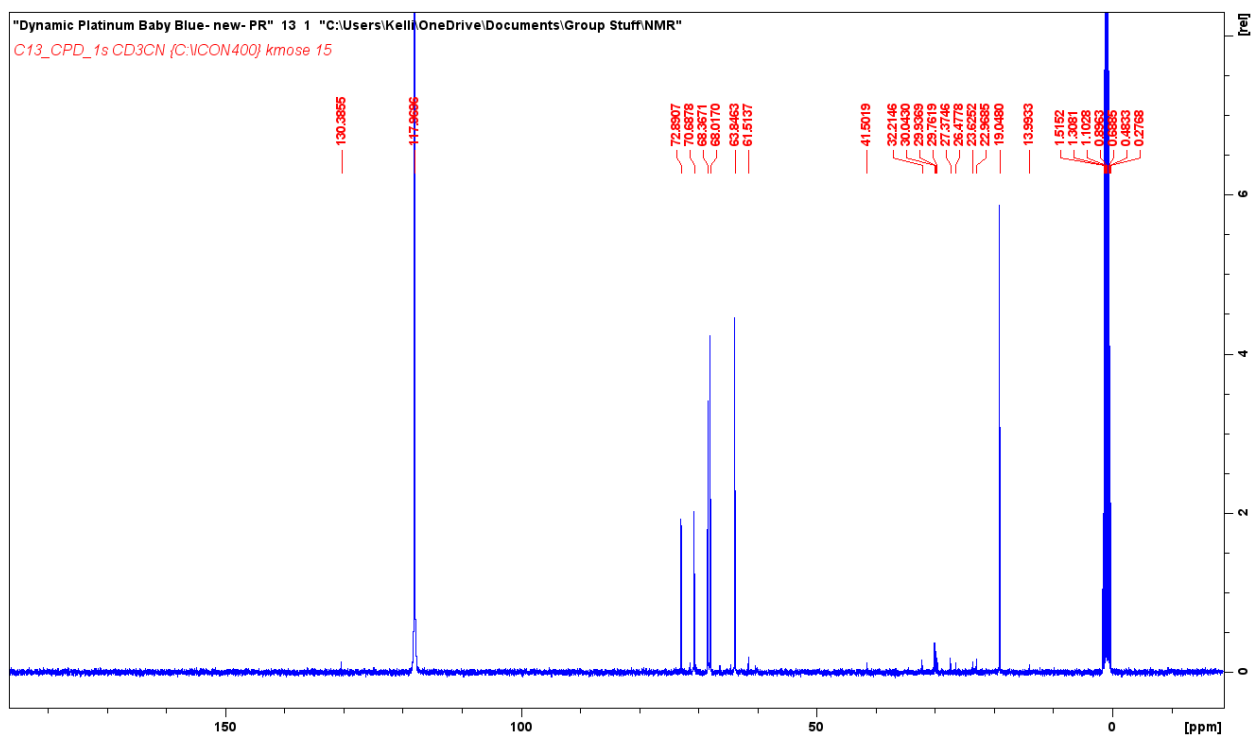

**Figure S16.**  $^{13}\text{C}$  NMR spectrum of Dynamic Platinum Baby Blue ink pot residue in acetonitrile- $d_3$

Peaks at  $\delta$ 19.0480 ppm,  $\delta$ 68.0170 ppm, and  $\delta$ 68.3671 ppm are attributed to propylene glycol. Glycerol produces the peaks at  $\delta$ 63.8463 ppm and  $\delta$ 72.8907 ppm. The peak at  $\delta$ 70.6878 ppm is characteristic of polyethylene glycol. Small peaks at  $\delta$ 13.9933 ppm,  $\delta$ 22.9685 ppm,  $\delta$ 26.4778 ppm,  $\delta$ 27.3746 ppm,  $\delta$ 29.7619 ppm,  $\delta$ 29.9385 ppm,  $\delta$ 30.0430 ppm,  $\delta$ 32.2146 ppm,  $\delta$ 61.5137 ppm, and  $\delta$ 130.3855 ppm are likely produced by a long-chain alkene. The peak at  $\delta$ 23.6252 ppm is likely from isopropyl alcohol.

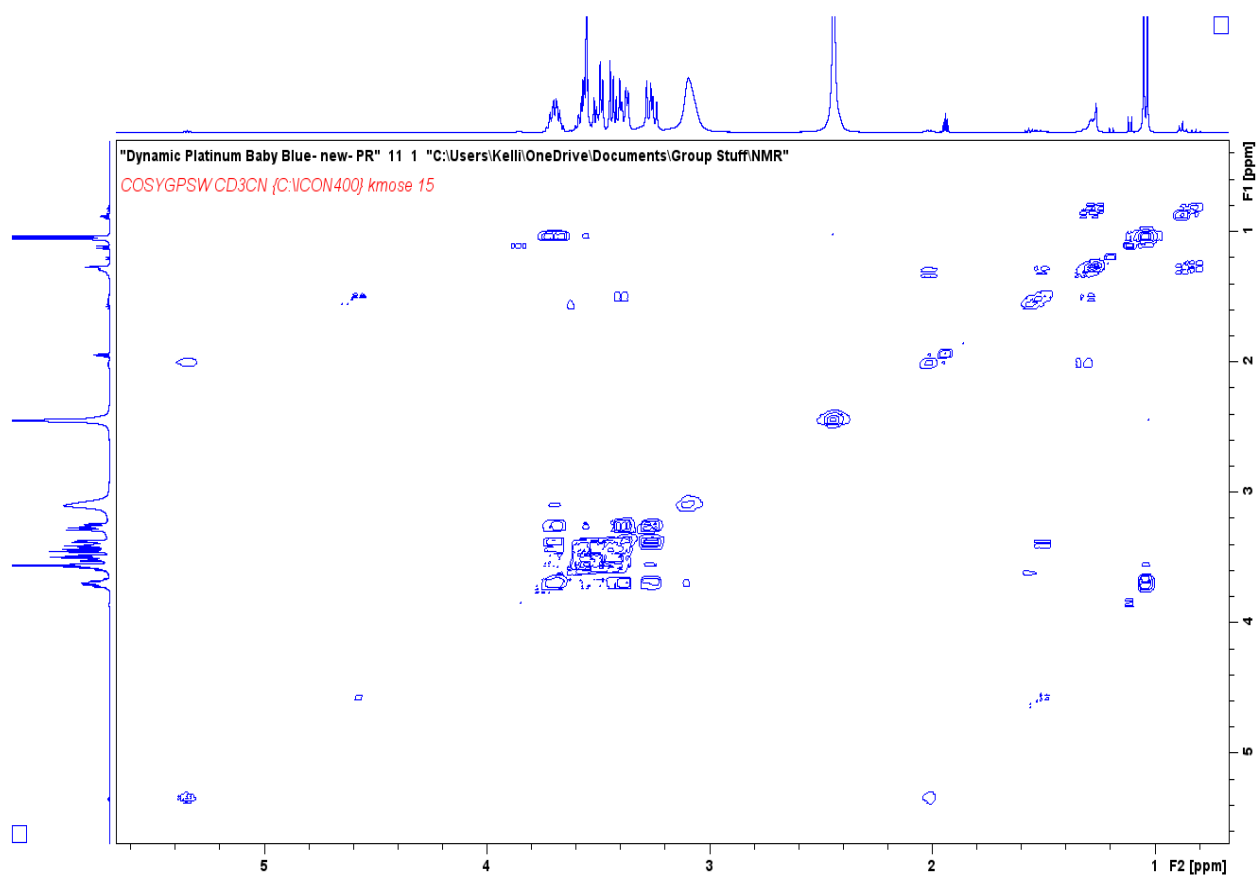

**Figure S17.**  $^1\text{H}$ - $^1\text{H}$  COSY spectrum of *Dynamic Platinum Baby Blue ink pot residue* in acetonitrile- $d_3$

Propylene glycol shows coupling between peaks at  $\delta$ 1.0433 ppm,  $\delta$ 3.0937 ppm,  $\delta$ 3.2592 ppm,  $\delta$ 3.3858 ppm, and  $\delta$ 3.6957 ppm. Additionally, coupling between peaks at  $\delta$ 3.4261 ppm,  $\delta$ 3.5014 ppm, and  $\delta$ 3.5657 ppm support glycerol being present. The peaks at  $\delta$ 0.8169 ppm,  $\delta$ 0.8764 ppm,  $\delta$ 1.2650 ppm,  $\delta$ 1.2824 ppm,  $\delta$ 1.5352 ppm,  $\delta$ 2.0134 ppm, and  $\delta$ 5.3470 ppm show coupling; coupling indicates that these peaks are all produced by the same unidentified alkene. Additionally, coupling occurring between the small doublet at  $\delta$ 1.1124 ppm and a small peak at  $\delta$ 3.8567 ppm supports isopropyl alcohol being in the sample.

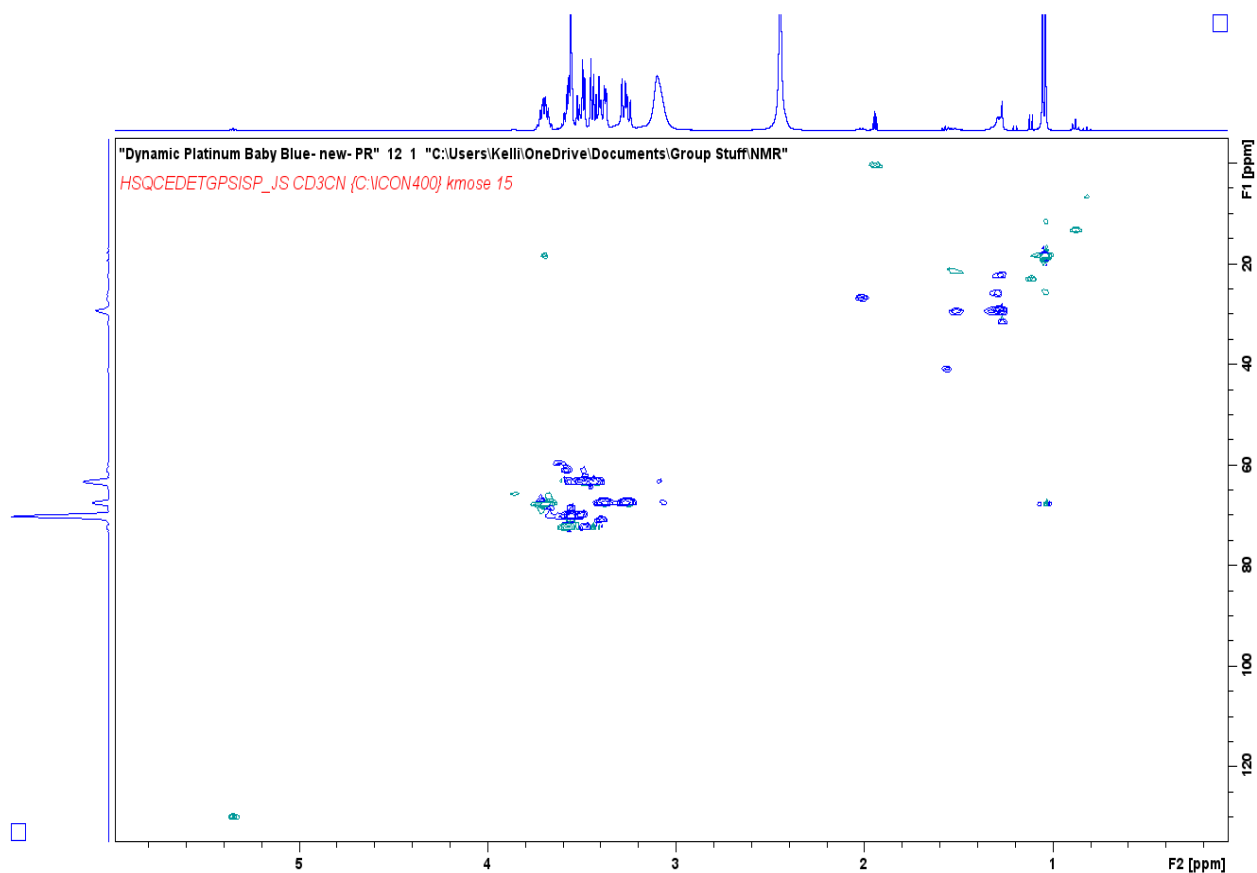

**Figure S18.**  $^1\text{H}$ - $^{13}\text{C}$  HSQC spectrum of Dynamic Platinum Baby Blue ink pot residue in acetonitrile- $d_3$

Characteristic propylene glycol  $^1\text{H}$ - $^{13}\text{C}$  coupling occurs between peaks at  $\delta 1.0433$  ppm and  $\delta 19.0480$  ppm, between peaks at  $\delta 3.2592$  ppm and  $\delta 3.3858$  ppm and  $\delta 68.0170$  ppm, and  $\delta 3.6957$  ppm and  $\delta 68.3671$  ppm. Additionally, coupling occurs between  $^1\text{H}$  glycerol peaks at  $\delta 3.4261$  ppm,  $\delta 3.5014$  ppm, and  $\delta 3.565$  ppm with  $^{13}\text{C}$  peaks at  $\delta 63.8463$  ppm and  $\delta 72.8907$  ppm. The  $^1\text{H}$  peak of polyethylene glycol at  $\delta 3.5548$  ppm couples with its  $^{13}\text{C}$  peak at  $\delta 70.6878$  ppm. Coupling occurs between the unidentified  $^1\text{H}$  peaks at  $\delta 0.8169$  ppm,  $\delta 0.8764$  ppm,  $\delta 1.2650$  ppm,  $\delta 1.2824$  ppm,  $\delta 1.5352$  ppm,  $\delta 2.0134$  ppm, and  $\delta 5.3470$  ppm with some of the unidentified  $^{13}\text{C}$  peaks at  $\delta 22.9685$  ppm,  $\delta 26.4778$  ppm,  $\delta 27.3746$  ppm,  $\delta 29.7619$  ppm,  $\delta 29.9369$  ppm,  $\delta 30.0430$  ppm,  $\delta 32.2116$  ppm,  $\delta 61.5137$  ppm, and  $\delta 130.3971$  ppm. These features are characteristic of a long-chain alkene. Lastly, coupling between  $^1\text{H}$  peaks at  $\delta 1.1124$  ppm and  $\delta 3.8567$  ppm and  $^{13}\text{C}$  peaks at  $\delta 23.6245$  ppm and  $\delta 65.69$  ppm, respectively, supports small amounts of isopropyl alcohol being present in the ink.

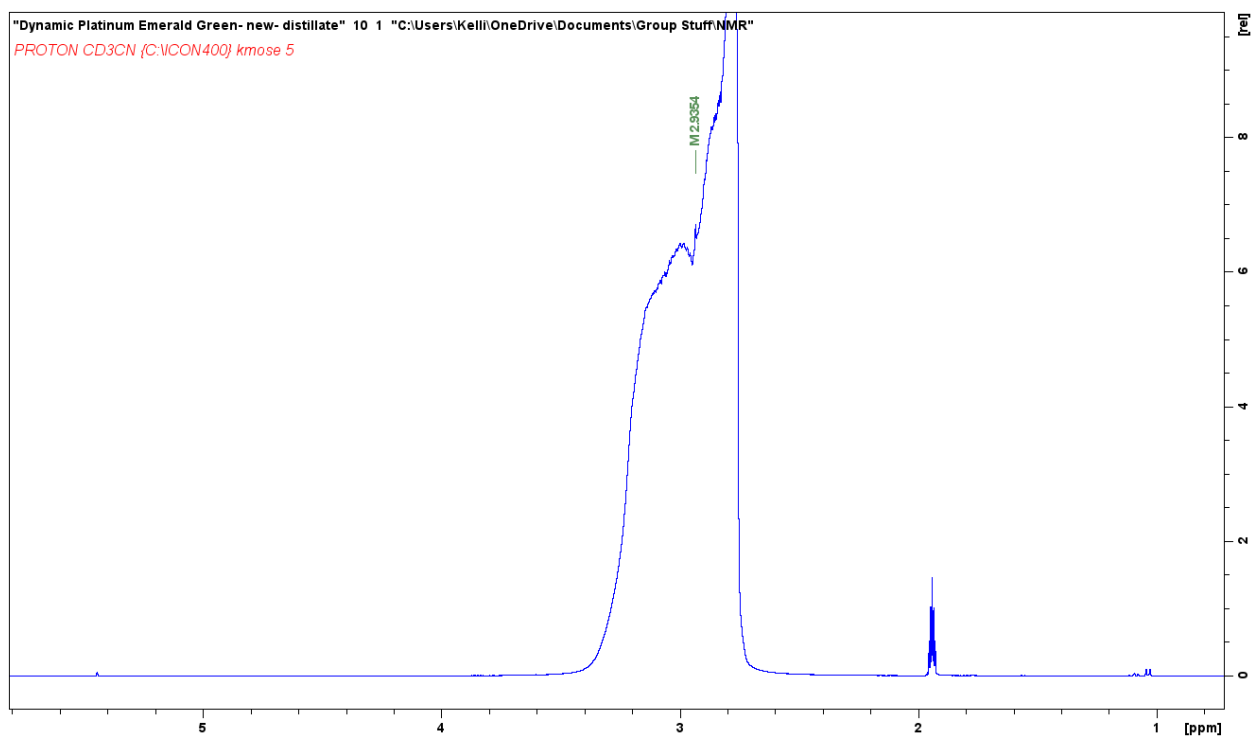

**Figure S19.**  $^1\text{H}$  NMR spectrum of Dynamic Platinum Emerald Green ink distillate in acetonitrile- $d_3$

A broad signal at  $\delta 2.9354$  ppm indicates a large amount of water in the sample. A peak at  $\delta 1.94$  ppm is from the solvent.



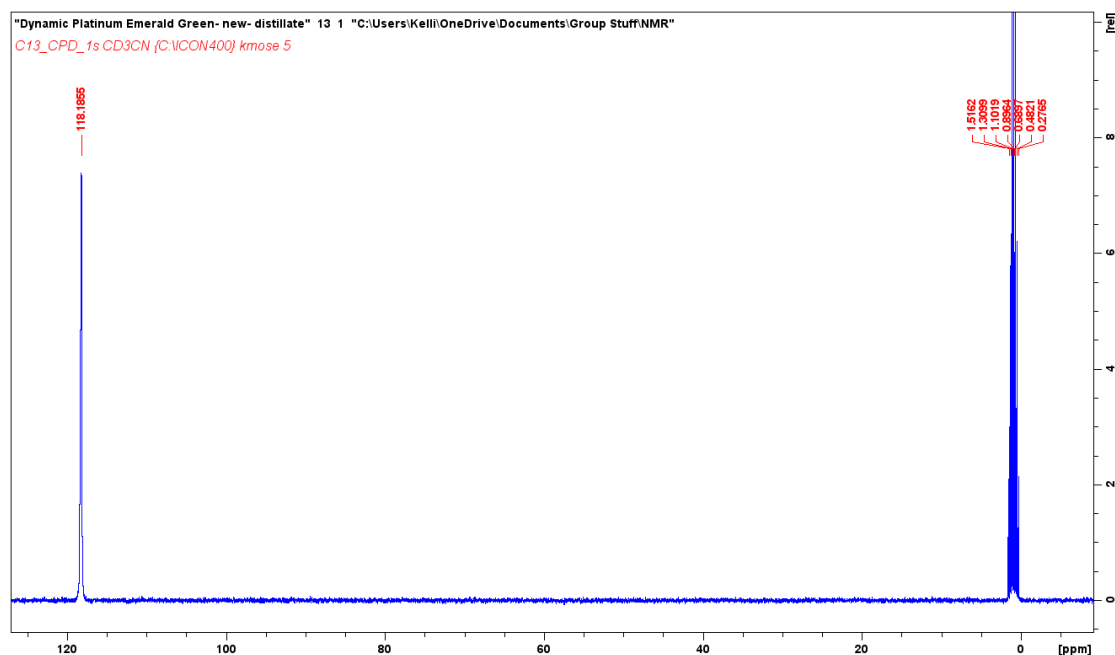

**Figure S20.**  $^{13}\text{C}$  NMR spectrum of Dynamic Platinum Emerald Green ink distillate in acetonitrile- $d_3$

The lack of signal, besides from the solvent, supports water being the only component of the ink's distillate.

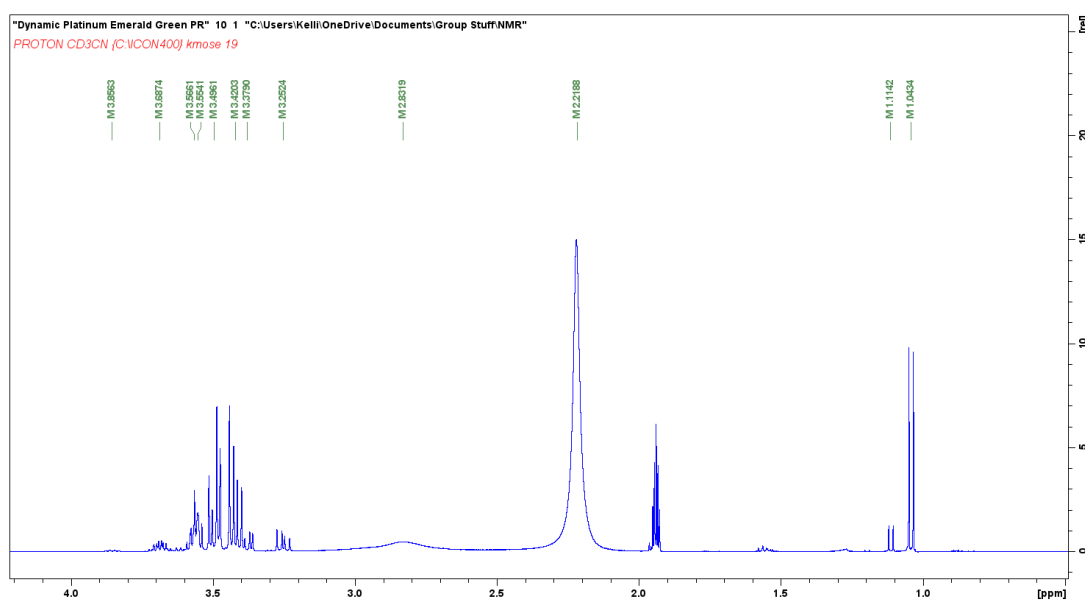

**Figure S21.**  $^1\text{H}$  NMR spectrum of Dynamic Platinum Emerald Green ink pot residue in acetonitrile- $d_3$

Propylene glycol produces signals at  $\delta$ 1.0434 ppm,  $\delta$ 3.2524 ppm,  $\delta$ 3.3790 ppm, and  $\delta$ 3.6874 ppm. Signals at  $\delta$ 3.4203 ppm,  $\delta$ 3.4961 ppm and  $\delta$ 3.5661 ppm are attributed to glycerol. Polyethylene glycol likely produces the singlet at  $\delta$ 3.5541 ppm. Peaks at  $\delta$ 1.142 ppm and  $\delta$ 3.8563 ppm are made by isopropyl alcohol. The peak at  $\delta$ 2.2188 ppm is attributed to water.

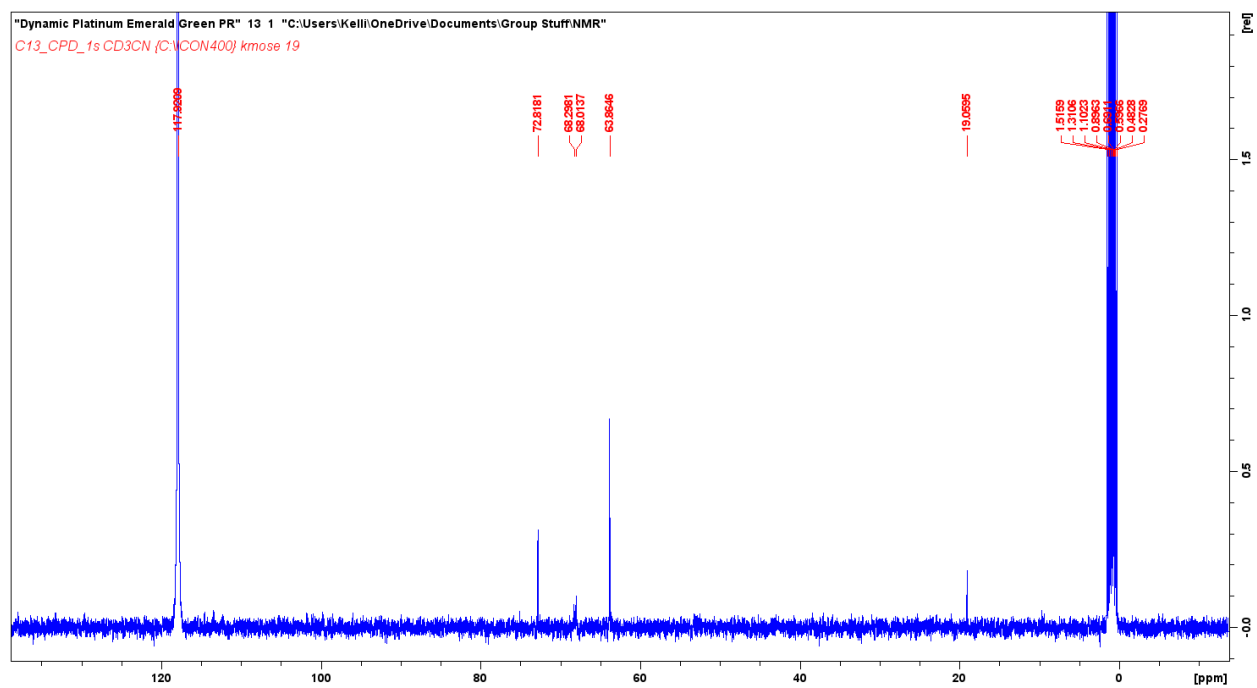

**Figure S22.**  $^{13}\text{C}$  NMR spectrum of Dynamic Platinum Emerald Green ink pot residue in acetonitrile- $d_3$

Glycerol produces signals at  $\delta 63.6846$  ppm and  $\delta 72.8181$  ppm. Signals at  $\delta 19.0595$  ppm,  $\delta 68.0137$  ppm, and  $\delta 68.2981$  ppm are produced by propylene glycol.

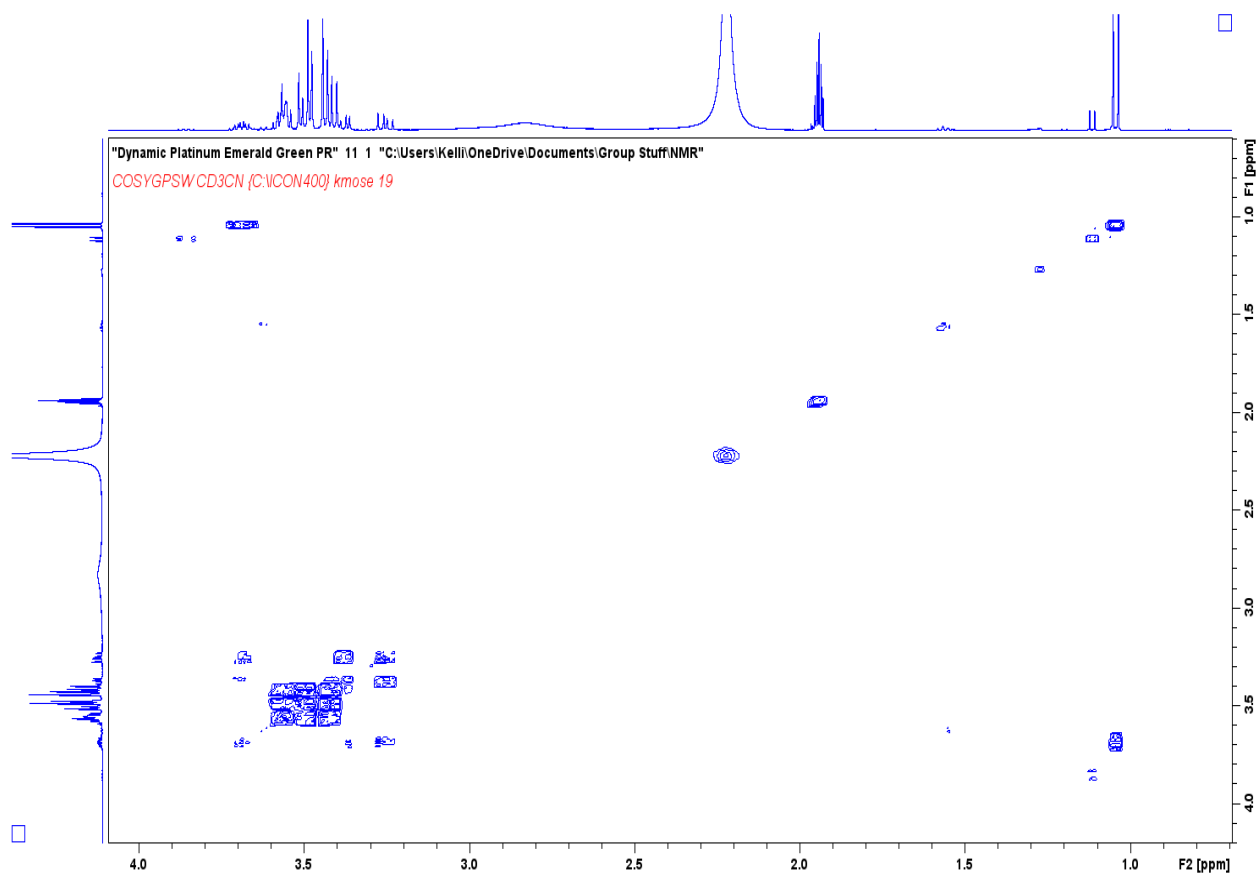

**Figure S23.**  $^1\text{H}$ - $^1\text{H}$  COSY spectrum of Dynamic Platinum Emerald Green ink pot residue in acetonitrile- $d_3$

Coupling between peaks at  $\delta$ 1.0434 ppm,  $\delta$ 3.2524 ppm,  $\delta$ 3.3790 ppm, and  $\delta$ 3.6874 ppm support propylene glycol being present. Additionally, coupling occurs between peaks at  $\delta$ 3.4203 ppm,  $\delta$ 3.4961 ppm and  $\delta$ 3.5661 ppm. This supports glycerol being present. There is also coupling between the peaks at  $\delta$ 1.1142 ppm and  $\delta$ 3.8563 ppm, which supports isopropyl alcohol being in this ink.

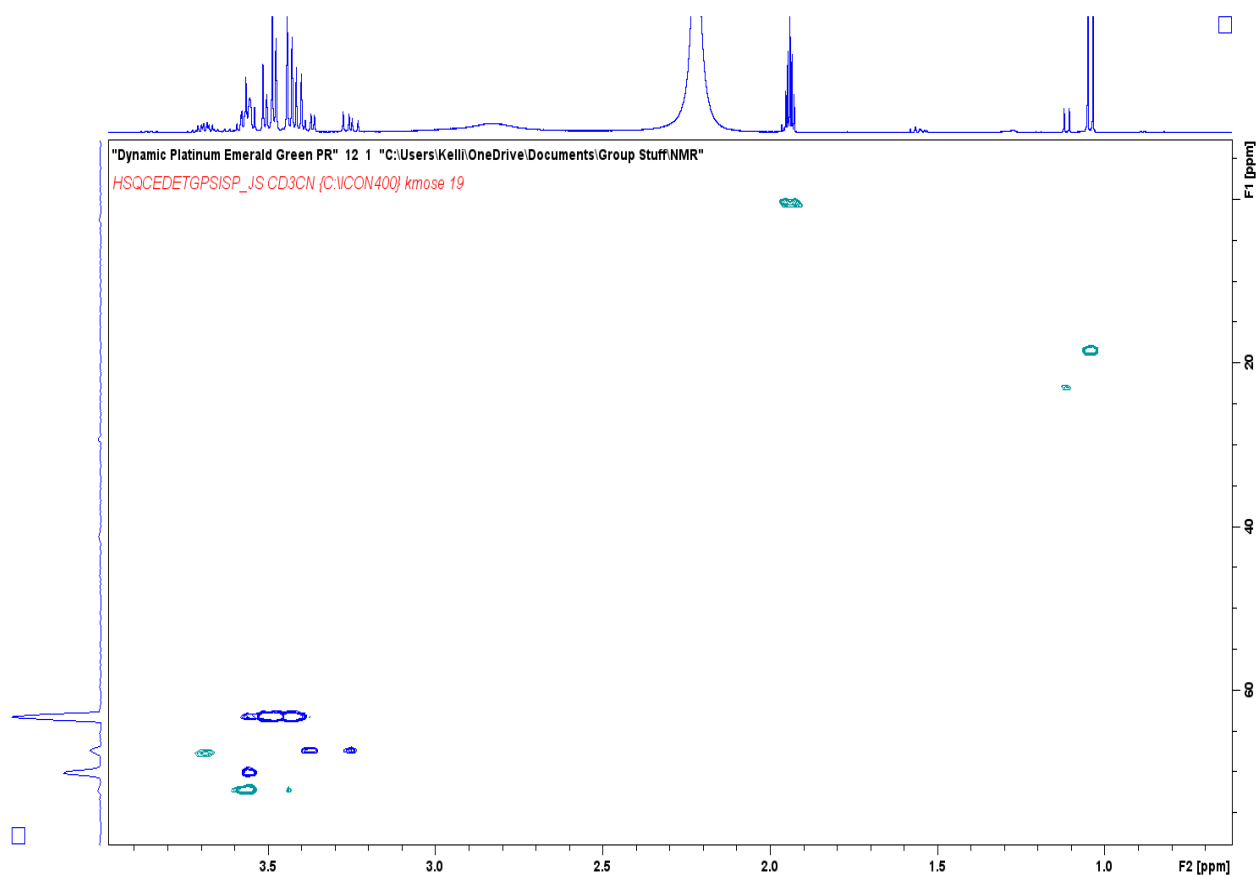

**Figure S24.**  $^1\text{H}$ - $^{13}\text{C}$  HSQC spectrum of Dynamic Platinum Emerald Green ink pot residue in acetonitrile- $d_3$

Coupling occurs between  $^1\text{H}$  peaks at  $\delta 3.4203$  ppm and  $\delta 3.4961$  ppm with a  $^{13}\text{C}$  peak at  $\delta 63.8646$  ppm, as well as between the  $^1\text{H}$  peak at  $\delta 3.5661$  ppm and  $^{13}\text{C}$  peak at  $\delta 72.8181$  ppm supports glycerol being present in the sample. Coupling occurs between peaks at  $\delta 1.0434$  ppm and  $\delta 19.0595$  ppm,  $\delta 3.2524$  ppm,  $\delta 3.3790$  ppm and  $\delta 68.0137$  ppm, and  $\delta 3.6874$  ppm and  $\delta 68.2981$  ppm. This supports propylene glycol being present. Isopropyl alcohol  $^1\text{H}$  peaks at  $\delta 1.1142$  ppm and  $\delta 3.8563$  ppm exhibit coupling with  $^{13}\text{C}$  peaks at  $\delta 23.1$  ppm and  $\delta 67.8$  ppm. The coupling between the  $^1\text{H}$  peak at  $\delta 3.5541$  ppm and  $^{13}\text{C}$  peak at  $\delta 70.1$  ppm support polyethylene glycol being present.

## 2.3 Quantum Ink

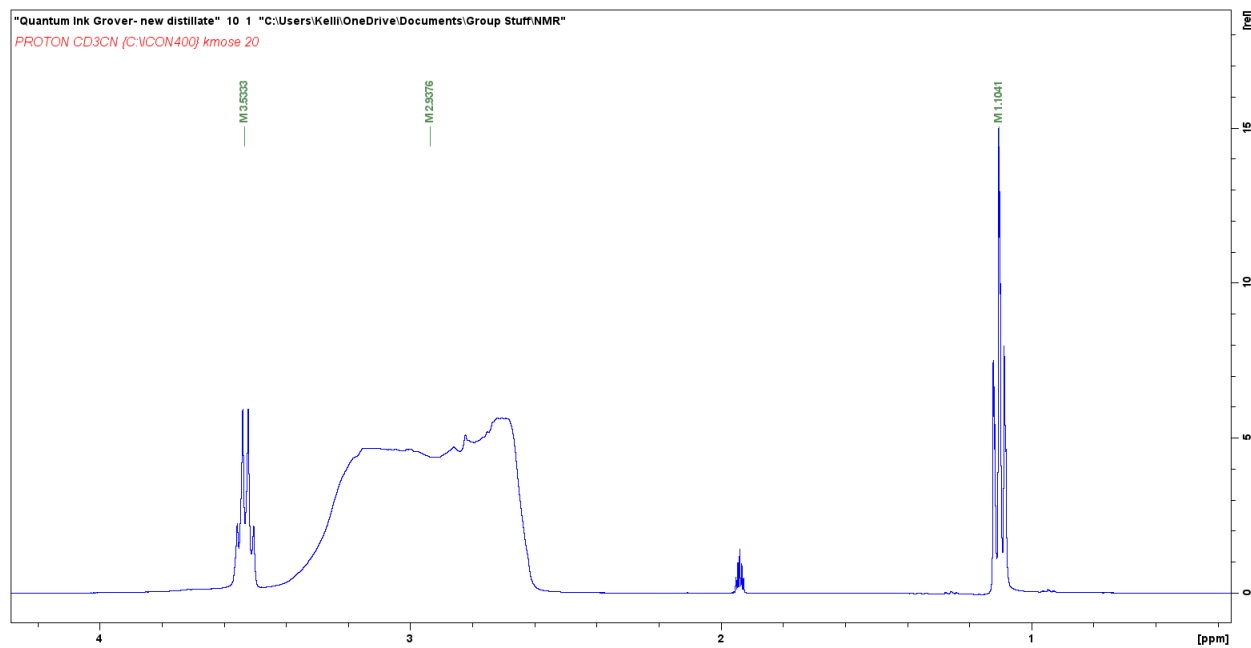

**Figure S25.**  $^1\text{H}$  NMR spectrum of Quantum Ink Grover distillate in acetonitrile- $d_3$

Peaks at  $\delta 1.1$  ppm and  $\delta 3.5333$  ppm are produced by ethanol. A broad peak centered at  $\delta 2.9376$  ppm is attributed to large amounts of water. The remaining peak is produced by the solvent.

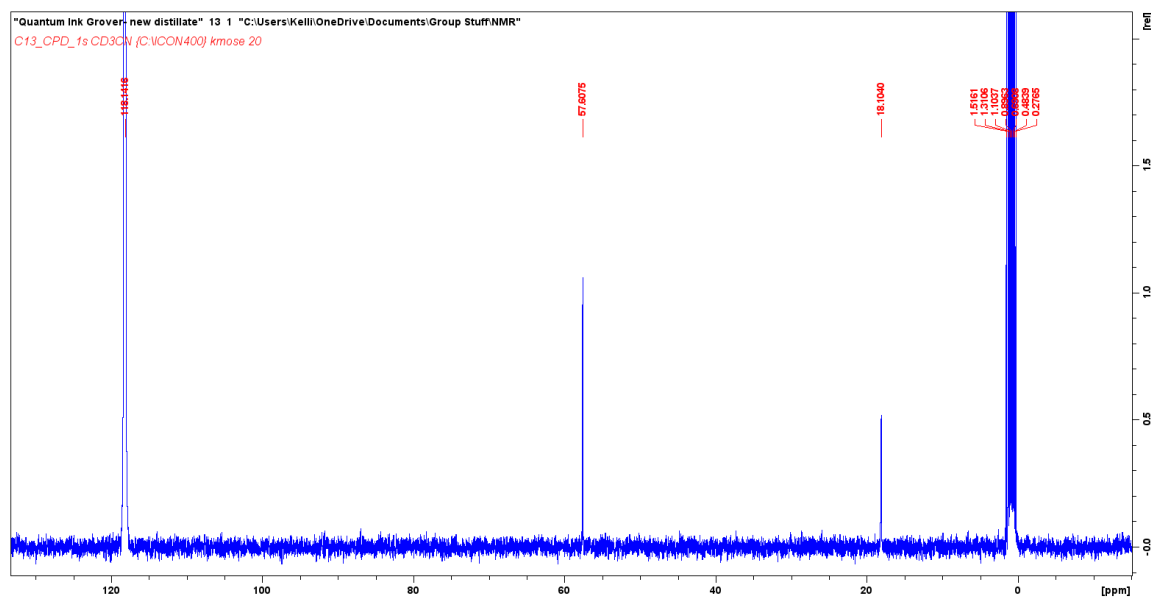

**Figure S26.**  $^{13}\text{C}$  NMR spectrum of Quantum Ink Grover distillate in acetonitrile- $d_3$

Peaks at  $\delta 18.1040$  ppm and  $\delta 57.6075$  ppm are attributed to ethanol. The remaining peaks are produced by the solvent.

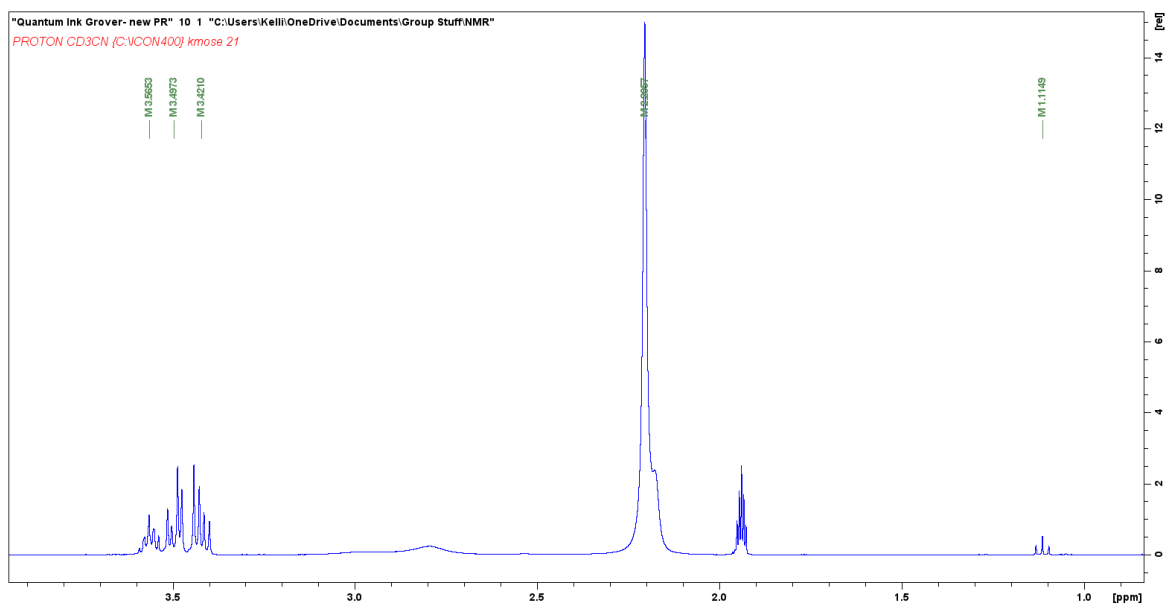

**Figure S27.**  $^1\text{H}$  NMR spectrum of Quantum Ink Grover pot residue in acetonitrile- $d_3$ . Glycerol produced the signals at  $\delta$ 3.4210 ppm,  $\delta$ 3.4973 ppm, and  $\delta$ 3.5653 ppm. Water produced the peak at  $\delta$ 2.2057 ppm. The peak at  $\delta$ 1.94 ppm is from the acetonitrile solvent. The small triplet at  $\delta$ 1.1149 ppm is likely from small amount of ethanol.

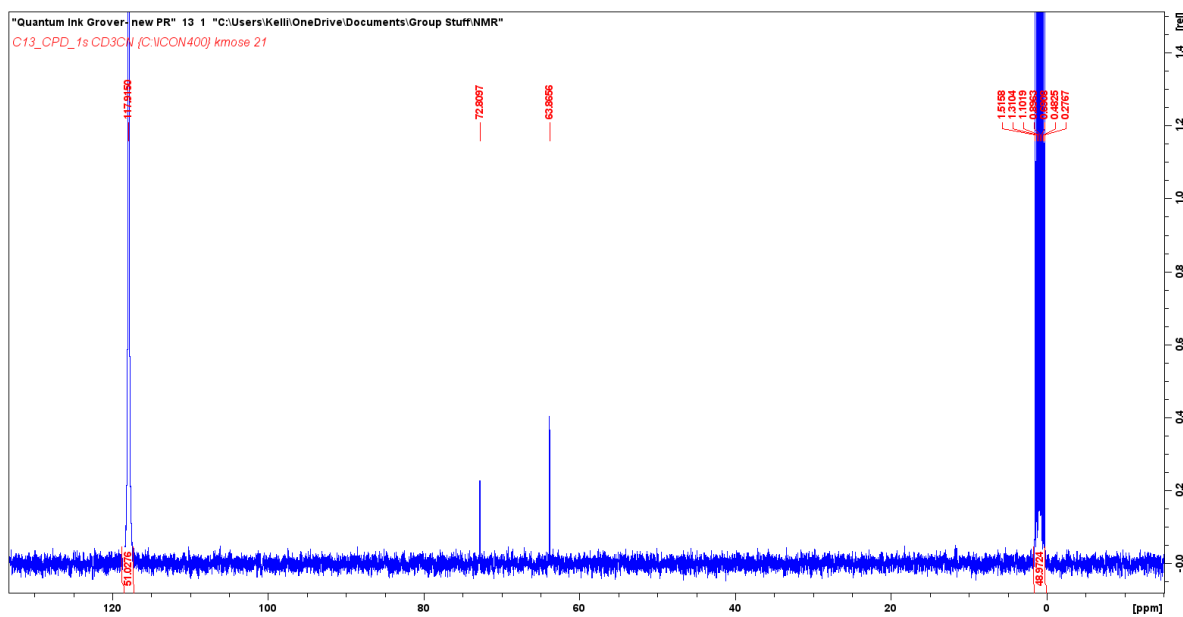

**Figure S28.**  $^{13}\text{C}$  NMR spectrum of Quantum Ink Grover pot residue in acetonitrile- $d_3$ . Peaks at  $\delta$ 63.8656 ppm and  $\delta$ 72.8097 ppm are attributed to glycerol. The remaining peaks are produced by the acetonitrile solvent.

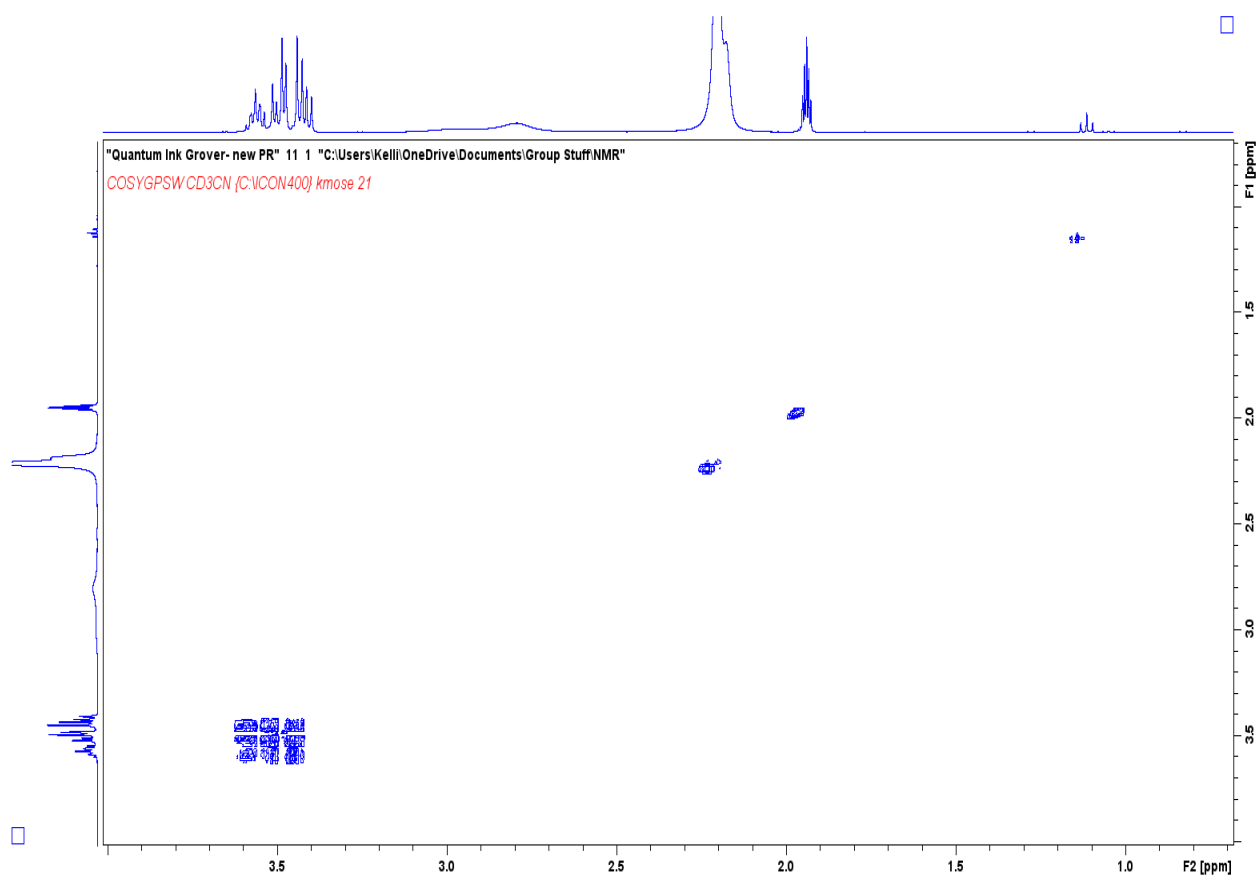

**Figure S29.**  $^1\text{H}$ - $^1\text{H}$  COSY spectrum of Quantum Ink Grover pot residue in acetonitrile- $d_3$ . Coupling between peaks at 53.4210 ppm, 53.4973 ppm, and 53.5653 ppm support glycerol being present in the sample.

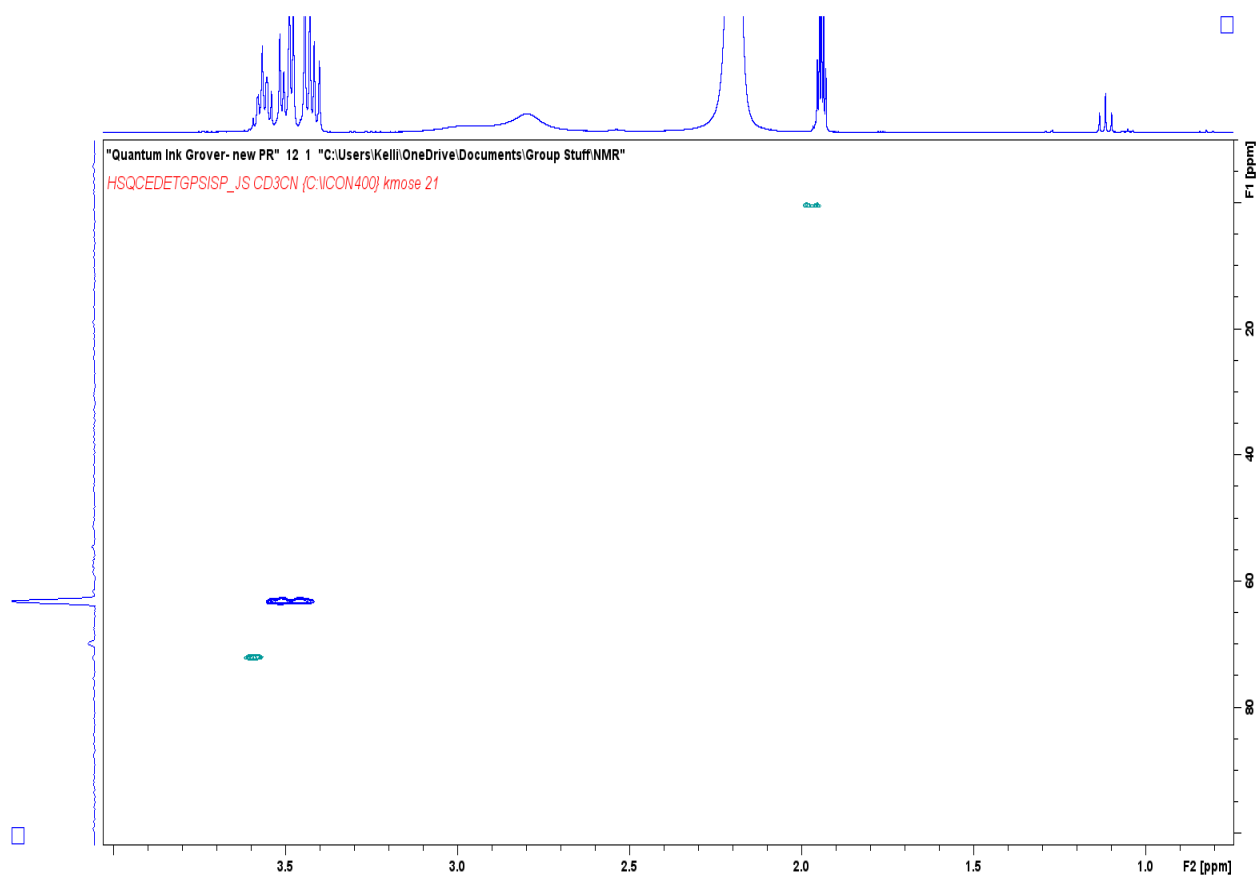

**Figure S30.**  $^1\text{H}$ - $^{13}\text{C}$  HSQC spectrum of Quantum Ink Grover pot residue in acetonitrile- $d_3$ . Coupling between the  $^1\text{H}$  peaks and  $^{13}\text{C}$  peaks at  $\delta 3.4210$  ppm,  $\delta 3.4973$  ppm, and  $\delta 3.8656$  ppm, as well as  $\delta 3.5653$  ppm and  $\delta 72.8097$  ppm support glycerol being present.



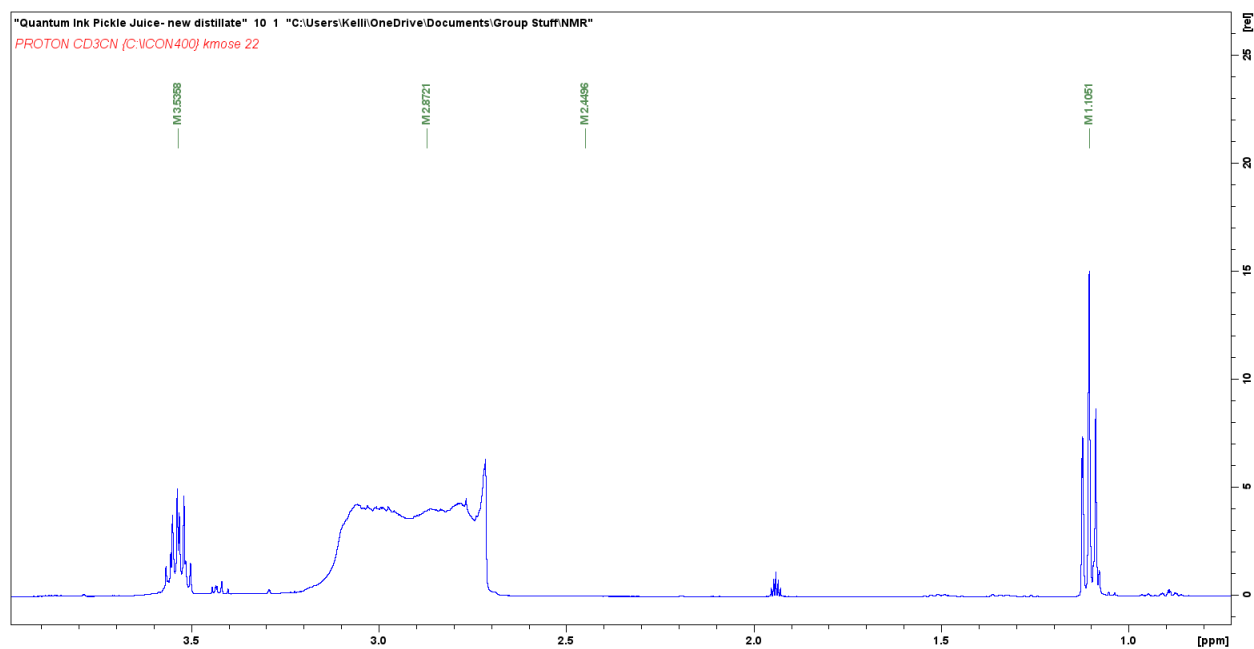

**Figure S31.**  $^1\text{H}$  NMR spectrum of Quantum Ink Pickle Juice distillate in acetonitrile- $d_3$ . Peaks at  $\delta 1.1051$  ppm and  $\delta 3.5358$  ppm are attributed to ethanol. A broad signal centered around  $\delta 2.8731$  ppm is produced by water. The peak at  $\delta 1.94$  ppm is from the solvent.

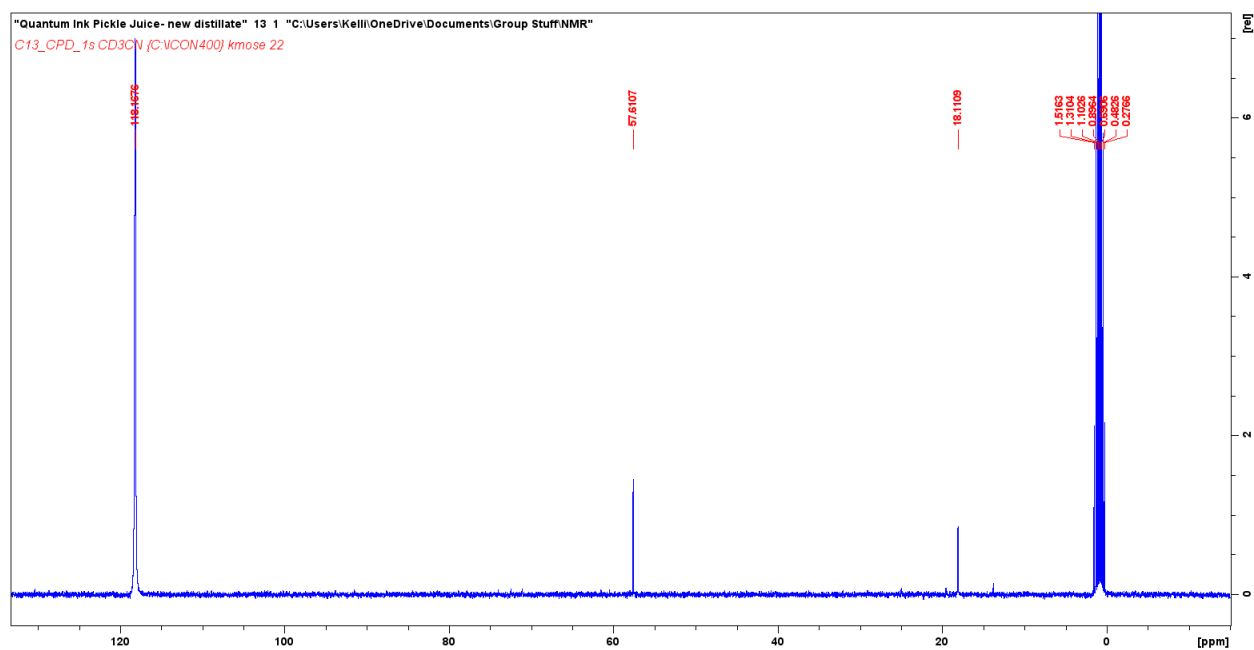

**Figure S32.**  $^{13}\text{C}$  NMR spectrum of Quantum Ink Pickle Juice distillate in acetonitrile- $d_3$ . Peaks at  $\delta 18.1109$  ppm and  $\delta 57.6107$  ppm are attributed to ethanol. The remaining peaks are produced by the solvent.

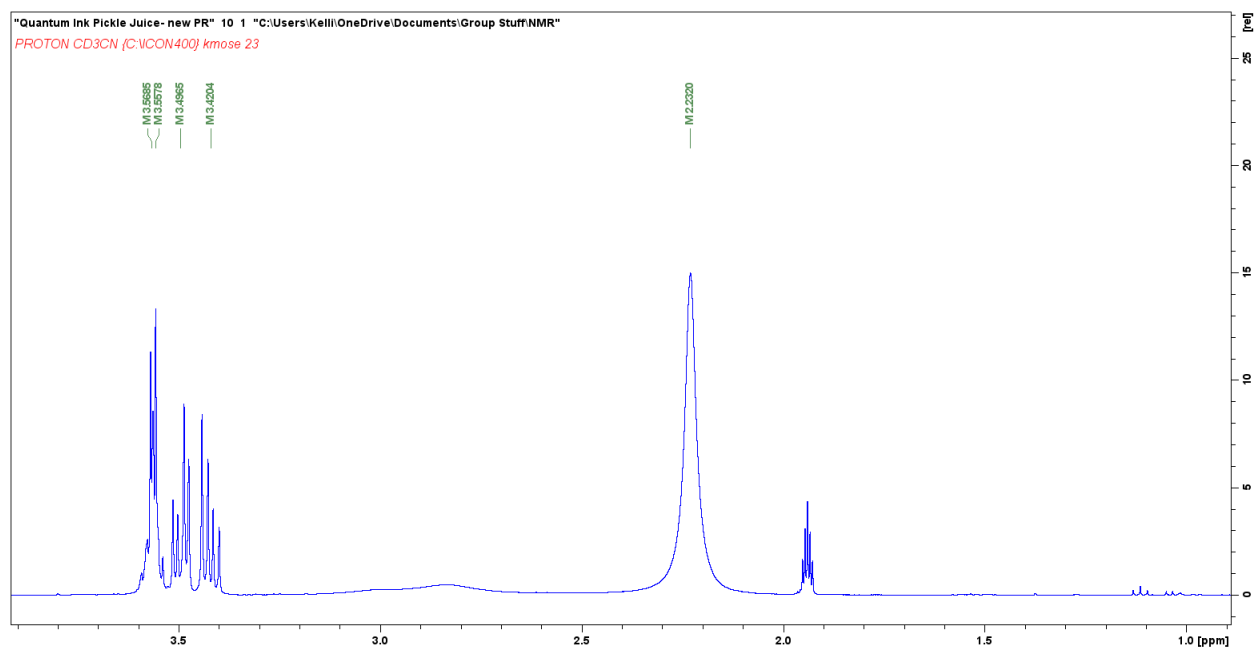

**Figure S33.**  $^1\text{H}$  NMR spectrum of Quantum Ink Pickle Juice pot residue in acetonitrile- $d_3$

Glycerol peaks can be seen at  $\delta$ 3.4204 ppm and  $\delta$ 3.4965 ppm, as well as a peak that is overlapping with a small ethanol peak at  $\delta$ 3.5685 ppm. A polyethylene glycol peak appears at  $\delta$ 3.5578 ppm. A small triplet produced by ethanol appears upfield at around  $\delta$ 1.11 ppm.

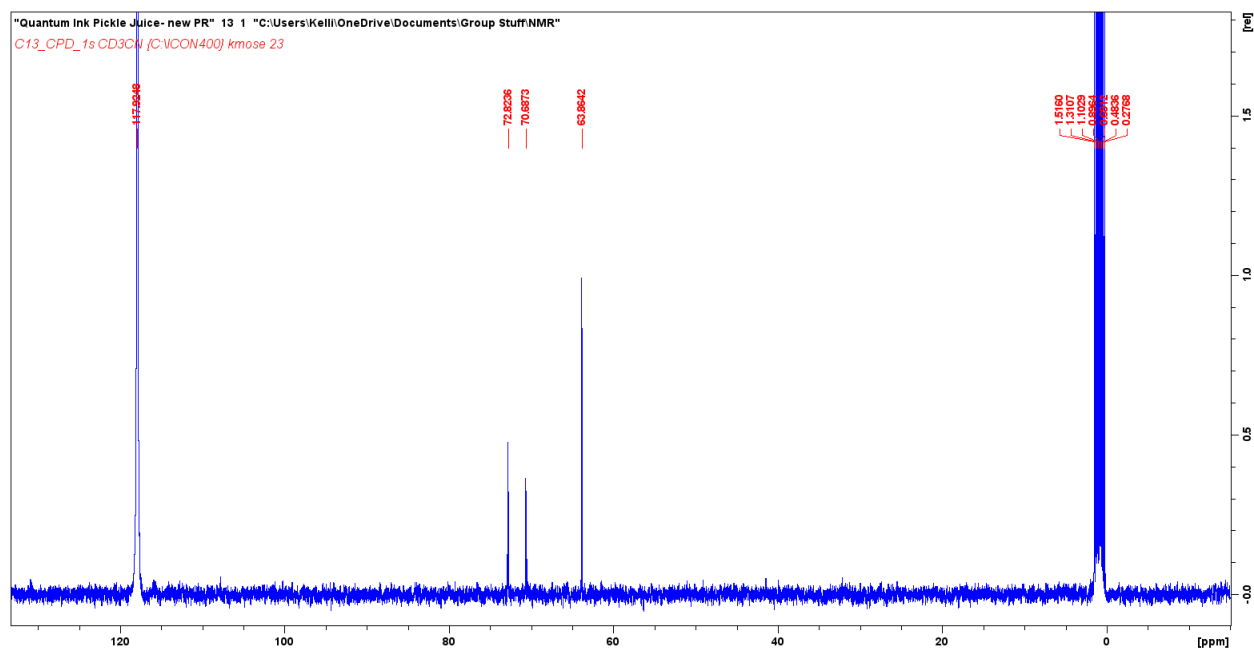

**Figure S34.**  $^{13}\text{C}$  NMR spectrum of Quantum Ink Pickle Juice pot residue in acetonitrile- $d_3$

Peaks at  $\delta$ 63.8642 ppm and  $\delta$ 72.8236 ppm support glycerol being in the sample. The peak at  $\delta$ 70.6873 ppm is likely produced by polyethylene glycol.

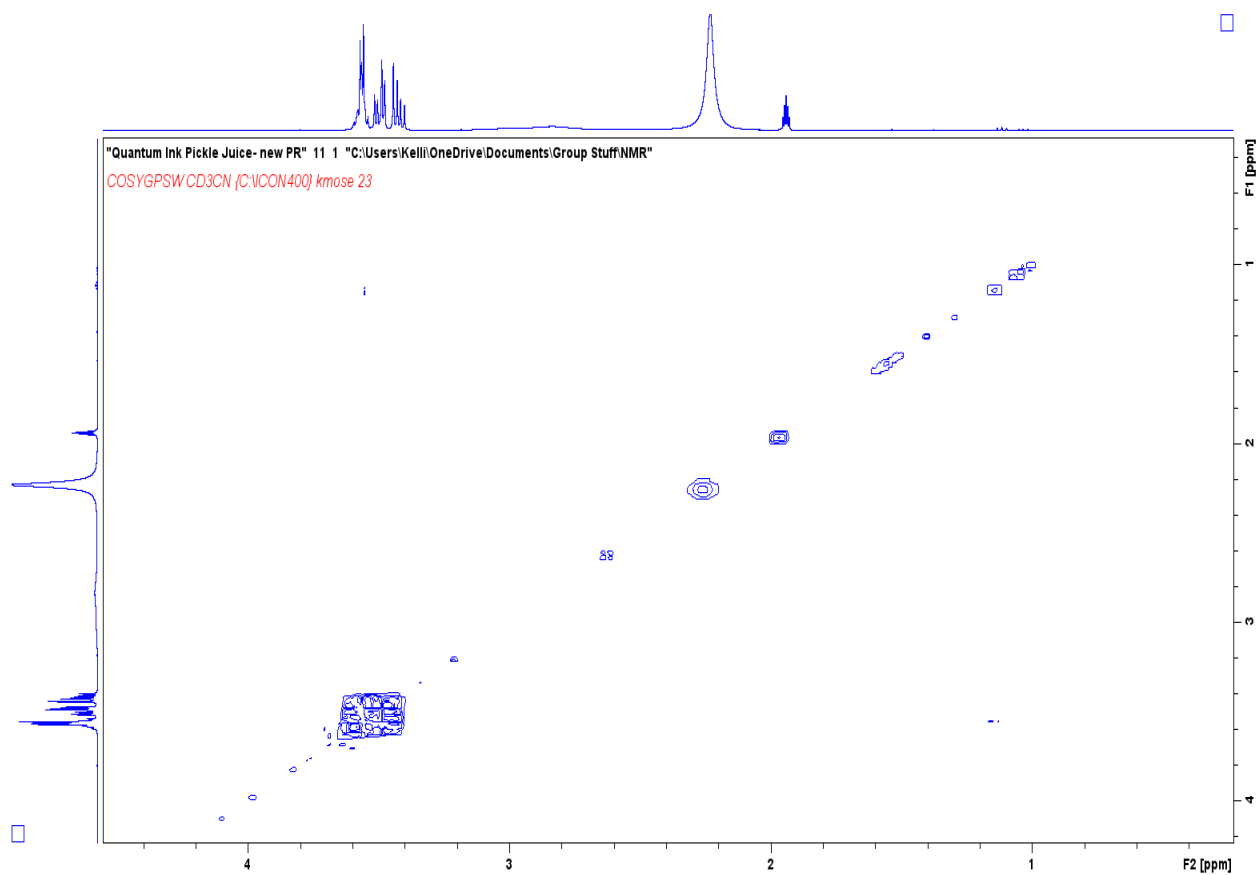

**Figure S35.**  $^1\text{H}$ - $^1\text{H}$  COSY spectrum of Quantum Pickle Juice pot residue in acetonitrile- $d_3$

Coupling occurring between peaks at  $\delta$ 3.4217 ppm and  $\delta$ 3.4960 ppm, as well to the peaks that overlap the ethanol peak at  $\delta$ 3.5618 ppm support glycerol being present in the sample.

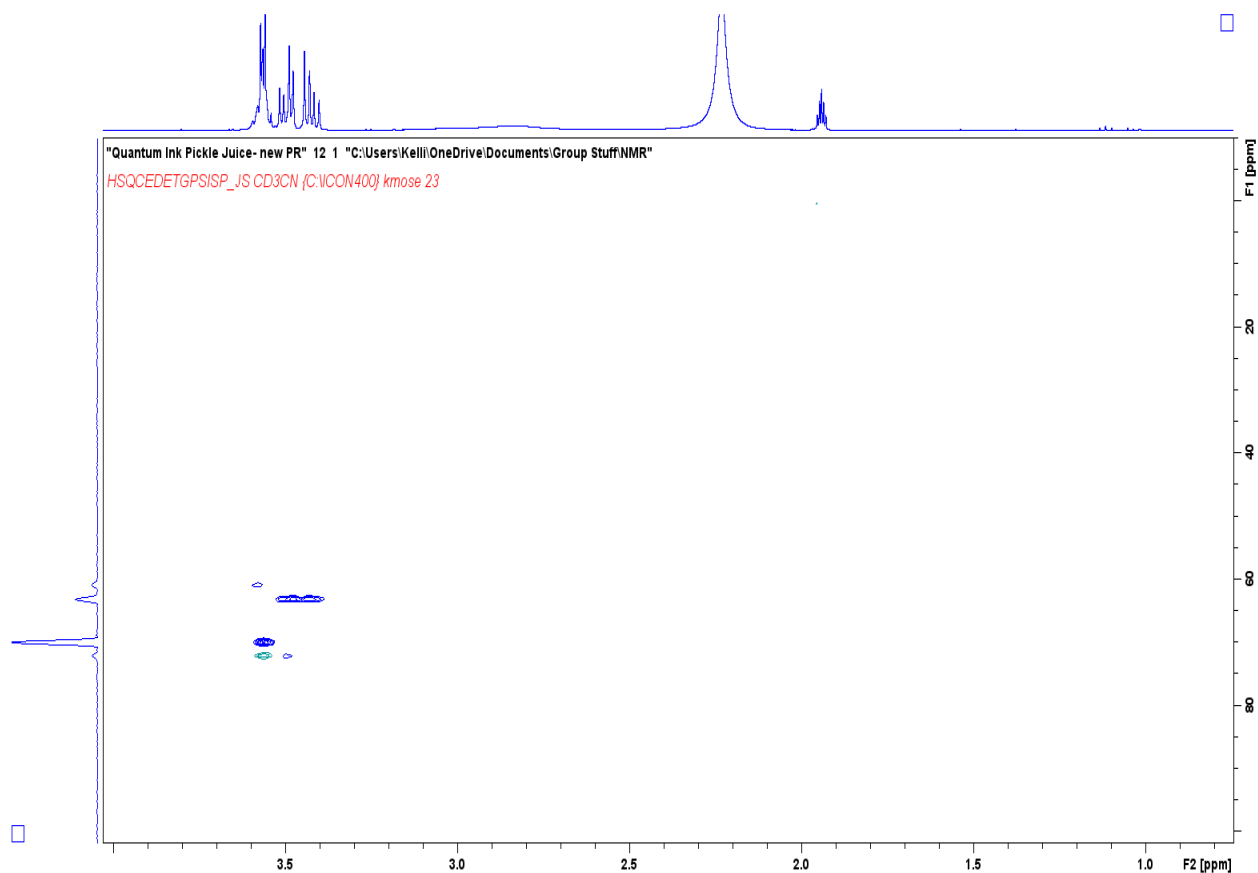

**Figure S36.**  $^1\text{H}$ - $^{13}\text{C}$  HSQC spectrum of Quantum Pickle Juice pot residue in acetonitrile- $d_3$ .  $^1\text{H}$  peaks at  $\delta 3.4204$  ppm,  $\delta 3.4965$  ppm, and  $\delta 3.5685$  ppm couple with  $^{13}\text{C}$  peaks at  $\delta 63.8642$  ppm and  $\delta 72.8236$  ppm, supporting glycerol being present. There appears to be coupling between a  $^1\text{H}$  peak at  $\delta 3.5578$  ppm and a  $^{13}\text{C}$  peak at  $\delta 70.6873$  ppm, which is characteristic of polyethylene glycol.

## 2.4 Xtreme Ink

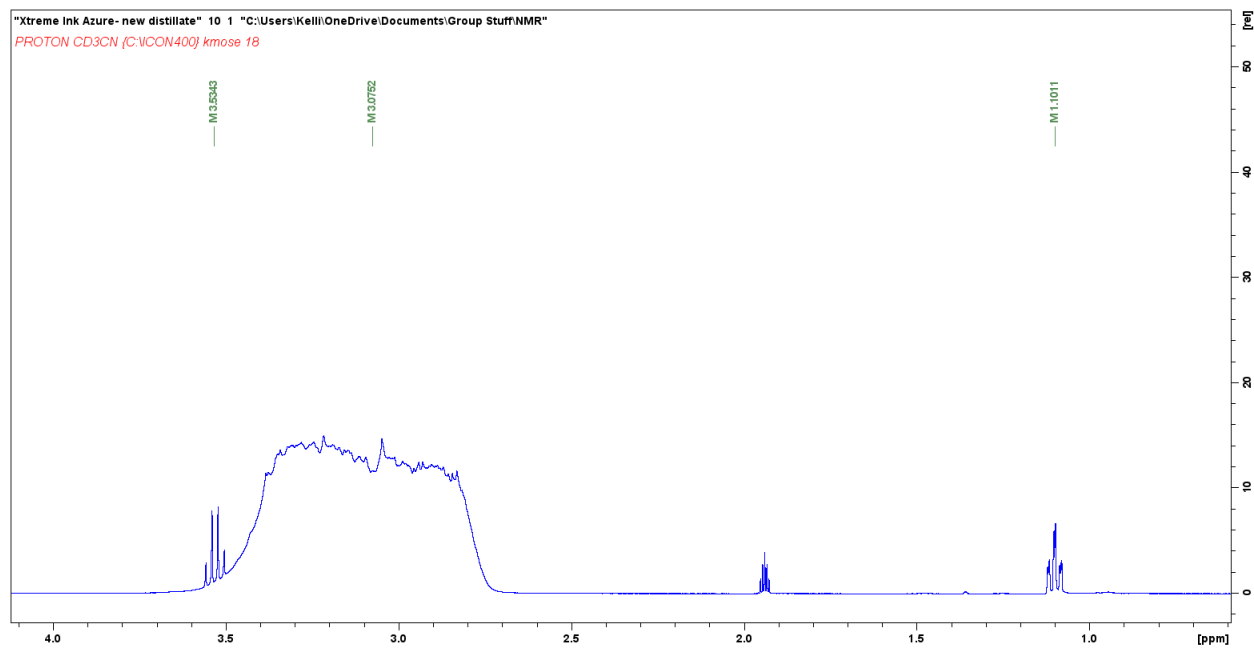

**Figure S37.**  $^1\text{H}$  NMR spectrum of Xtreme Ink Azure distillate in acetonitrile- $d_3$

Peaks at  $\delta$ 1.1011 ppm and  $\delta$ 3.5343 ppm are produced by ethanol. A broad peak centered at  $\delta$ 3.0752 ppm is attributed to water. The remaining peak is produced by the acetonitrile solvent.

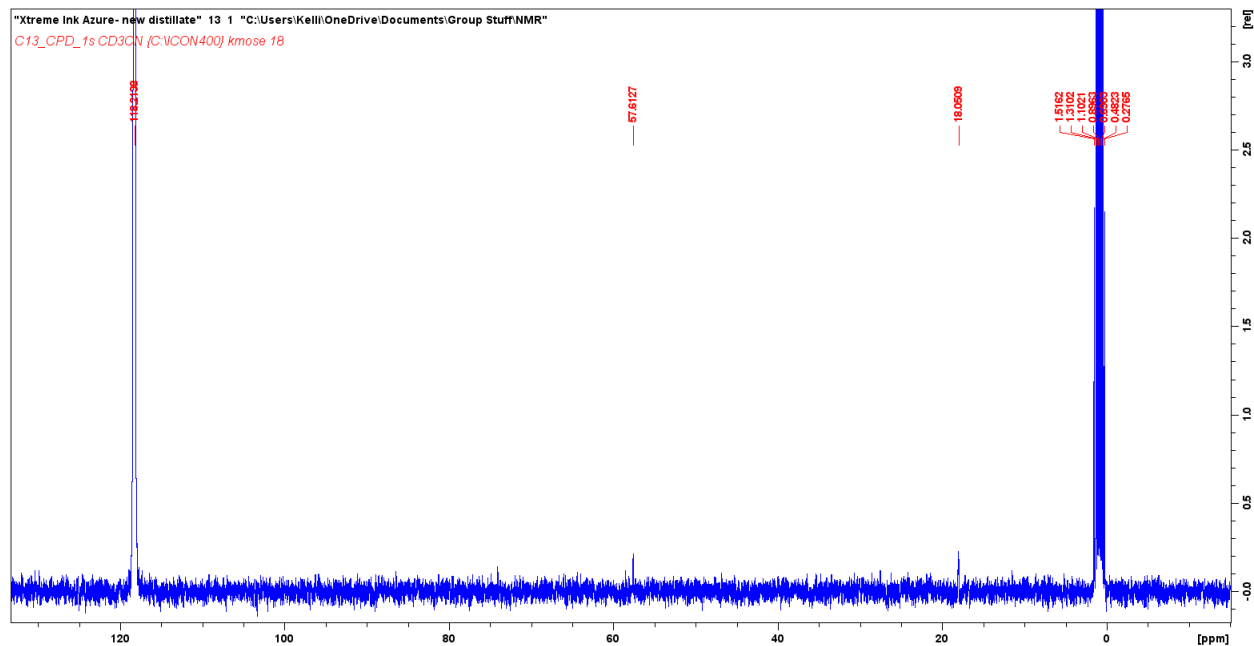

**Figure S38.**  $^{13}\text{C}$  NMR spectrum of Xtreme Ink Azure distillate in acetonitrile- $d_3$

Peaks at  $\delta$ 18.0509 ppm and  $\delta$ 57.6127 ppm are produced by ethanol. The remaining peaks are created by the solvent.

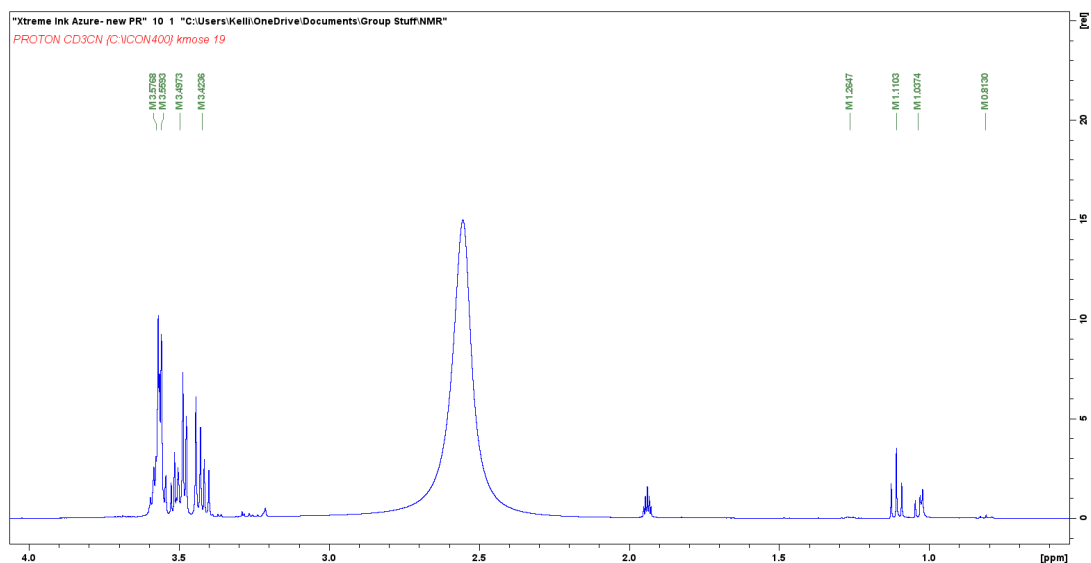

**Figure S39.**  $^1\text{H}$  NMR spectrum of Xtreme Ink Azure pot residue in acetonitrile- $d_3$

Peaks at  $\delta$ 3.4236 ppm,  $\delta$ 3.4973 ppm, and  $\delta$ 3.5768 ppm are produced by glycerol. The triplet up field at  $\delta$ 1.1103 ppm and a peak overlapping with one from glycerol around  $\delta$ 3.57 ppm is likely from ethanol. A singlet at  $\delta$ 3.5593 ppm is likely from polyethylene glycol. Very small peaks appear at  $\delta$ 0.81 ppm (triplet) and  $\delta$ 1.26 ppm (quartet) which are characteristic of a long-chain alkane. The peak at  $\delta$ 1.0374 may be caused by small amounts of propylene glycol.

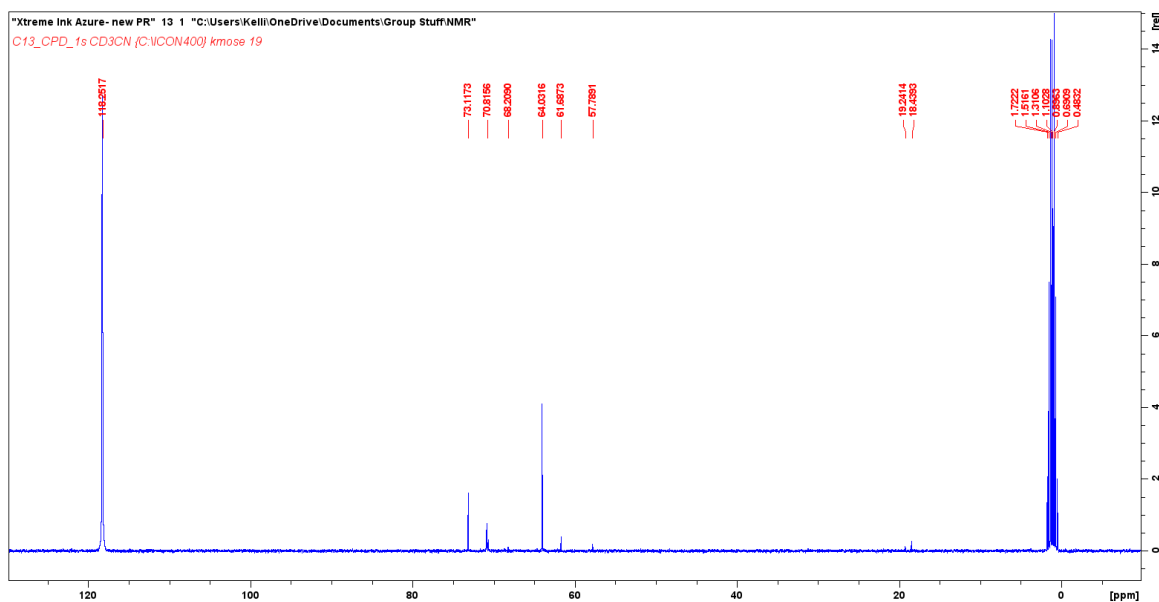

**Figure S40.**  $^{13}\text{C}$  NMR spectrum of Xtreme Ink Azure pot residue in acetonitrile- $d_3$

Ethanol produces the peaks at  $\delta$ 18.4393 ppm and  $\delta$ 57.7891 ppm. Peaks at  $\delta$ 64.0316 ppm and  $\delta$ 73.1173 ppm are produced by glycerol. The peak at  $\delta$ 70.8156 ppm is characteristic of polyethylene glycol. The peaks at  $\delta$ 19.2414 ppm and  $\delta$ 68.2090 ppm are likely produced by propylene glycol. The peak at  $\delta$ 61.6833 ppm remains unidentified.

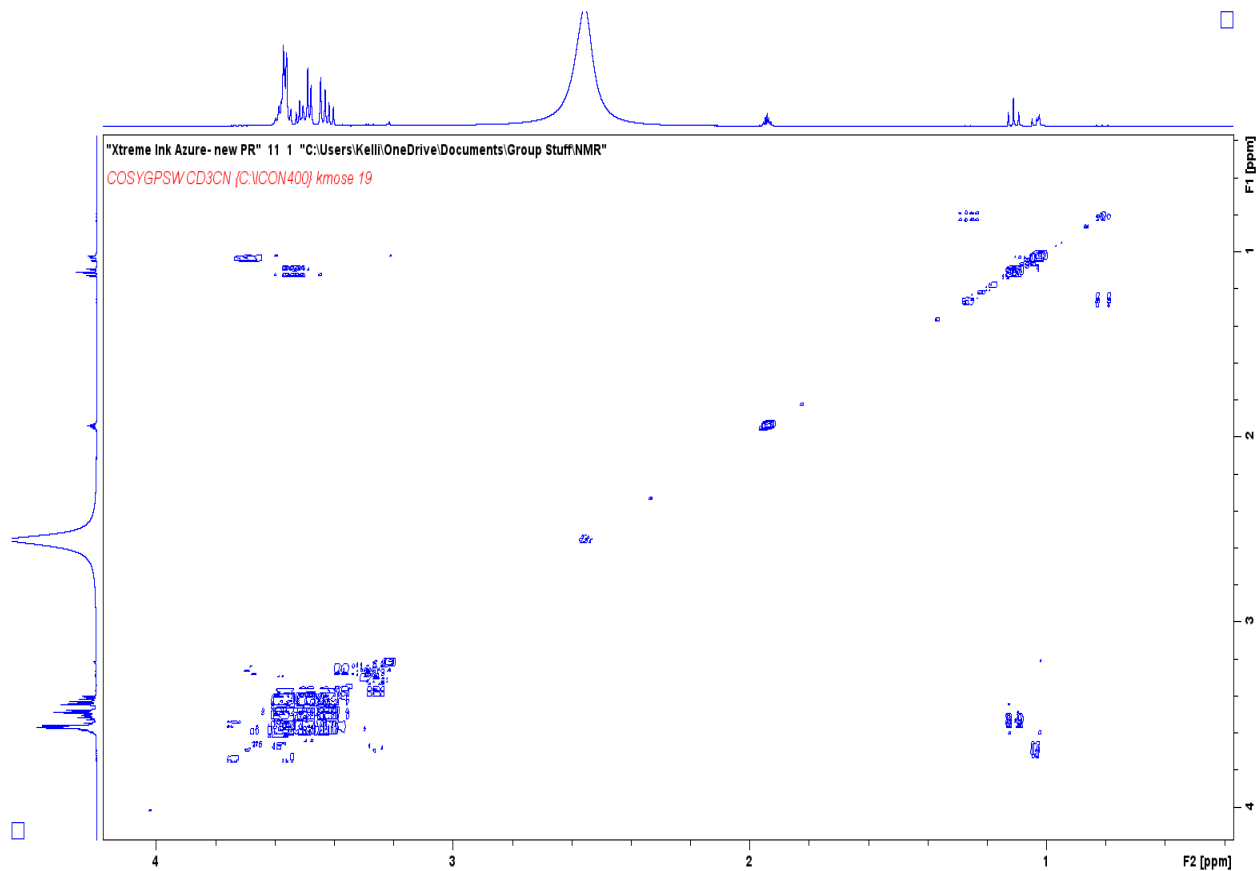

**Figure S41.**  $^1\text{H}$ - $^1\text{H}$  COSY spectrum of Xtreme Ink Azure pot residue in acetonitrile- $d_3$

Coupling occurs between  $\delta$ 0.81 ppm and  $\delta$ 1.2 ppm supports a long-chain alkane being present. Peaks at  $\delta$ 1.1103 ppm and one around  $\delta$ 3.5 ppm show coupling, indicating the presence of ethanol. Glycerol peaks at  $\delta$ 3.4236 ppm,  $\delta$ 3.4973 ppm, and  $\delta$ 3.5768 ppm exhibit coupling. Lastly, minor coupling occurs between small peaks at  $\delta$ 1.0374 ppm,  $\delta$ 3.262 ppm,  $\delta$ 3.381 ppm, and  $\delta$ 3.699 ppm which supports small amounts of propylene glycol being present in this sample.

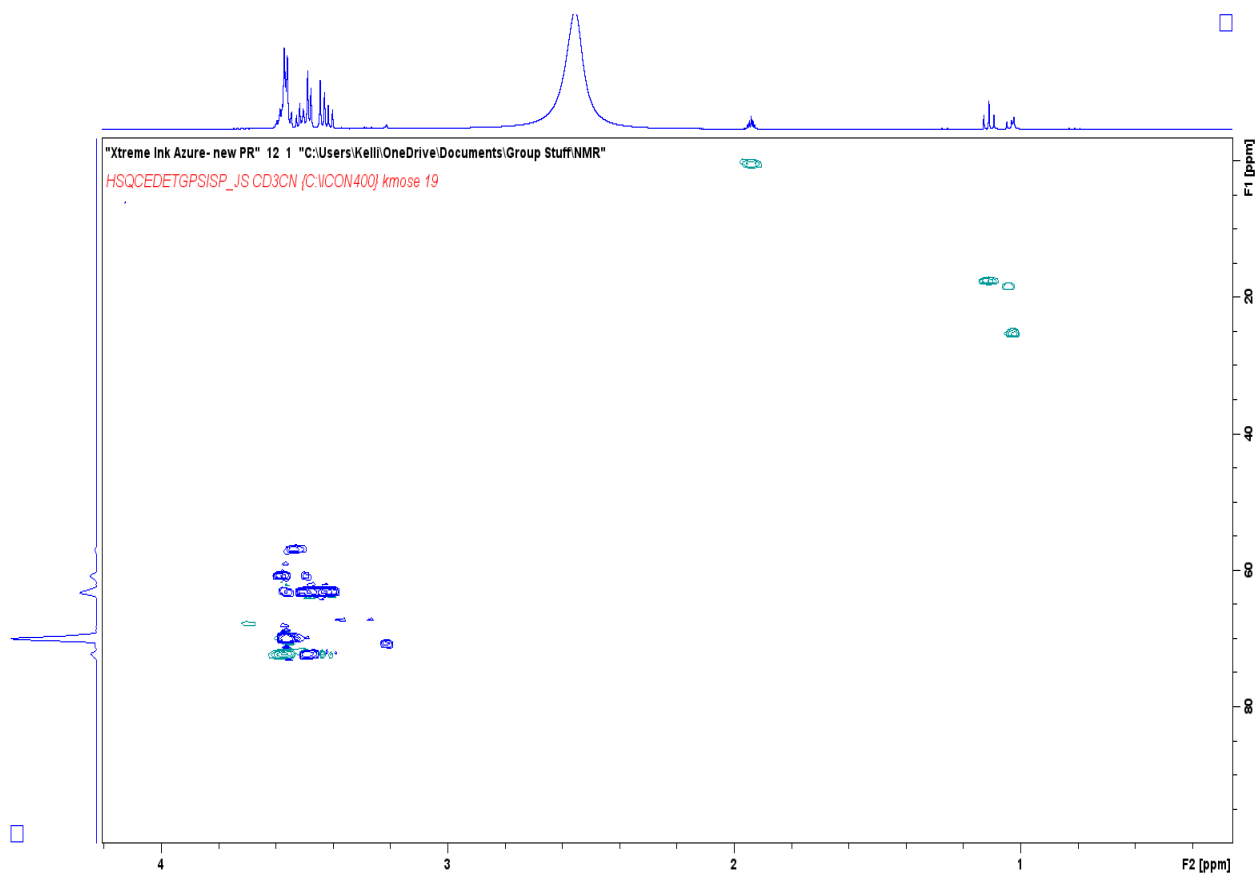

**Figure S42.**  $^1\text{H}$ - $^{13}\text{C}$  HSQC spectrum of Xtreme Ink Azure pot residue in acetonitrile- $d_3$

Coupling between a  $^1\text{H}$  peak at  $\delta 1.1103$  ppm and a  $^{13}\text{C}$  peak at  $\delta 18.4393$  ppm which may indicate ethanol being present. Coupling occurs between the  $^1\text{H}$  peaks at  $\delta 3.4236$  ppm,  $\delta 3.4973$  ppm, and  $\delta 3.5768$  ppm with the  $^{13}\text{C}$  peak at  $\delta 64.0316$  ppm, as well as between the  $^1\text{H}$  peaks at  $\delta 3.4973$  ppm, and  $\delta 3.568$  ppm and the  $^{13}\text{C}$  peak at  $\delta 73.1173$  ppm; this gives strong support of glycerol being in the sample. There appears to be coupling between the  $^1\text{H}$  peak around  $\delta 3.5593$  ppm and the  $^{13}\text{C}$  peak at around  $\delta 70.8156$  ppm, which indicates the presence of polyethylene glycol. Lastly, coupling appears to occur between the  $^1\text{H}$  peak around  $\delta 1.0374$  ppm with the  $^{13}\text{C}$  peak at  $\delta 19.2414$ . This, along with the coupling between small  $^1\text{H}$  peaks at around  $\delta 3.271$  ppm and  $\delta 3.371$  ppm with the  $^{13}\text{C}$  peak at  $\delta 68.209$  ppm, as well as the  $^1\text{H}$  peak at around  $\delta 3.693$  ppm with the  $^{13}\text{C}$  peak around  $\delta 68.5$  ppm supports propylene glycol being in the sample.



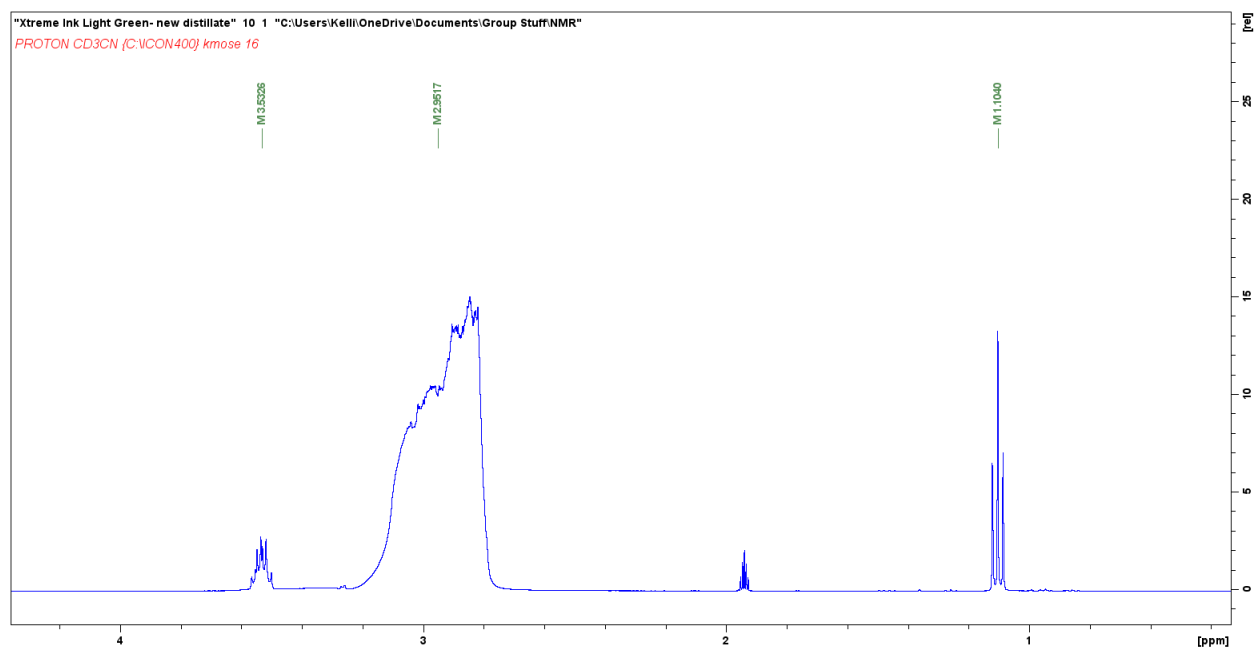

**Figure S43.**  $^1\text{H}$  NMR spectrum of Xtreme Ink Lime Green distillate in acetonitrile- $d_3$

A triplet at  $\delta$ 1.1040 ppm and quartet at  $\delta$ 3.5326 ppm are attributed to ethanol. The large peak at  $\delta$ 2.95 ppm is produced by water while the small peak at  $\delta$ 1.94 ppm is from the solvent.

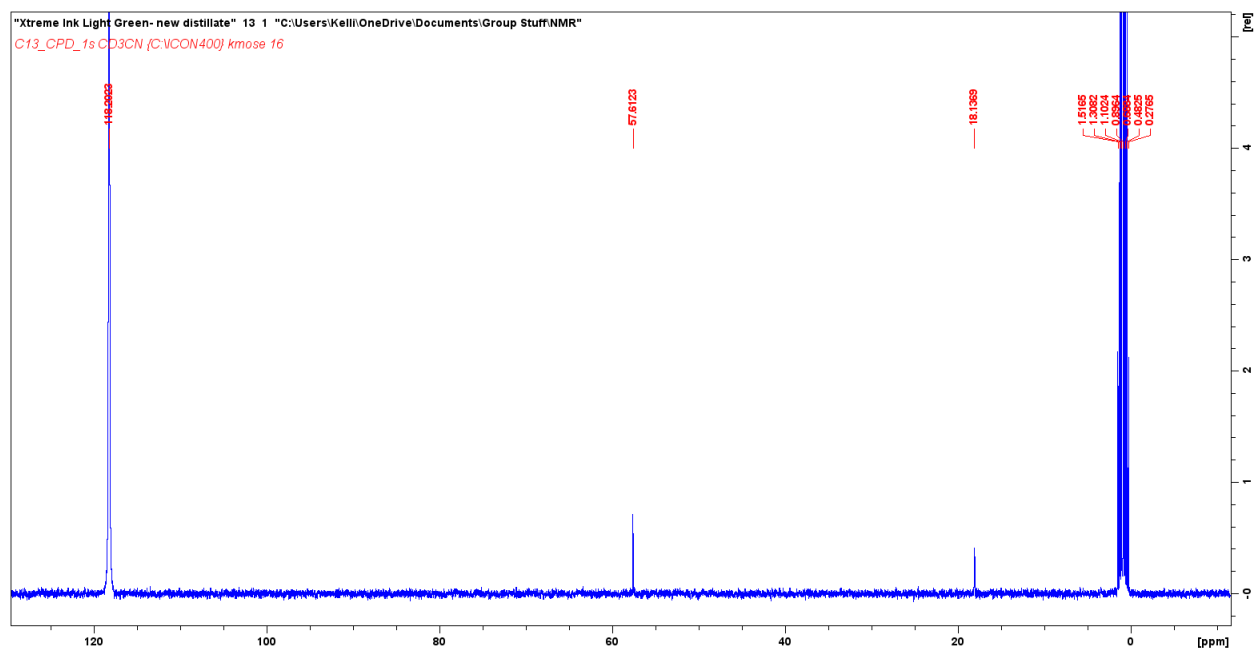

**Figure S44.**  $^{13}\text{C}$  NMR spectrum of Xtreme Ink Lime Green distillate in acetonitrile- $d_3$

Peaks at  $\delta$ 18.1369 ppm and  $\delta$ 57.6123 ppm support ethanol being present in the sample. All other signals are attributed to the solvent.

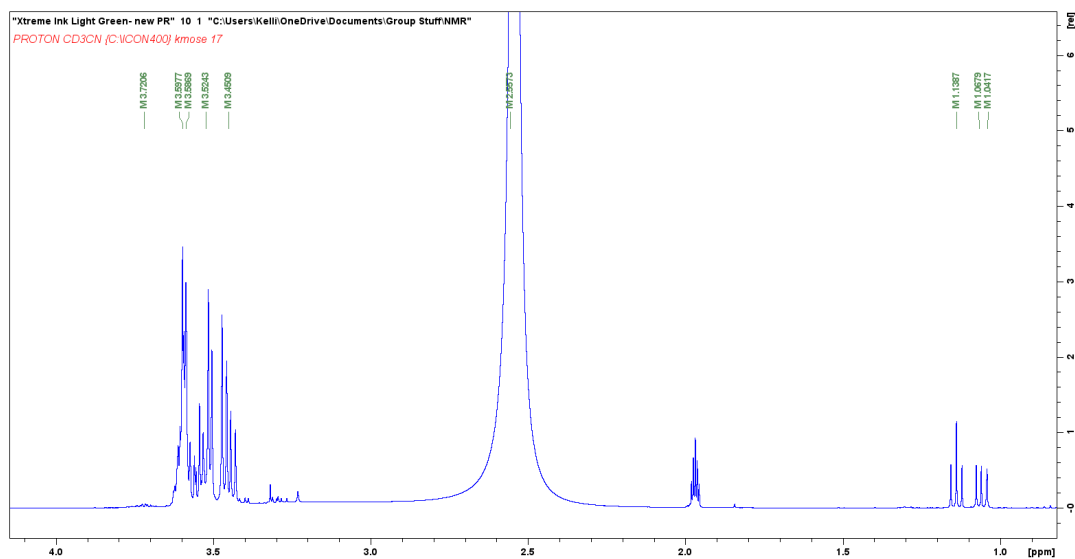

**Figure S45.**  $^1\text{H}$  NMR spectrum of Xtreme Ink Lime Green pot residue in acetonitrile- $d_3$ . Peaks at  $\delta 3.4227$  ppm,  $\delta 3.4961$  ppm, and  $\delta 3.5695$  ppm are produced by glycerol. A triplet at  $\delta 1.1105$  ppm is likely produced by ethanol, although the peak that is expected downfield is apparently masked by the signals from glycerol. There are small peaks at  $\delta 3.2595$  ppm,  $\delta 3.3796$  ppm, and  $\delta 3.6923$  ppm, as well as a prominent doublet at  $\delta 1.0396$  ppm that are characteristic of propylene glycol. A singlet at  $\delta 1.0135$  ppm remains unidentified.

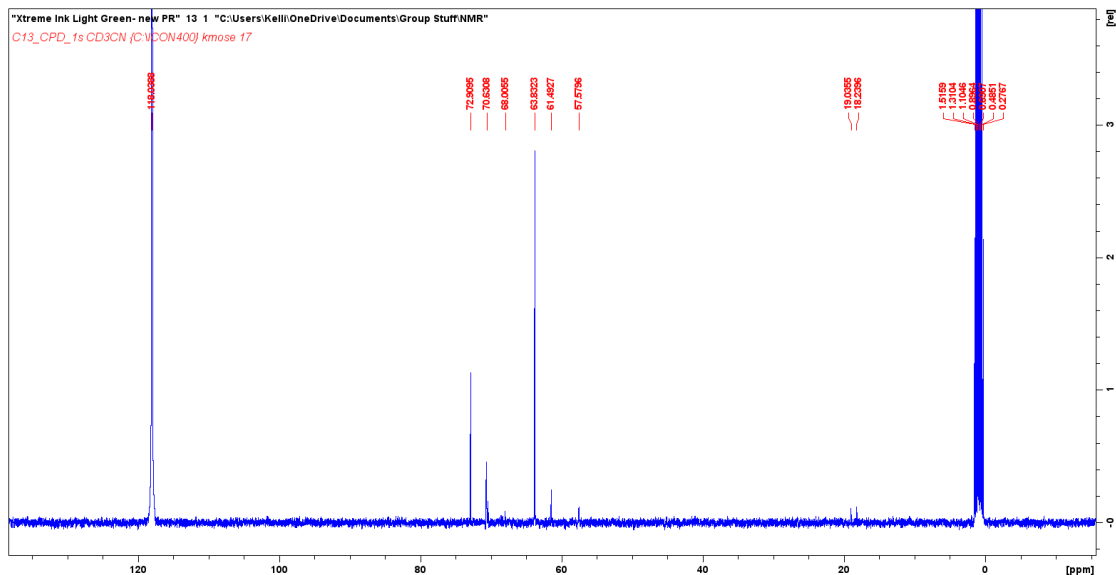

**Figure S46.**  $^{13}\text{C}$  NMR spectrum of Xtreme Ink Lime Green pot residue in acetonitrile- $d_3$ . Ethanol produces signals at  $\delta 18.2396$  ppm and  $\delta 57.5796$  ppm. Propylene glycol shows characteristic peaks at  $\delta 19.0355$  ppm, and  $\delta 68.0055$  ppm; an additional peak would be expected around  $\delta 68$  but does not appear due to low concentration. Peaks at  $\delta 63.8323$  ppm and  $\delta 72.9095$  ppm are attributed to glycerol while the peak at  $\delta 70.5887$  ppm is attributed to polyethylene glycol. The remaining peak at  $\delta 61.1927$  ppm remains unidentified.

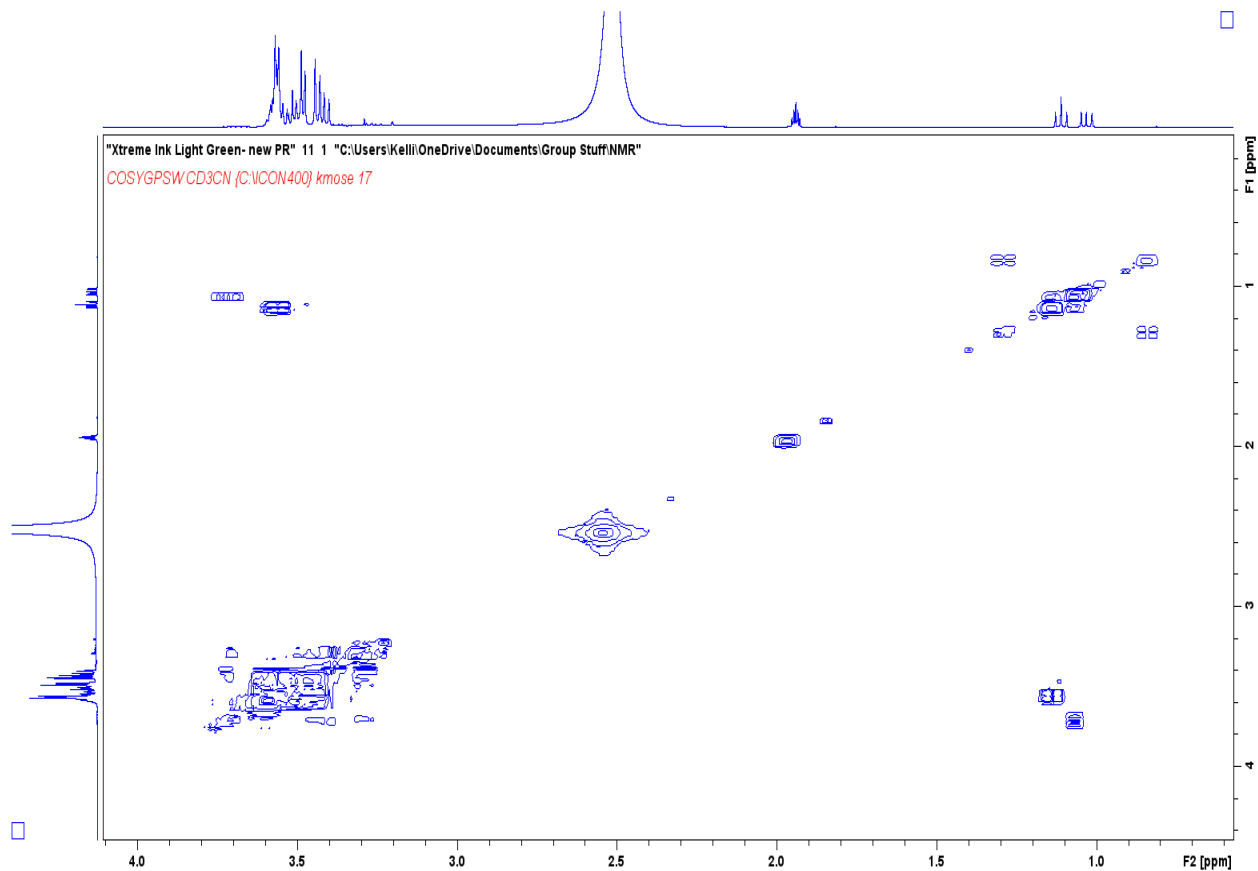

**Figure S47.**  $^1\text{H}$ - $^1\text{H}$  COSY spectrum of Xtreme Ink Lime Green pot residue in acetonitrile- $d_3$ . Coupling between peaks at  $\delta$ 3.4227 ppm,  $\delta$ 3.4961 ppm, and  $\delta$ 3.5695 ppm supports the presence of glycerol. The peak at  $\delta$ 1.1079 ppm couples with a peak around  $\delta$ 3.53 ppm, indicating ethanol in the sample. Small amount of coupling occurring between peaks at  $\delta$ 3.26 ppm,  $\delta$ 3.37 ppm,  $\delta$ 3.70 ppm, and  $\delta$ 1.04 ppm supports the presence of propylene glycol in the ink.

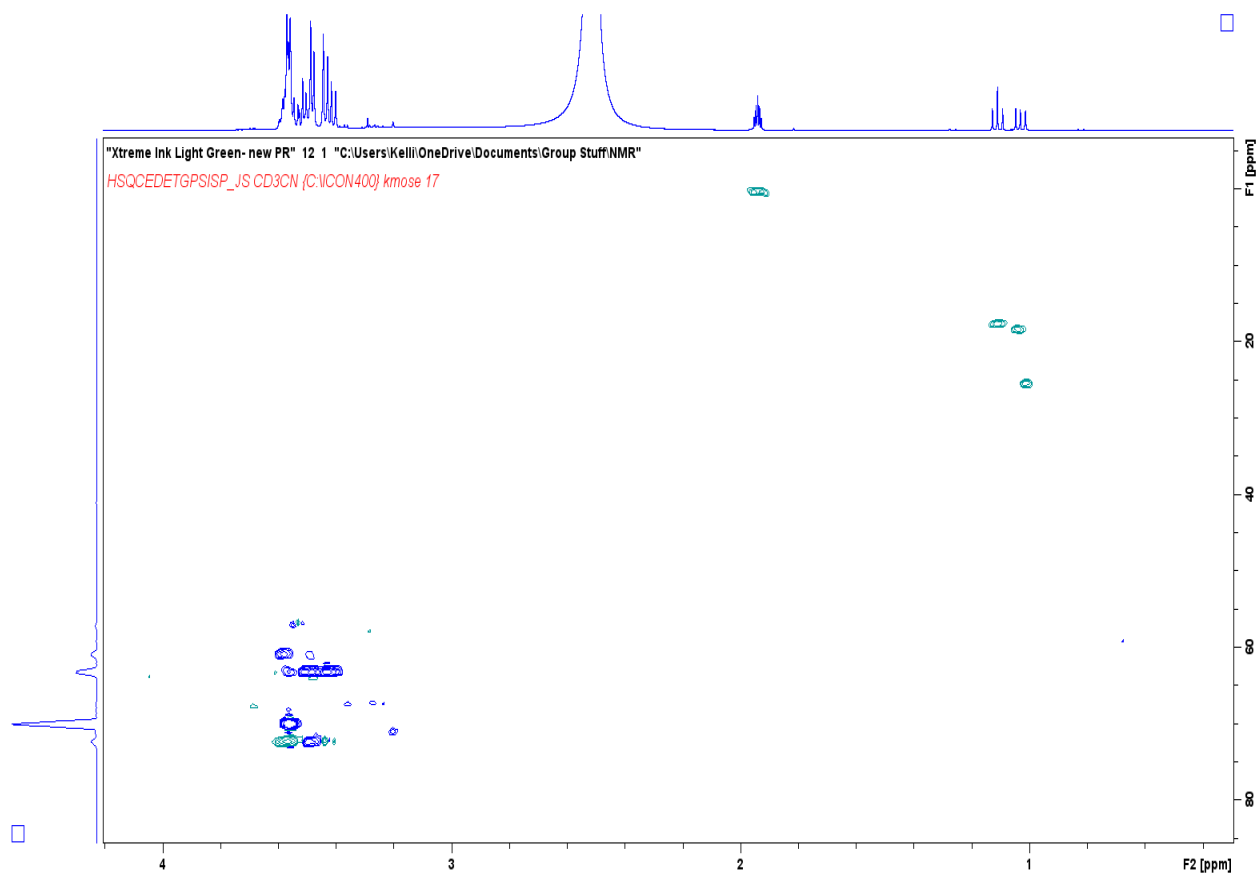

**Figure S48.**  $^1\text{H}$ - $^{13}\text{C}$  HSQC spectrum of Xtreme Ink Lime Green pot residue in acetonitrile- $d_3$

$^1\text{H}$ - $^{13}\text{C}$  coupling occurring between peaks at  $\delta 3.4227$  ppm,  $\delta 3.4961$  ppm, and  $\delta 3.5695$  ppm and those at  $\delta 63.8323$  ppm and  $\delta 72.9095$  ppm support glycerol being present. Additionally, coupling occurs between the  $^1\text{H}$  peaks at  $\delta 1.0396$  ppm,  $\delta 3.273$  ppm,  $\delta 3.365$  ppm, and  $\delta 3.680$  ppm and the  $^{13}\text{C}$  peaks at  $\delta 19.035$  ppm,  $\delta 67.8$  ppm and  $\delta 68.0$  ppm; this supports propylene glycol being in the sample. The coupling  $^1\text{H}$  and  $^{13}\text{C}$  signals at  $\delta 3.5587$  ppm and  $\delta 70.6323$  ppm, respectively, are attributed to polyethylene glycol. Ethanol shows coupling between  $^1\text{H}$  peak at  $\delta 1.1079$  ppm and around  $\delta 3.53$  ppm with  $^{13}\text{C}$  peaks at  $\delta 18.1991$  ppm and  $\delta 57.5955$  ppm, respectively. The remaining peaks remain unidentified.

## 2.5 BioTek

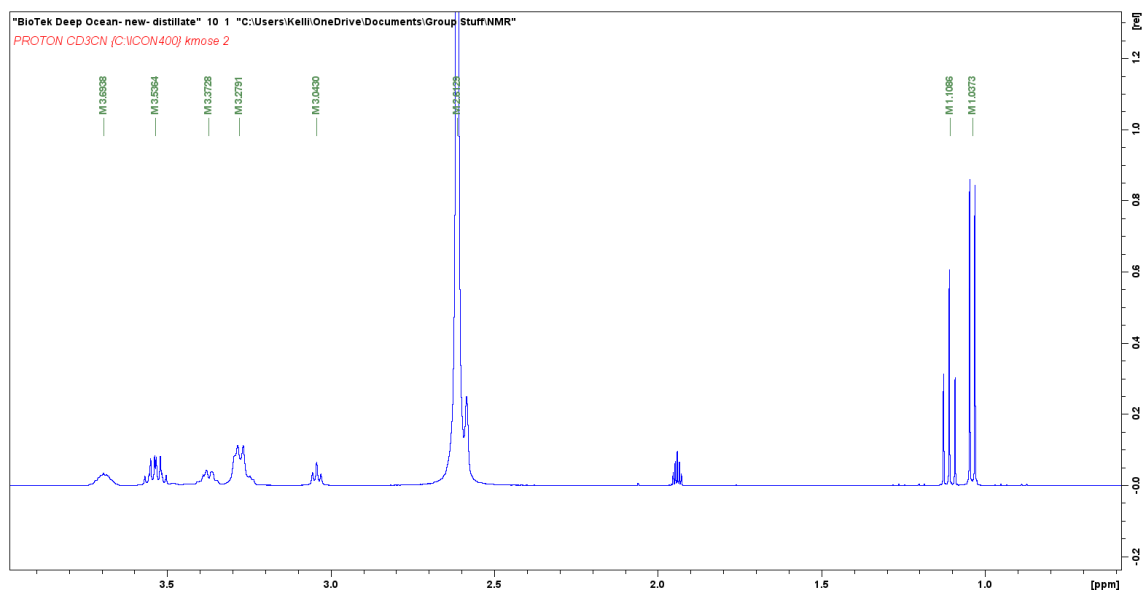

**Figure S49.**  $^1\text{H}$  NMR spectrum of BioTek Deep Ocean ink distillate in acetonitrile- $d_3$

Peaks at  $\delta$  1.1086 ppm,  $\delta$ 3.0430 ppm, and  $\delta$ 3.5364 ppm are produced by ethanol. Propylene glycol produces the signals at  $\delta$ 1.0373 ppm,  $\delta$ 3.2791 ppm,  $\delta$ 3.3728 ppm, and  $\delta$ 3.6939 ppm. Peaks at  $\delta$ 3.6129 ppm and  $\delta$ 1.94 ppm are from water and the acetonitrile solvent, respectively.

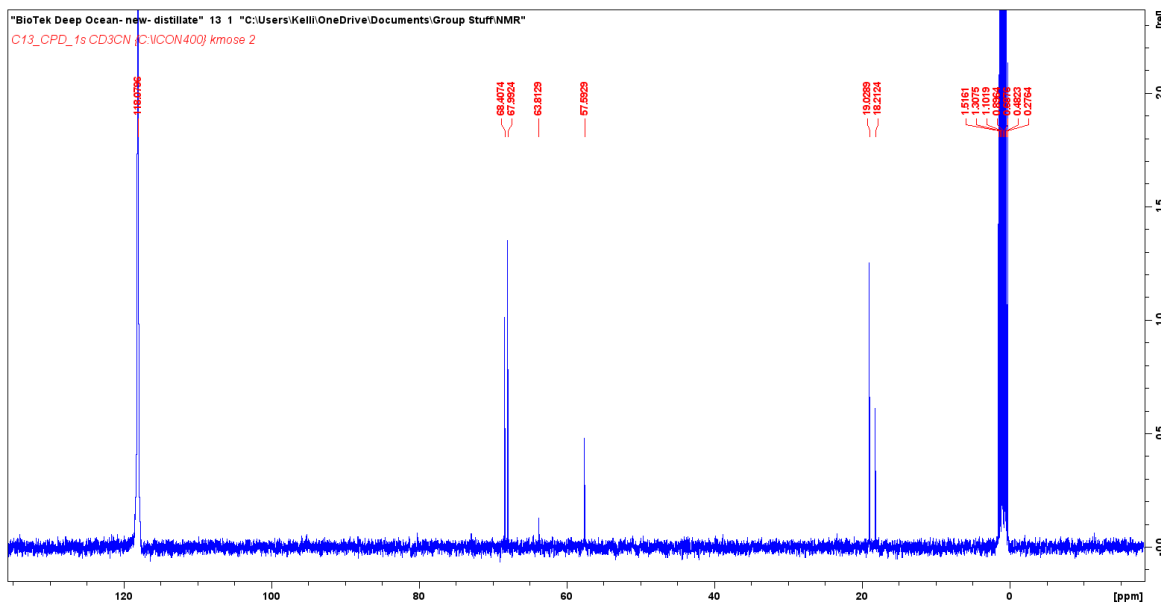

**Figure S50.**  $^{13}\text{C}$  NMR spectrum of BioTek Deep Ocean ink distillate in acetonitrile- $d_3$

Propylene glycol produces signals at  $\delta$ 19.0289 ppm,  $\delta$ 67.9924 ppm, and  $\delta$ 68.1074 ppm. Ethanol produces the signals at  $\delta$ 18.2124 ppm and  $\delta$ 57.5929 ppm. The peak at  $\delta$ 63.8129 ppm is likely from small amounts of glycerol in the distillate.

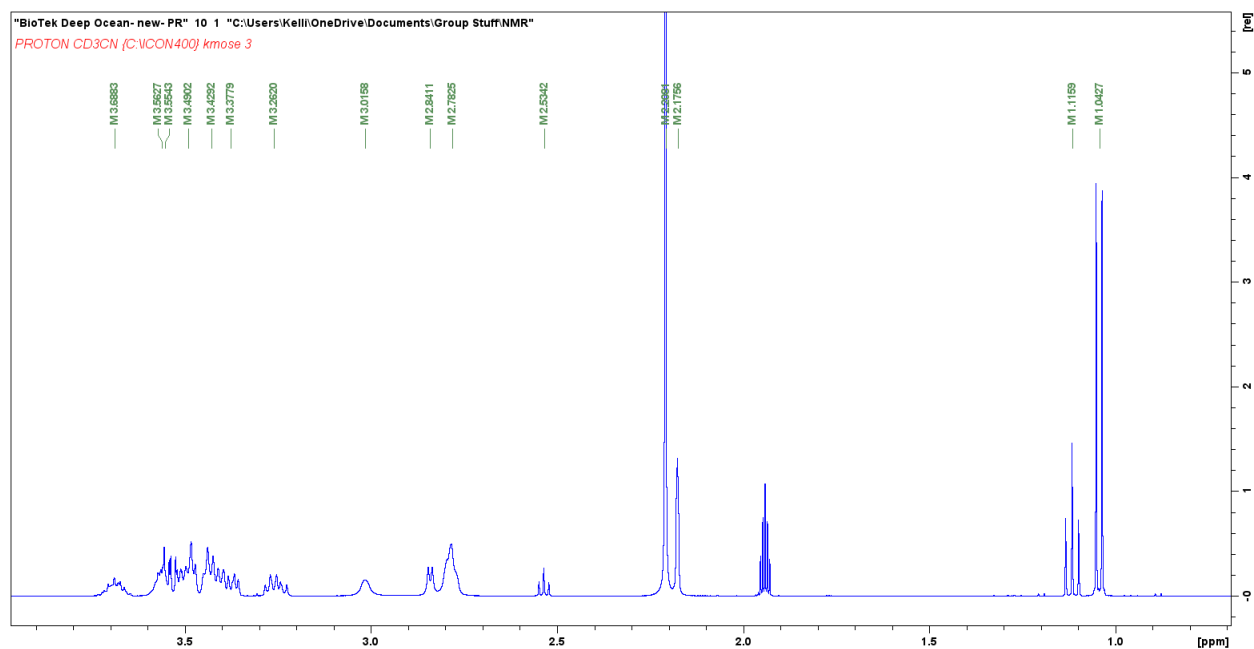

**Figure S51.**  $^1\text{H}$  NMR spectrum of BioTek Deep Ocean ink pot residue in acetonitrile- $d_3$

Peaks at  $\delta$ 1.0427 ppm,  $\delta$ 3.2620 ppm,  $\delta$ 3.3779 ppm,  $\delta$ 3.6883 ppm,  $\delta$ 2.7825 ppm, and  $\delta$ 2.8411 ppm are attributed to propylene glycol, with the latter two peaks produced by the hydroxyl hydrogens. Ethanol produces the peaks at  $\delta$ 1.1159 ppm and  $\delta$ 2.5342 ppm; a third peak is expected around  $\delta$ 3.5 ppm but is masked by other signals. Glycerol peaks appear at  $\delta$ 3.4292 ppm,  $\delta$ 3.4902 ppm, and  $\delta$ 3.5627 ppm. A peak at  $\delta$ 3.5543 ppm is attributed to polyethylene glycol. Peaks at  $\delta$ 2.1756 ppm and  $\delta$ 3.0158 ppm remain unidentified.

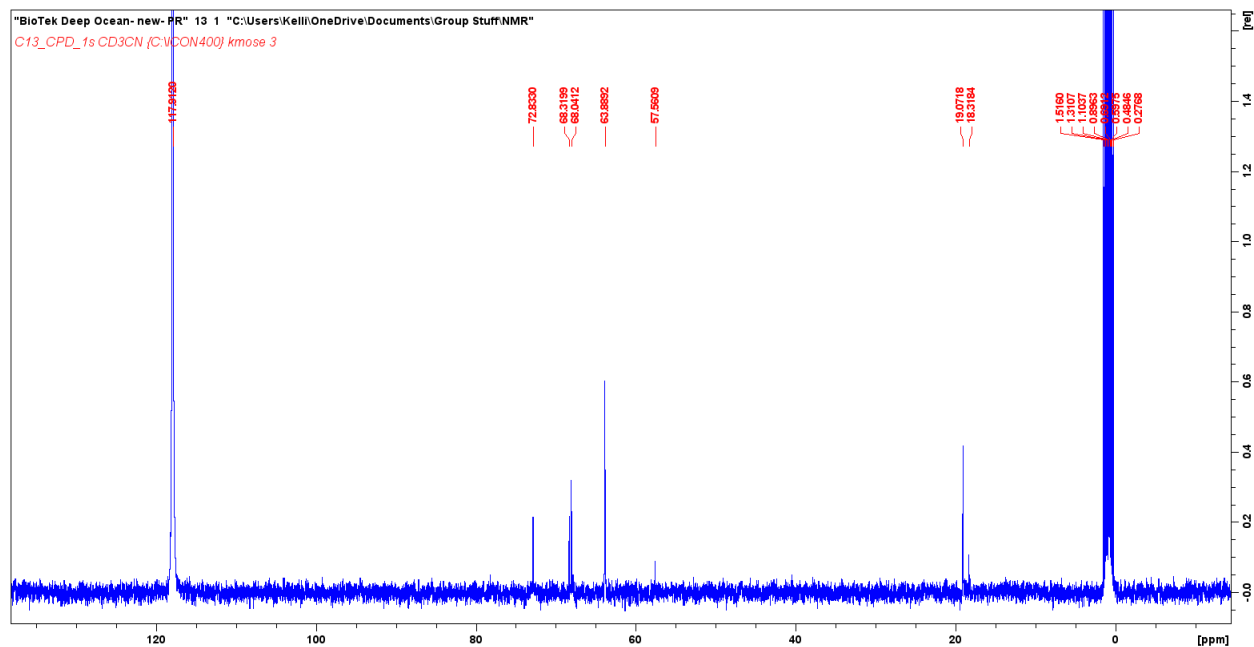

**Figure S52.**  $^{13}\text{C}$  NMR spectrum of BioTek Deep Ocean ink pot residue in acetonitrile- $d_3$

Peaks at  $\delta 63.8892$  ppm and  $\delta 72.8330$  ppm are attributed to glycerol. Propylene glycol produces peaks at  $\delta 19.0718$  ppm,  $\delta 68.0412$  ppm, and  $\delta 68.3199$  ppm. Ethanol produces the signals at  $\delta 18.3184$  ppm and  $\delta 57.5609$  ppm. The remaining peaks are from acetonitrile.

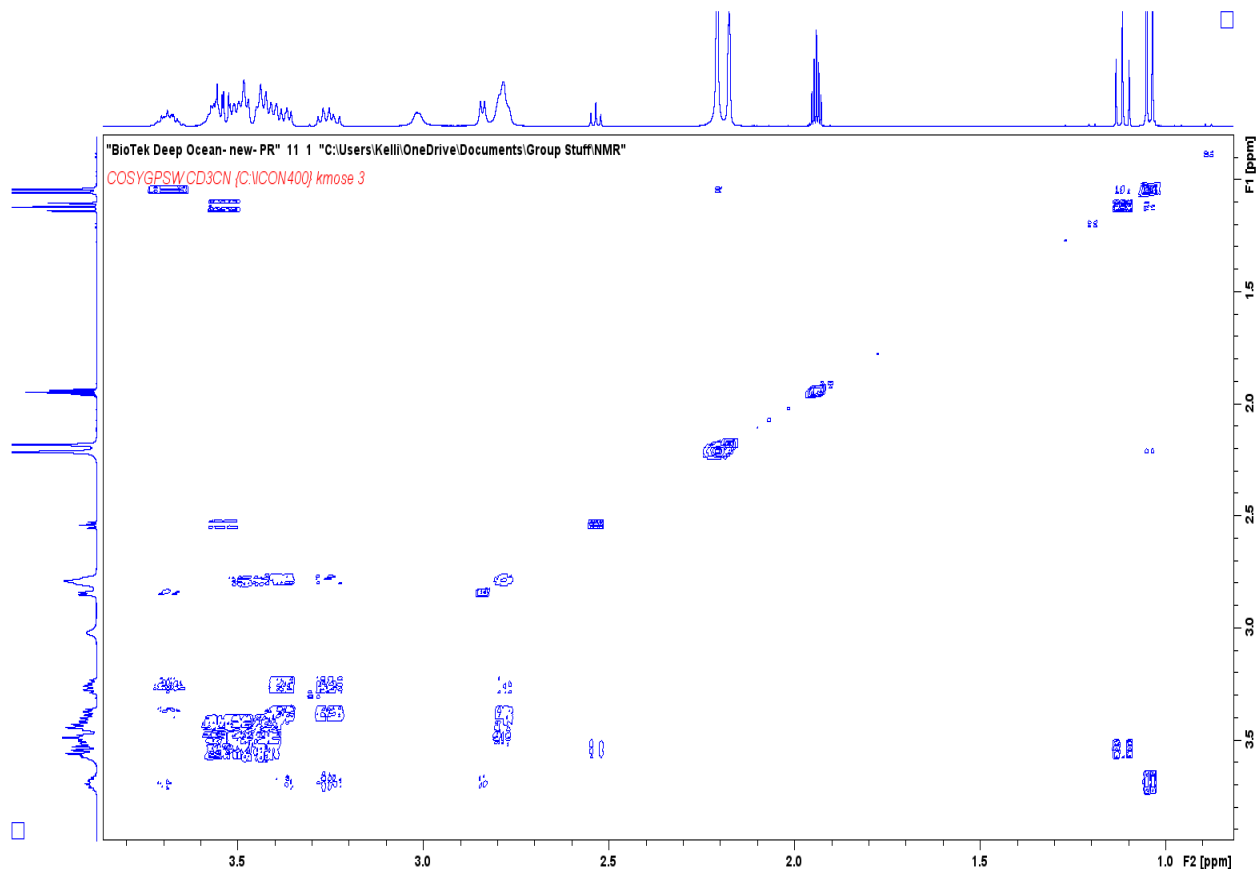

**Figure S53.**  $^1\text{H}$ - $^1\text{H}$  COSY spectrum of BioTek Deep Ocean ink pot residue in acetonitrile- $d_3$

Coupling occurring between peaks at  $\delta 1.0427$  ppm,  $\delta 2.7825$  ppm,  $\delta 2.8411$  ppm,  $\delta 3.2620$  ppm,  $\delta 3.3779$  ppm, and  $\delta 3.6883$  ppm supports propylene glycol being in the sample. Additionally, coupling occurs between peaks at  $\delta 3.4292$  ppm,  $\delta 3.4902$  ppm, and  $\delta 3.5627$  ppm supporting the presence of glycerol. Lastly, coupling between peaks at  $\delta 1.1159$  ppm and  $\delta 2.5342$  ppm indicates ethanol being present.

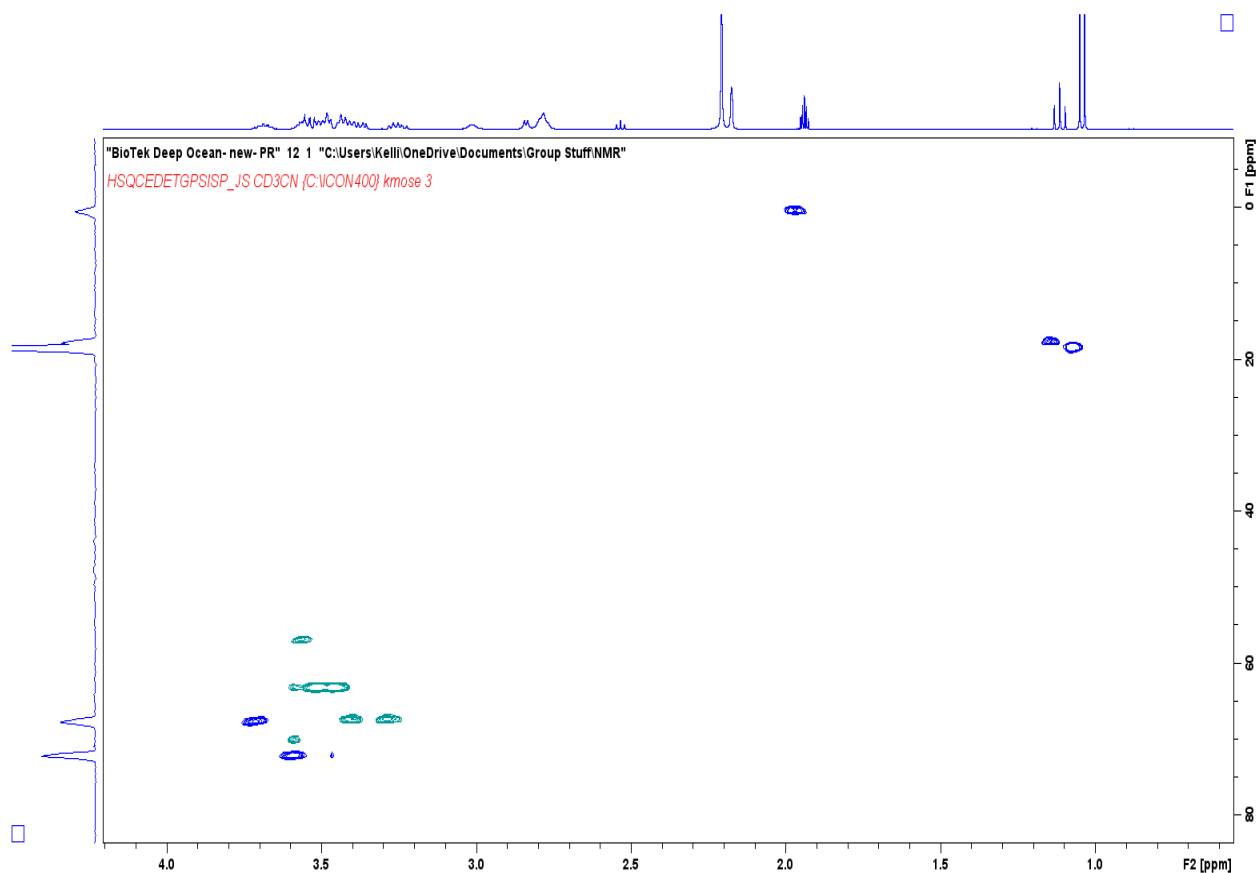

**Figure S54.**  $^1\text{H}$ - $^{13}\text{C}$  HSQC spectrum of BioTek Deep Ocean ink pot residue in acetonitrile- $d_3$

There is coupling between  $^1\text{H}$  peaks at  $\delta$ 3.2620 ppm,  $\delta$ 3.3779 ppm, and  $\delta$ 3.6907 ppm and  $^{13}\text{C}$  peaks at  $\delta$ 68.0412 ppm, and  $\delta$ 68.3199 ppm, as well as the doublet at  $\delta$ 1.0427 ppm coupling with the  $^{13}\text{C}$  peak at  $\delta$ 19.0718 ppm further supports propylene glycol being on the sample.

Glycerol exhibits coupling between  $^1\text{H}$  peaks at  $\delta$ 3.4292 ppm,  $\delta$ 3.4902 ppm, and  $\delta$ 3.5627 ppm and  $^{13}\text{C}$  peaks at  $\delta$ 63.8892 ppm and  $\delta$ 72.8330 ppm. Ethanol  $^1\text{H}$  peaks at  $\delta$ 1.0427 ppm and  $\delta$ 3.534 ppm couple with  $^{13}\text{C}$  peaks at  $\delta$ 18.3184 ppm, and  $\delta$ 57.5609 ppm, respectively.

Polyethylene glycol



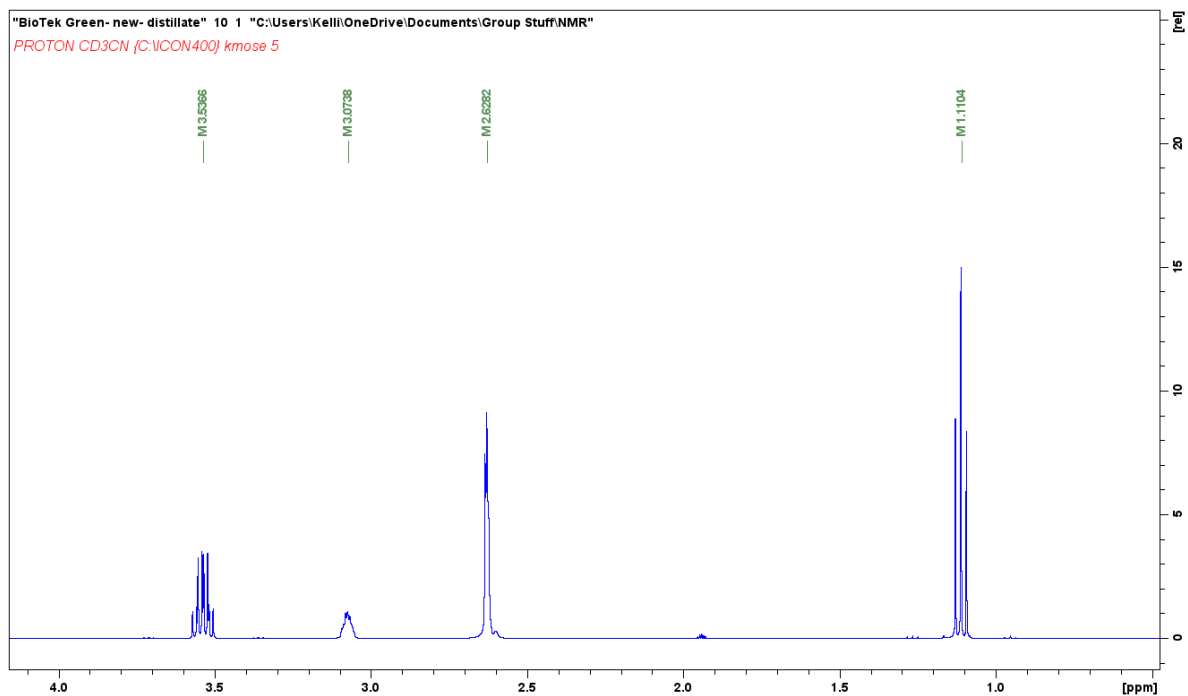

**Figure S55.**  $^1\text{H}$  NMR spectrum of BioTek Green ink distillate in acetonitrile- $d_3$ . Peaks at  $\delta$ 1.1104 ppm,  $\delta$ 3.0738 ppm, and  $\delta$ 3.5366 ppm are attributed to ethanol. The peak at  $\delta$ 2.62 ppm and  $\delta$ 1.94 ppm are produced by water and the acetonitrile solvent, respectively.

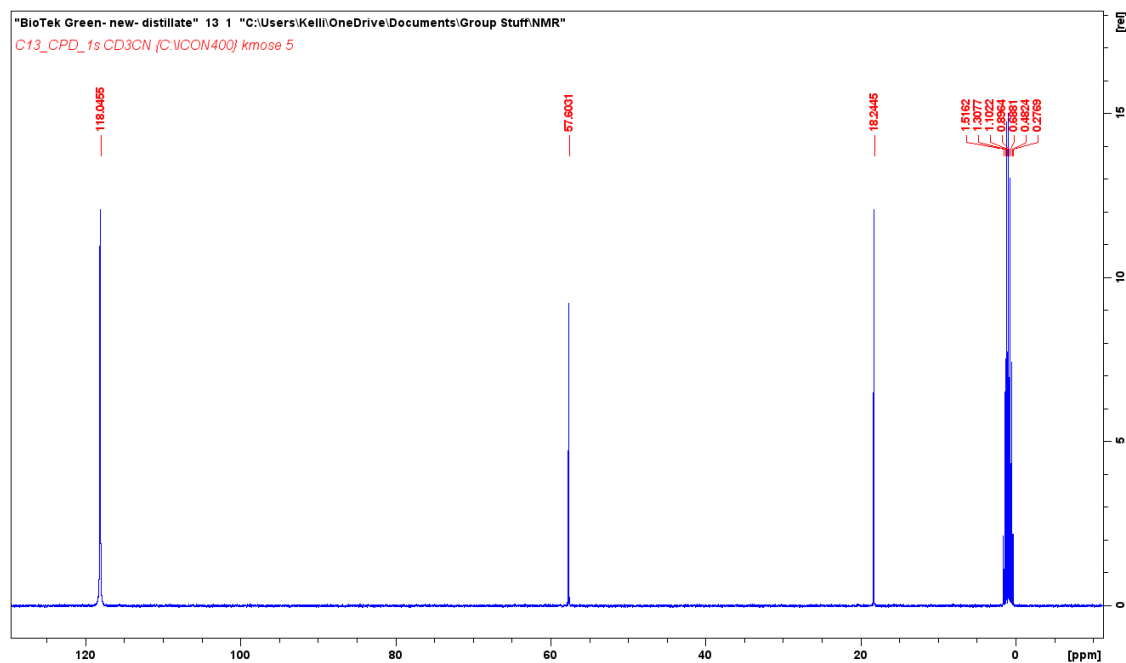

**Figure S56.**  $^{13}\text{C}$  NMR spectrum of BioTek Green ink distillate in acetonitrile- $d_3$ . Ethanol produced the signals at  $\delta$ 18.2445 ppm and  $\delta$ 57.6031 ppm. The remaining peaks are produced by the solvent.

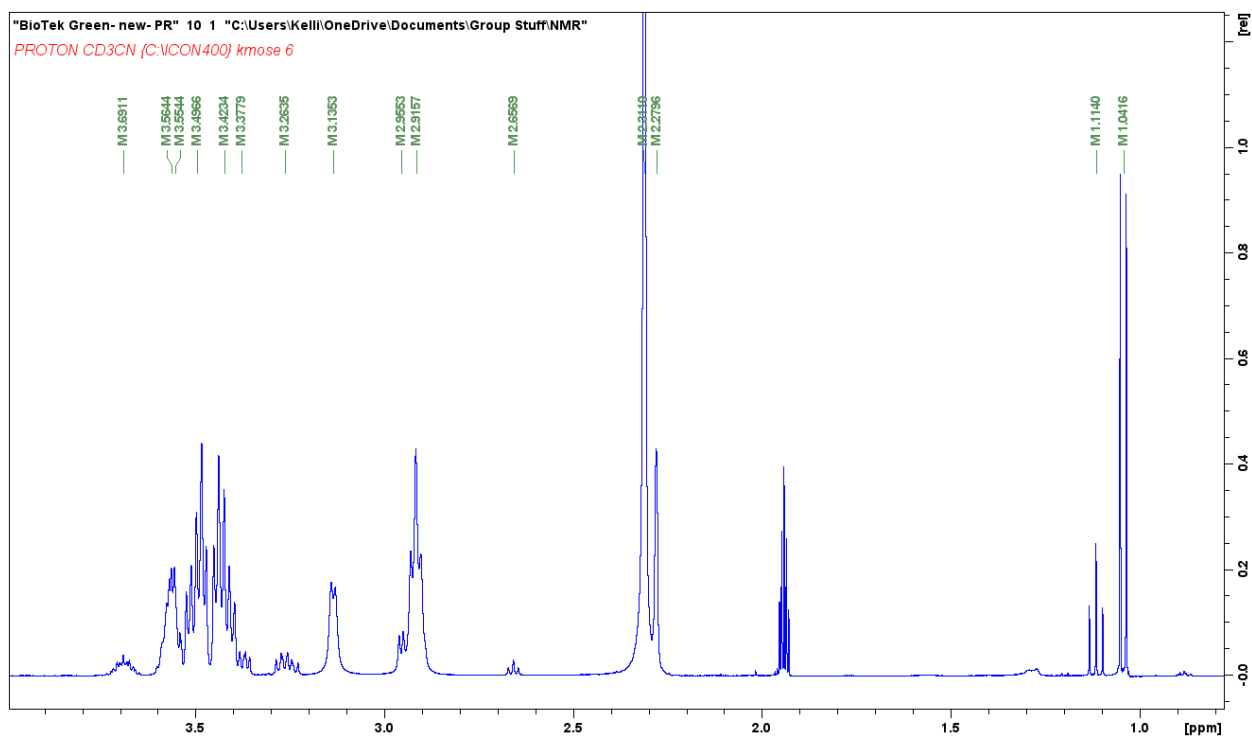

**Figure S57.**  $^1\text{H}$  NMR spectrum of BioTek Green ink pot residue in acetonitrile- $d_3$

Ethanol produces the peaks at  $\delta$  1.1140 ppm and  $\delta$  2.6569 ppm. An additional peak is expected around  $\delta$  3.5 ppm but is overlapping with other signals. Propylene glycol produces peaks at  $\delta$  1.0416 ppm,  $\delta$  2.9553 ppm,  $\delta$  3.2635 ppm,  $\delta$  3.3779 ppm, and  $\delta$  3.6911 ppm. Peaks at  $\delta$  2.9157 ppm,  $\delta$  3.1353 ppm,  $\delta$  3.4234 ppm,  $\delta$  3.4966 ppm, and  $\delta$  3.5644 ppm are attributed to glycerol. A peak at  $\delta$  3.5544 ppm is produced by polyethylene glycol. The large peak at  $\delta$  2.3110 ppm is produced by water. The remaining peak at  $\delta$  2.2796 ppm is unidentified.

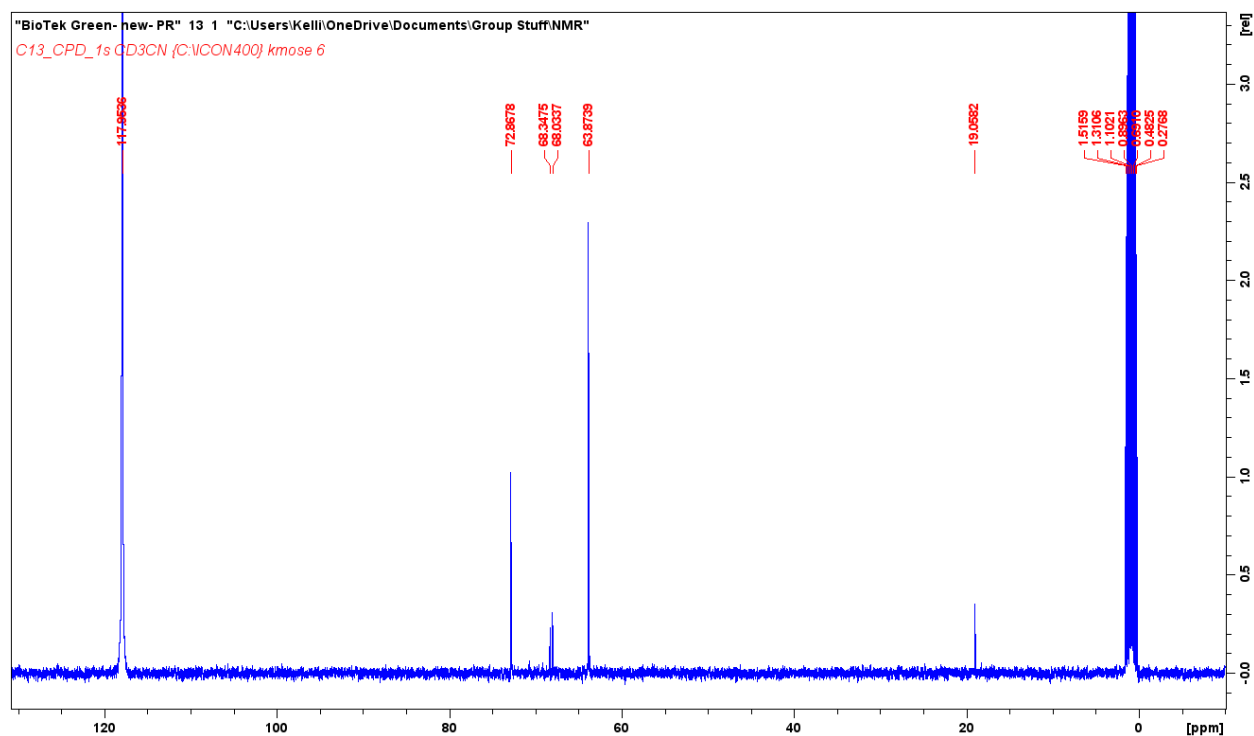

**Figure S58.**  $^{13}\text{C}$  NMR spectrum of BioTek Green ink pot residue in acetonitrile- $d_3$

Peaks appearing at  $\delta$ 19.0582 ppm,  $\delta$ 68.0337 ppm, and  $\delta$ 68.3475 ppm are produced by propylene glycol. Glycerol produces peaks at  $\delta$ 63.8739 ppm and  $\delta$ 72.8678 ppm. Ethanol and polyethylene glycol peaks so not appear due to low concentration.

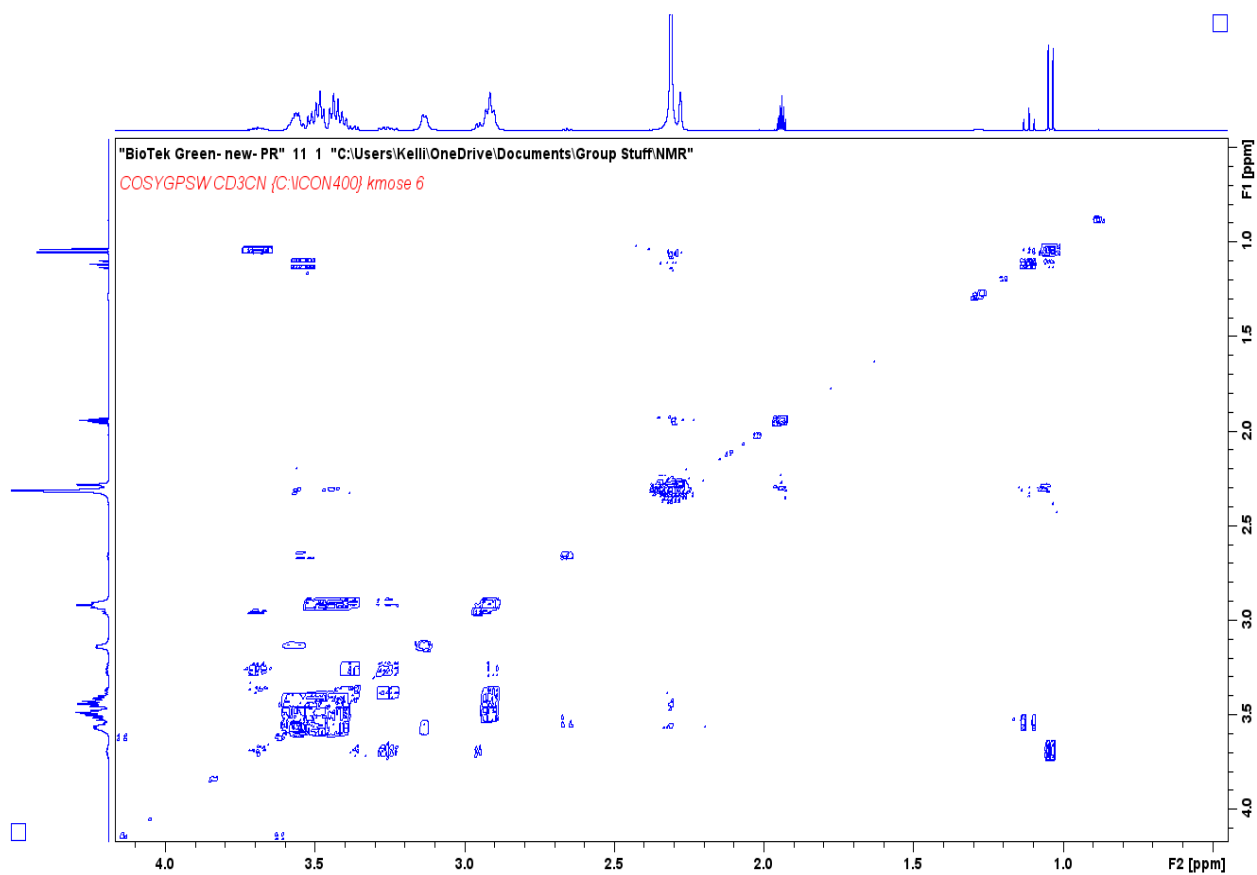

**Figure S59.**  $^1\text{H}$ - $^1\text{H}$  COSY spectrum of BioTek Green ink pot residue in acetonitrile- $d_3$

Propylene glycol peaks at  $\delta$ 1.0416 ppm,  $\delta$ 2.9553 ppm,  $\delta$ 3.2635 ppm,  $\delta$ 3.3779 ppm, and  $\delta$ 3.6911 ppm exhibit  $^1\text{H}$ - $^1\text{H}$  coupling, as well as glycerol peaks at  $\delta$ 2.9157 ppm,  $\delta$ 3.1353 ppm,  $\delta$ 3.4234 ppm,  $\delta$ 3.4966 ppm, and  $\delta$ 3.5644 ppm. Coupling between peaks at  $\delta$ 1.1140 ppm and  $\delta$ 2.6569 ppm support ethanol being in the sample.

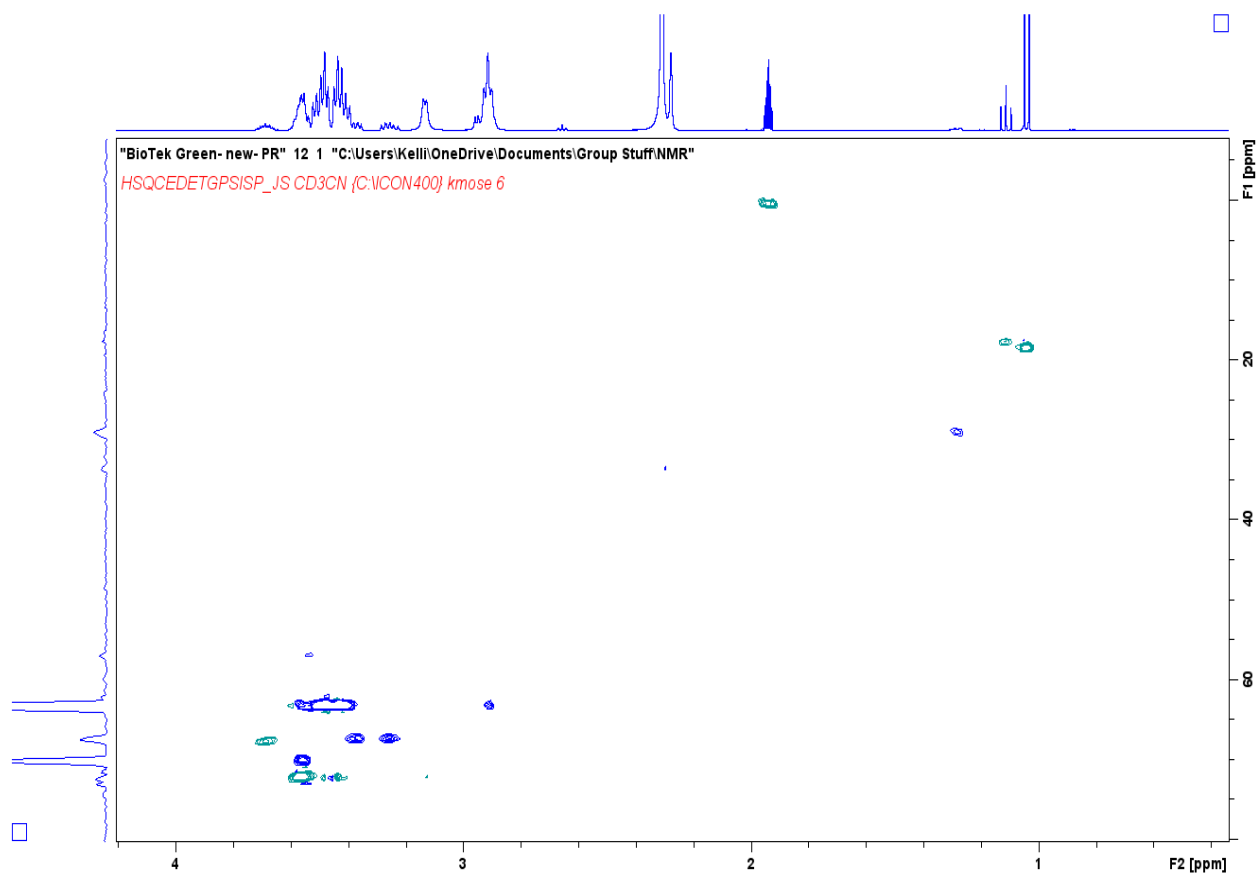

**Figure S60.**  $^1\text{H}$ - $^{13}\text{C}$  HSQC spectrum of BioTek Green ink pot residue in acetonitrile- $d_3$

$^1\text{H}$  peaks at  $\delta 2.9157$  ppm,  $\delta 3.4234$  ppm,  $\delta 3.4966$  ppm, and  $\delta 3.5644$  ppm couple with  $^{13}\text{C}$  peaks at  $\delta 63.8739$  ppm and  $\delta 72.85678$  ppm which indicates the presence of glycerol. Peaks at  $\delta 3.2635$  ppm,  $\delta 3.3779$  ppm couple with the  $^{13}\text{C}$  peak at  $\delta 68.0337$  ppm and the  $^1\text{H}$  peak at  $\delta 3.6911$  ppm couples with the peak at  $\delta 68.3475$  ppm; this along with coupling between signals at  $\delta 1.0416$  ppm and  $\delta 19.0582$  ppm support propylene glycol being present in the sample. Coupling between  $^1\text{H}$  peaks at  $\delta 1.1140$  ppm and  $\delta 3.53$  ppm with  $^{13}\text{C}$  peaks at  $\delta 17.7$  ppm and  $\delta 56.8$  ppm, respectively, supports ethanol being in the sample. Lastly, coupling between the  $^1\text{H}$  peak at  $\delta 3.5544$  ppm and a  $^{13}\text{C}$  peak at  $\delta 70.1$  ppm supports polyethylene glycol being in this ink.

### 3. Raman data

#### 3.1 Intenze GenZ

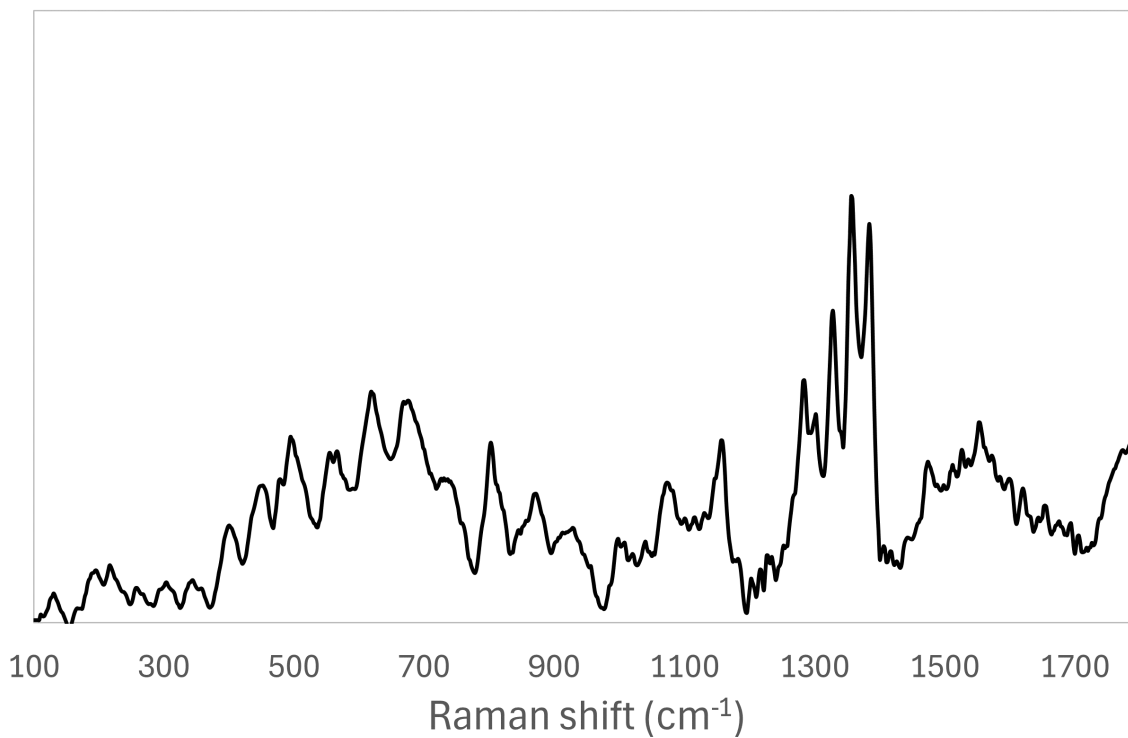

**Figure S61.** Raman spectrum of Intenze GenZ Light Grass ink

Parameters used to obtain this data include the following: 785 nm, 25 mW, 5 second integration, 2 average, 1 boxcar, auto-baseline on. Major peaks at 1384 cm<sup>-1</sup>, 1356 cm<sup>-1</sup>, 1328 cm<sup>-1</sup>, 1284 cm<sup>-1</sup>, and 1158 cm<sup>-1</sup> are characteristic of Pigment Blue 60 (C.I. 69800).

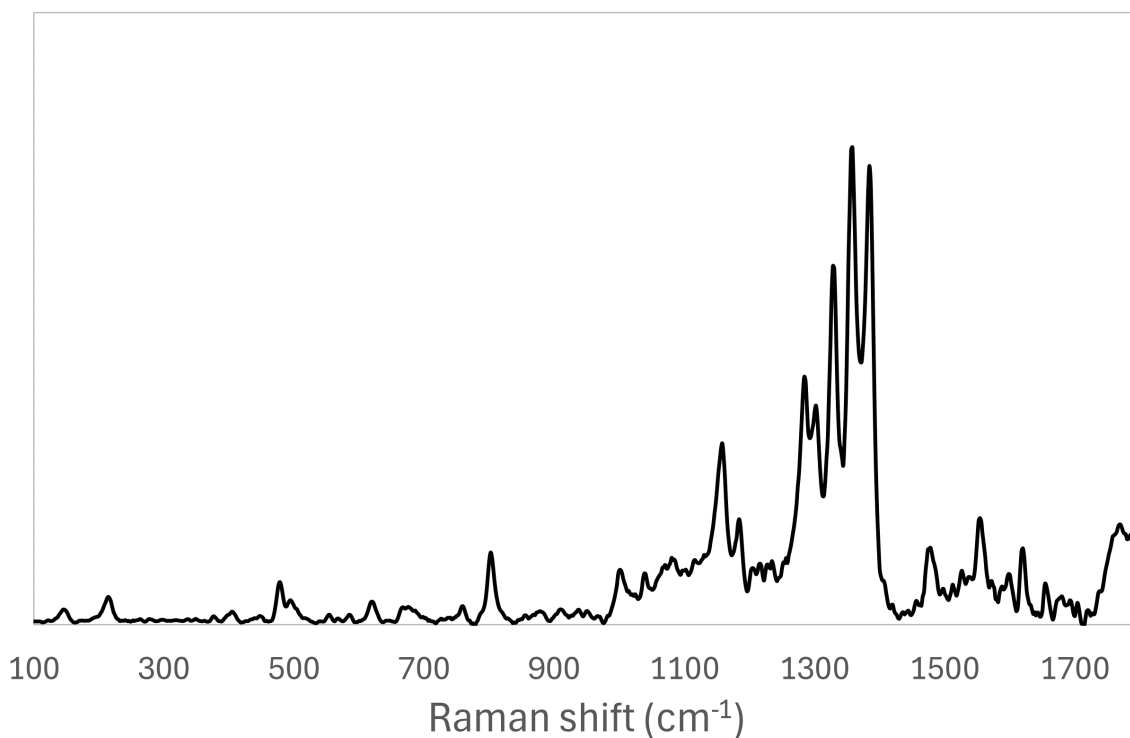

**Figure S62.** Raman spectrum of Intenze GenZ Blue Sky ink

Parameters used to obtain this data include the following: 785 nm, 25 mW, 5 second integration, 2 average, 1 boxcar, auto-baseline on. Characteristic peaks occurring at 1384 cm<sup>-1</sup>, 1358 cm<sup>-1</sup>, 1330 cm<sup>-1</sup>, 1286 cm<sup>-1</sup>, and 1156 cm<sup>-1</sup> match those of Pigment Blue 60 (C.I. 69800).

### 3.2 Dynamic Viking

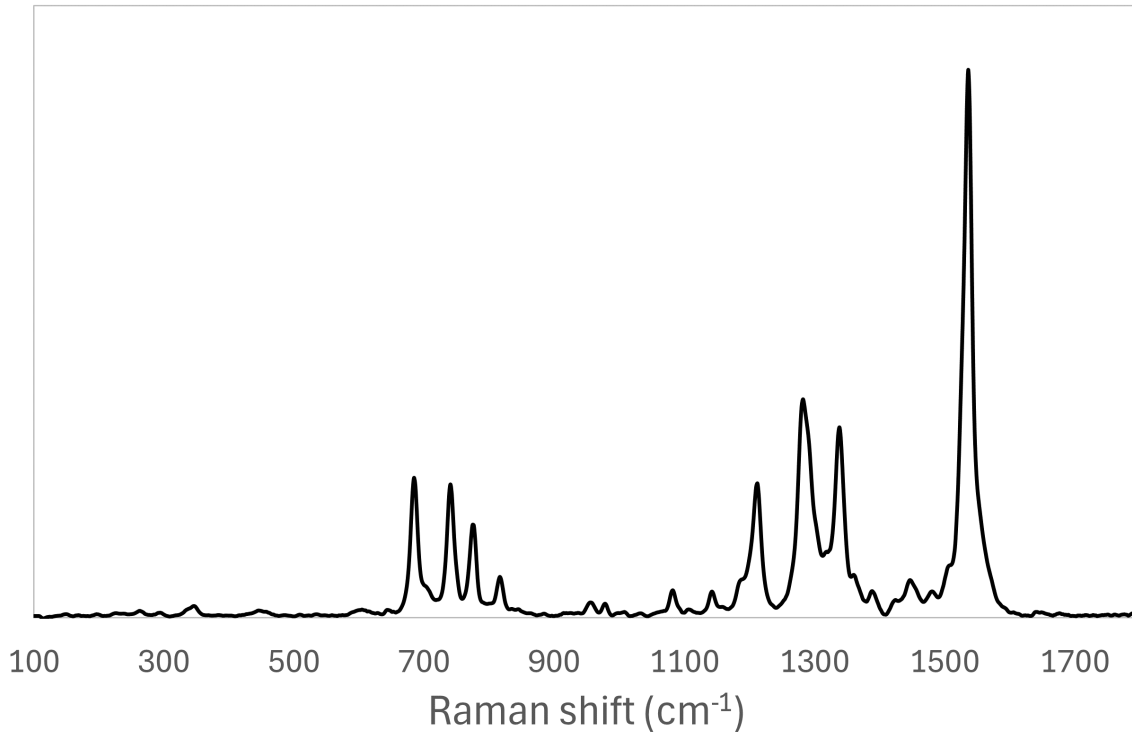

**Figure S63.** Raman spectrum of Dynamic Platinum Baby Blue ink

Parameters used to obtain this data include the following: 785 nm, 50 mW, 5 second integration, 2 average, 1 boxcar, auto-baseline on. Peaks at 1534 cm<sup>-1</sup>, 1336 cm<sup>-1</sup>, 1280 cm<sup>-1</sup>, 1210 cm<sup>-1</sup>, 774 cm<sup>-1</sup>, 738 cm<sup>-1</sup>, and 684 cm<sup>-1</sup> are characteristic of Pigment Green 7.



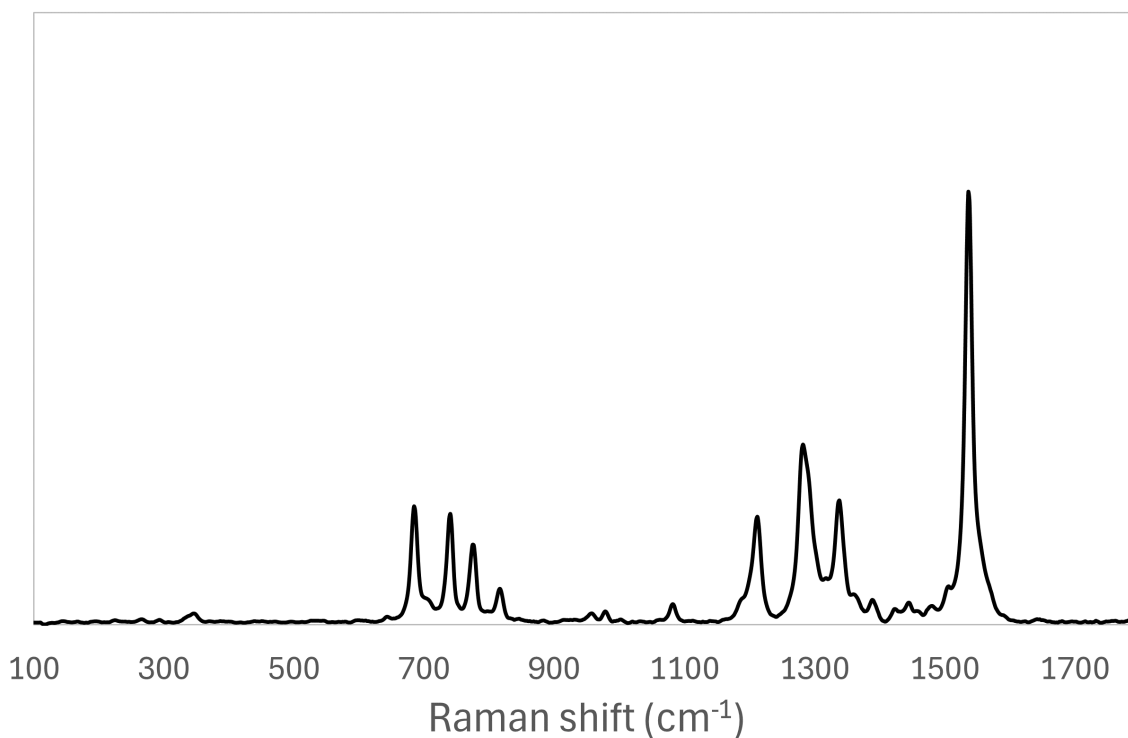

**Figure S64.** Raman spectrum of Dynamic Platinum Emerald Green ink

Parameters used to obtain this data include the following: 785 nm, 50 mW, 5 second integration, 2 average, 1 boxcar, auto-baseline on. Characteristic peaks at 1532 cm<sup>-1</sup>, 1334 cm<sup>-1</sup>, 1278 cm<sup>-1</sup>, 1208 cm<sup>-1</sup>, 774 cm<sup>-1</sup>, 738 cm<sup>-1</sup>, and 684 cm<sup>-1</sup> match those of Pigment Green 7.

### 3.3 Quantum Ink

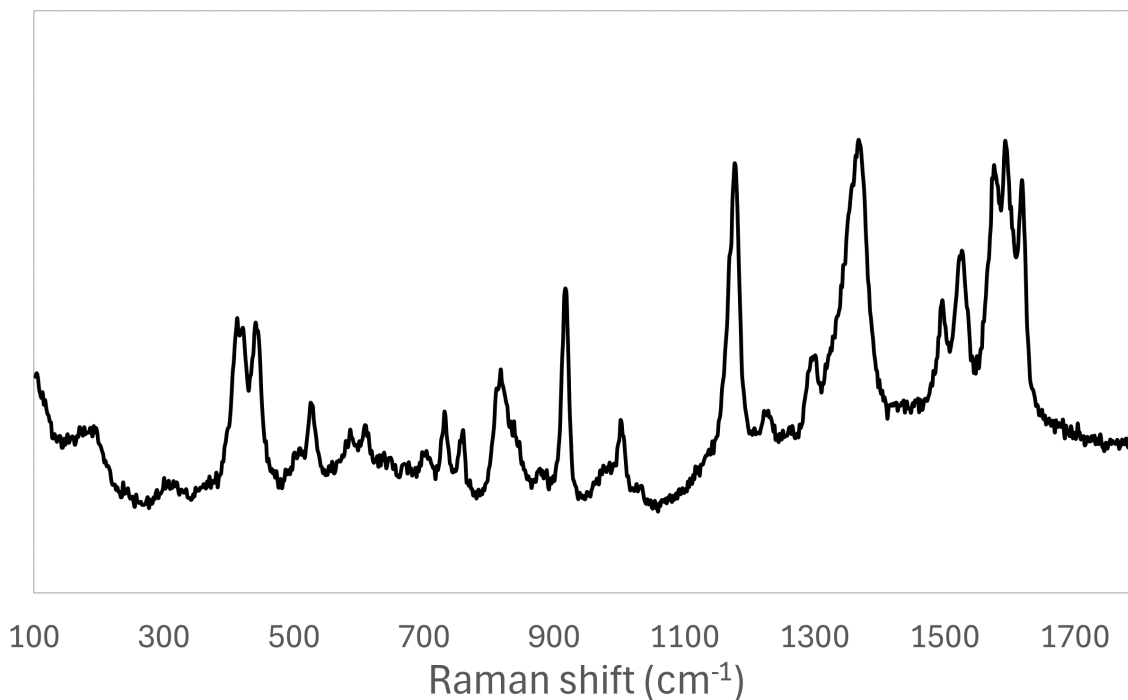

**Figure S65.** Raman spectrum of Quantum Ink Grover

Parameters used to obtain this data include the following: 532 nm, 0.1%, 4 accumulations, 20 second integration. Major peaks occurring at 1619 cm<sup>-1</sup>, 1592 cm<sup>-1</sup>, 1575 cm<sup>-1</sup>, 1526 cm<sup>-1</sup>, 1367 cm<sup>-1</sup>, 1178 cm<sup>-1</sup>, 1003 cm<sup>-1</sup>, 916 cm<sup>-1</sup>, 817 cm<sup>-1</sup>, 526 cm<sup>-1</sup>, 442 cm<sup>-1</sup>, and 412 cm<sup>-1</sup> are characteristic of alkali blue (C.I. 42765).

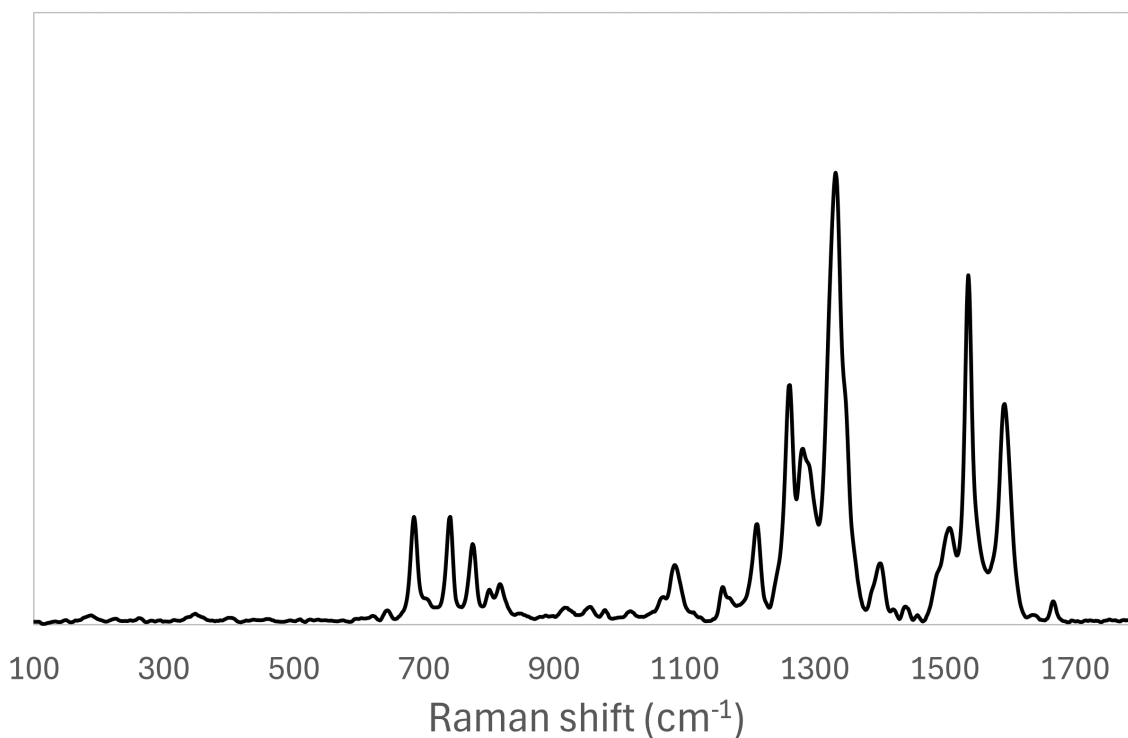

**Figure S66.** Raman spectrum of Quantum Ink Pickle Juice

Parameters used to obtain this data include the following: 785 nm, 50 mW, 5 second integration, 2 average, 1 boxcar, auto-baseline on. Major peaks occur at 1592 cm<sup>-1</sup>, 1536 cm<sup>-1</sup>, 1508 cm<sup>-1</sup>, 1400 cm<sup>-1</sup>, 1332 cm<sup>-1</sup>, 1282 cm<sup>-1</sup>, 1262 cm<sup>-1</sup>, 1212 cm<sup>-1</sup>, 1084 cm<sup>-1</sup>, 774 cm<sup>-1</sup>, 740 cm<sup>-1</sup>, and 684 cm<sup>-1</sup>. These peaks match those from both Pigment Green 7 and Pigment Yellow 74.

### 3.4 Xtreme Ink

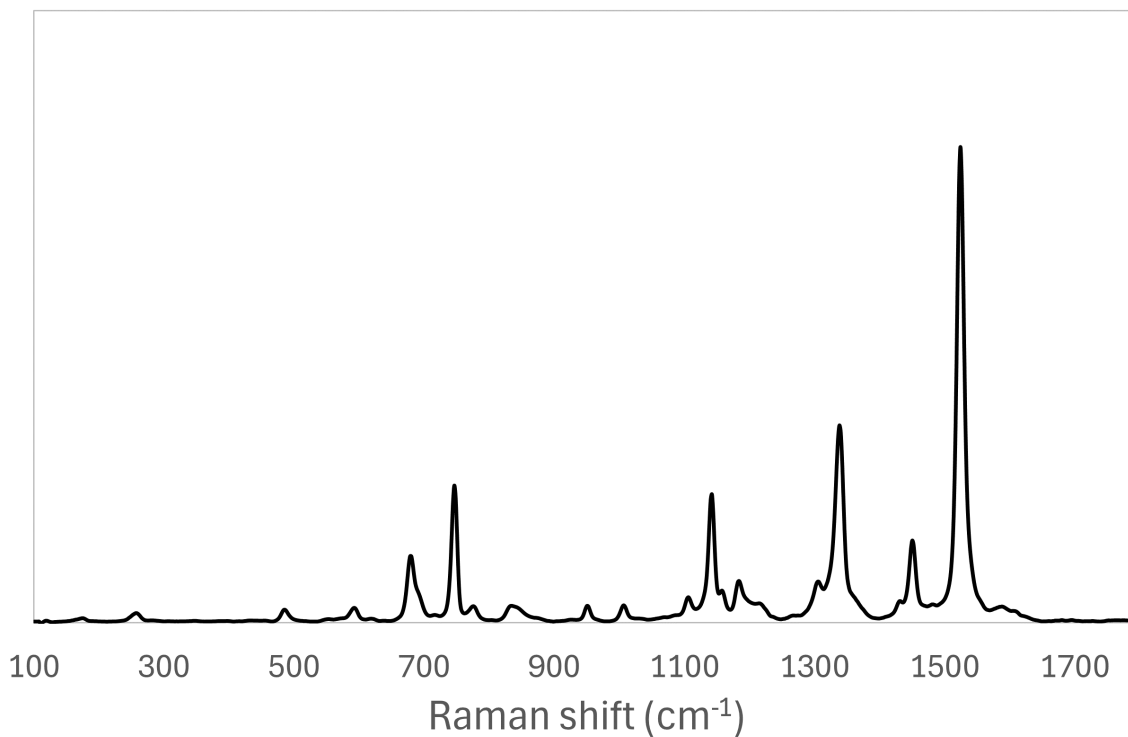

**Figure S67.** Raman spectrum of Xtreme Ink Azure

Parameters used to obtain this data include the following: 785 nm, 50 mW, 5 second integration, 2 average, 1 boxcar, auto-baseline on. Peaks occurring at 1524 cm<sup>-1</sup>, 1450 cm<sup>-1</sup>, 1338 cm<sup>-1</sup>, 1142 cm<sup>-1</sup>, 746 cm<sup>-1</sup>, and 680 cm<sup>-1</sup> match those of Pigment Blue 15.

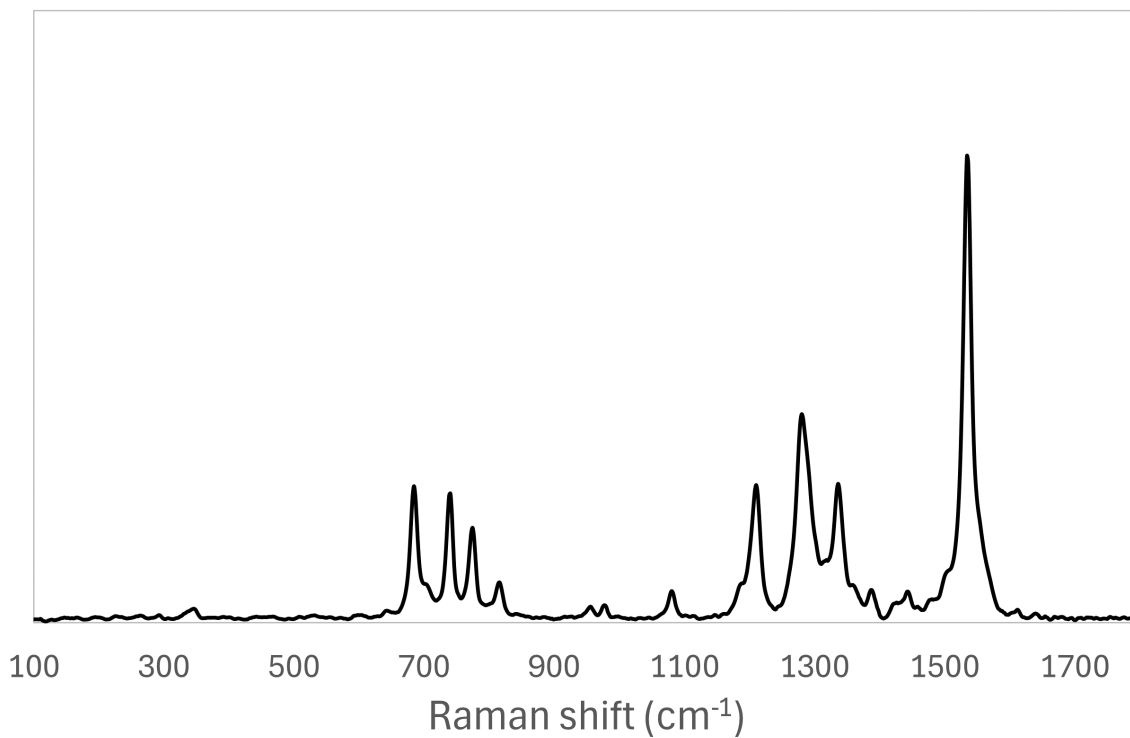

**Figure S68.** Raman spectrum of Xtreme Ink Lime Green

Parameters used to obtain this data include the following: 785 nm, 50 mW, 5 second integration, 2 average, 1 boxcar, auto-baseline on. Characteristic peaks at 1530 cm<sup>-1</sup>, 1382 cm<sup>-1</sup>, 1287 cm<sup>-1</sup>, 1206 cm<sup>-1</sup>, 772 cm<sup>-1</sup>, 738 cm<sup>-1</sup>, and 684 cm<sup>-1</sup> match those produced by Pigment Green 7.

### 3.5 BioTek

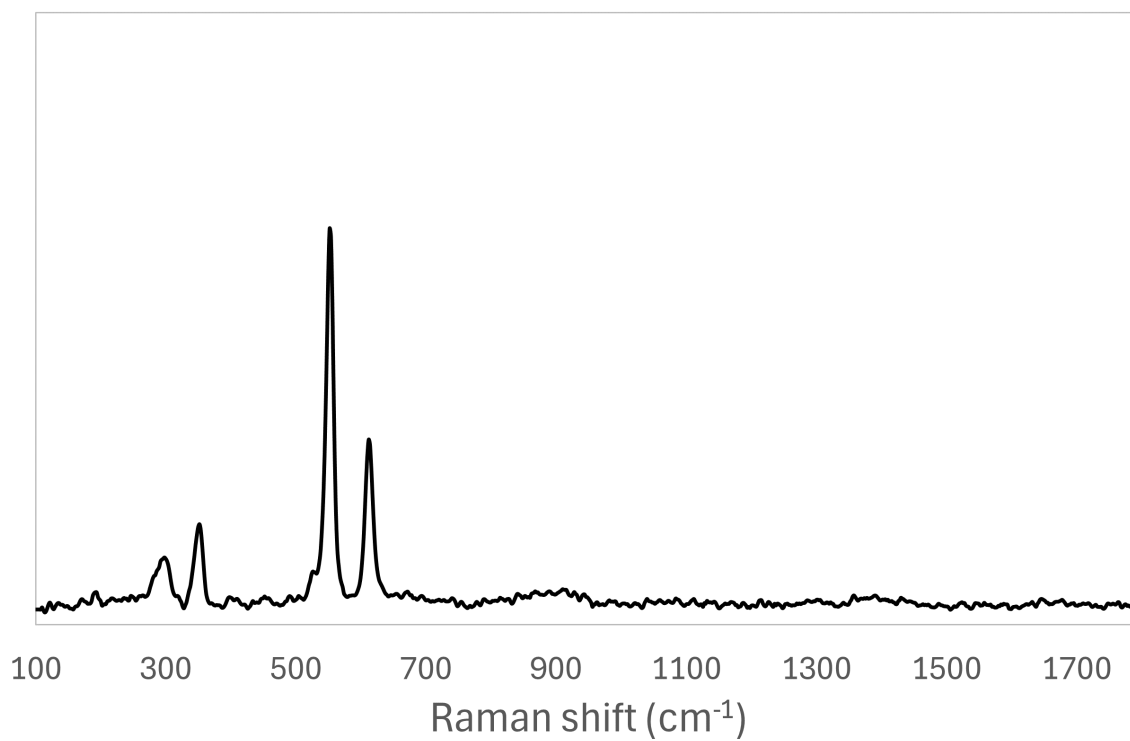

**Figure S69.** Raman spectrum of BioTek Green ink

Parameters used to obtain this data include the following: 785 nm, 175 mW, 5 second integration, 2 average, 1 boxcar, auto-baseline on. Peaks occurring at 614 cm<sup>-1</sup>, 554 cm<sup>-1</sup>, 352 cm<sup>-1</sup>, and 300 cm<sup>-1</sup> match peaks in chromium oxide green.<sup>1</sup>

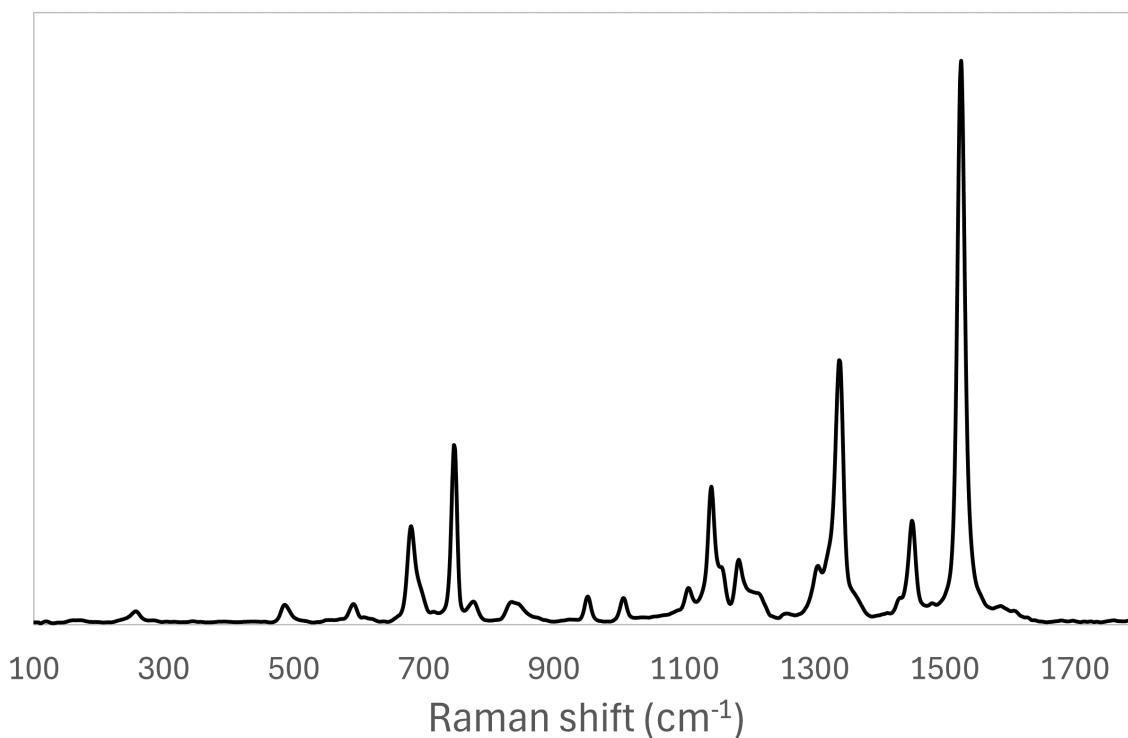

**Figure S70.** Raman spectrum of BioTek Deep Ocean ink

Parameters used to obtain this data include the following: 785 nm, 50 mW, 5 second integration, 2 average, 1 boxcar, auto-baseline on. Major peaks occurring at 1526 cm<sup>-1</sup>, 1450 cm<sup>-1</sup>, 1340 cm<sup>-1</sup>, 1142 cm<sup>-1</sup>, 746 cm<sup>-1</sup>, and 682 cm<sup>-1</sup> are characteristic of Pigment Blue 15.

### 3.6 Standard Pigments

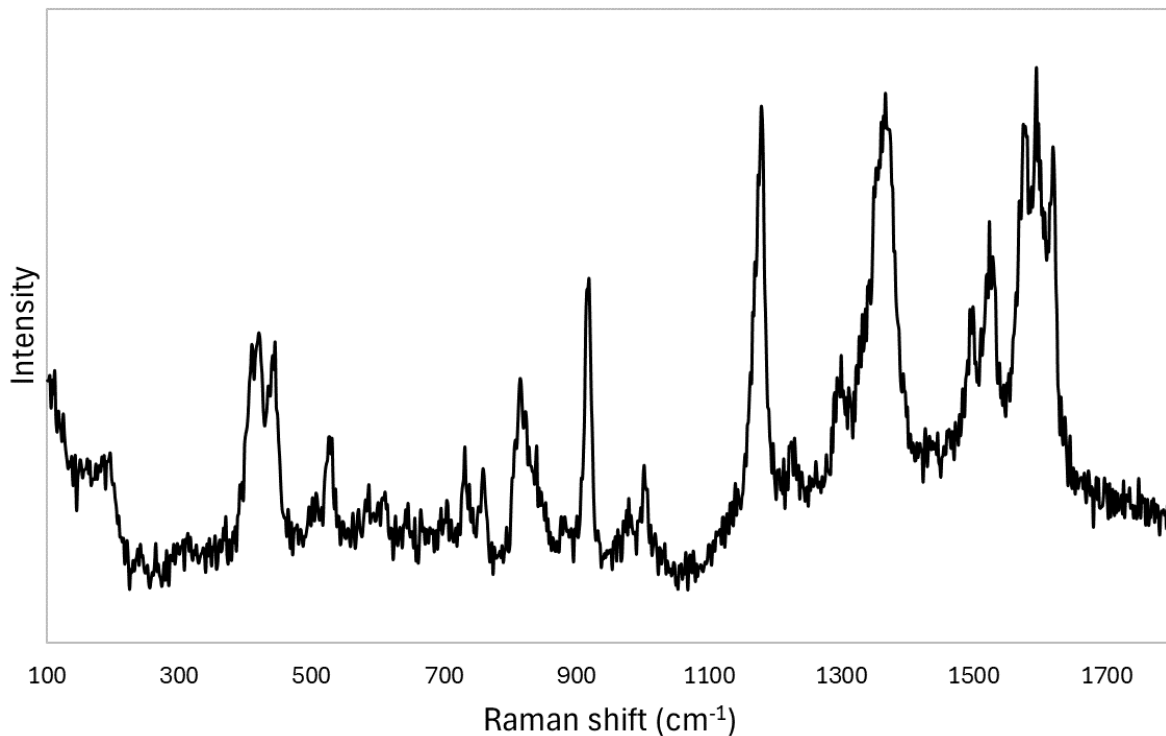

**Figure S71.** Raman spectrum of Alkali Blue (C.I. 42765) pigment

Parameters used to obtain this data include the following: 532 nm, 0.1%, 2 accumulations, 5 second integration. Major peaks occur at 1619  $\text{cm}^{-1}$ , 1594  $\text{cm}^{-1}$ , 1576  $\text{cm}^{-1}$ , 1523  $\text{cm}^{-1}$ , 1366  $\text{cm}^{-1}$ , 1179  $\text{cm}^{-1}$ , 1002  $\text{cm}^{-1}$ , 918  $\text{cm}^{-1}$ , 814  $\text{cm}^{-1}$ , 530  $\text{cm}^{-1}$ , 444  $\text{cm}^{-1}$ , and 419  $\text{cm}^{-1}$ .



## 4. XRF data

### 4.1 Intenze GenZ

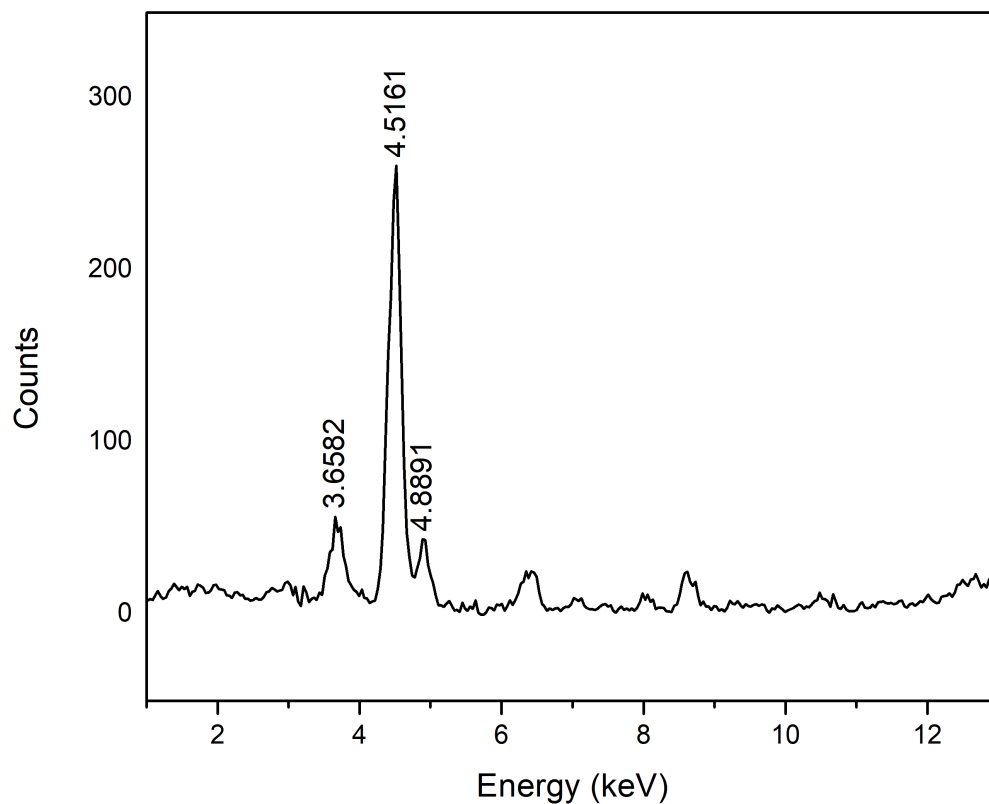

**Figure S72.** XRF spectrum of Intenze GenZ Light Grass ink

Peaks at 4.5161 keV and 4.8891 keV match the  $K_{\alpha 1}$  and  $K_{\beta 1}$  emission lines for titanium, supporting the presence of titanium dioxide (Pigment White 6). The peak at 3.6582 keV could correspond to the  $K_{\alpha 1}$  or  $L_{\alpha 1}$  emission line for calcium or tin, respectively, but there is no additional evidence that a calcium or tin-based pigment is present in the sample.

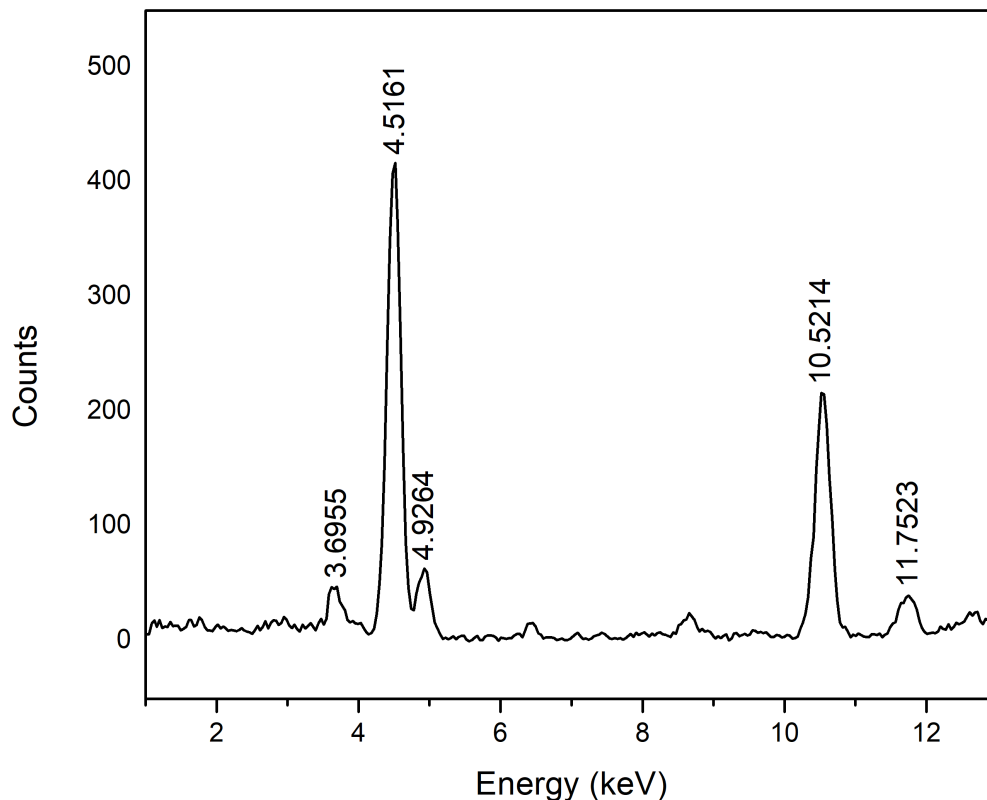

**Figure S73.** XRF spectrum of Intenze GenZ Blue Sky ink

Peaks at 4.5161 keV and 4.9264 keV suggest the presence of titanium, likely from Pigment White 6 ( $\text{TiO}_2$ ). The peak pair at 10.5214 keV and 11.7523 keV match the  $K_{\alpha 1}$  and  $K_{\beta 1}$  emission lines for arsenic, which is likely from the arsenic found in glass microscope slide that the sample was prepared on. The peak at 3.6955 keV matches emission lines for either calcium or tin but there is no other evidence of a pigment containing these elements in the tattoo ink.

## 4.2 Dynamic Viking

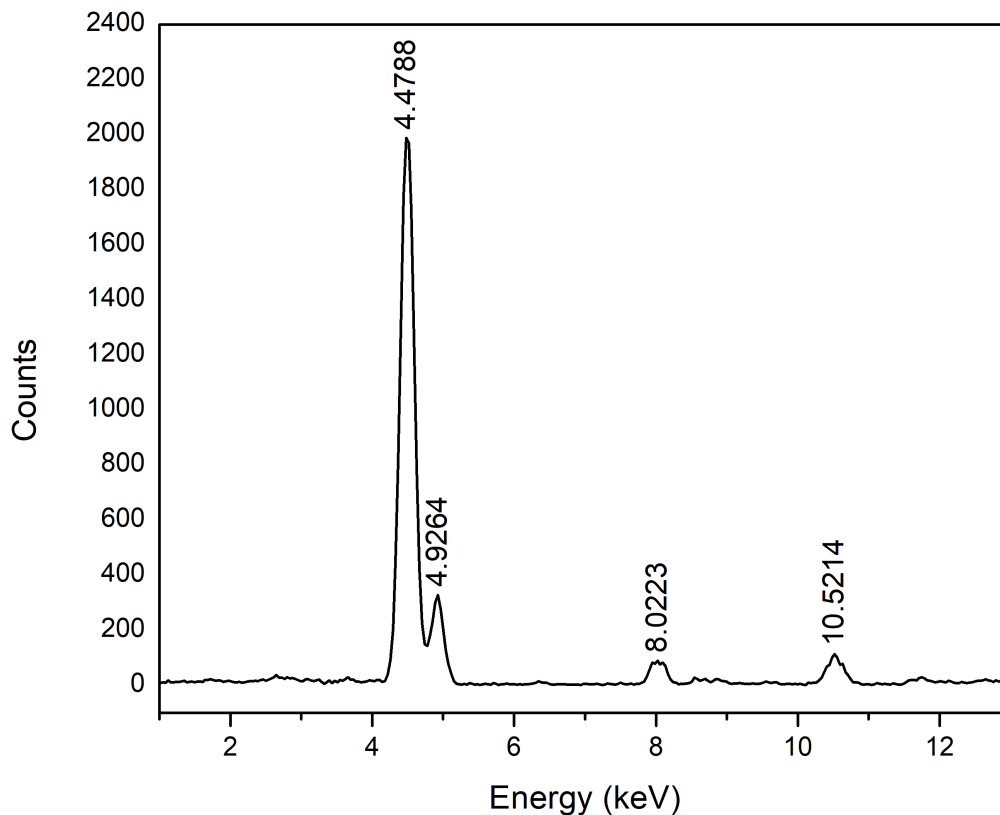

**Figure S74.** XRF spectrum of Dynamic Platinum Baby Blue ink

Peaks at 4.4788 keV and 4.9264 keV correspond to the  $K_{\alpha 1}$  and  $K_{\beta 1}$  emission lines of titanium, likely from Pigment White 6 ( $\text{TiO}_2$ ). The peak at 8.0223 keV is likely produced by a copper containing pigment, likely Pigment Green 7. The peak at 10.5214 keV is likely produced by arsenic found in the glass microscope slide that the sample was prepared on.

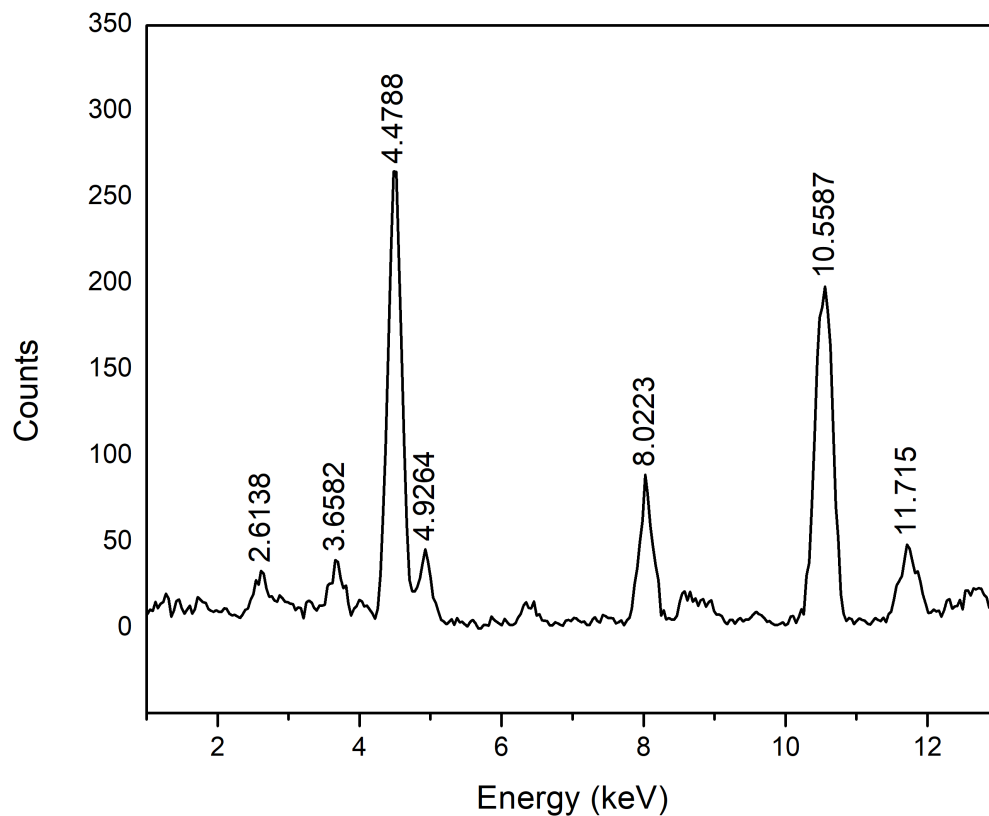

**Figure S75.** XRF spectrum of Dynamic Platinum Emerald Green ink

Peak pairings at 4.4788 keV and 4.9264 keV and at 8.0223 keV and 8.67 keV correspond to the  $K_{\alpha 1}$  and  $K_{\beta 1}$  emission lines of titanium and copper, respectively. This is likely due to the presence of titanium dioxide (Pigment White 6) and Pigment Green 7. There are additional peaks around 10.5 keV and 11.7 keV which is attributed to the arsenic found in the glass microscope slide that the sample was prepared on. Peaks at 2.6138 keV and 3.6582 keV match the  $K_{\alpha 1}$  emission lines for chlorine and calcium, respectively. Pigment Green 7 does contain chlorine, although there is no other evidence of any calcium containing pigments in this sample.

### 4.3 Quantum Ink

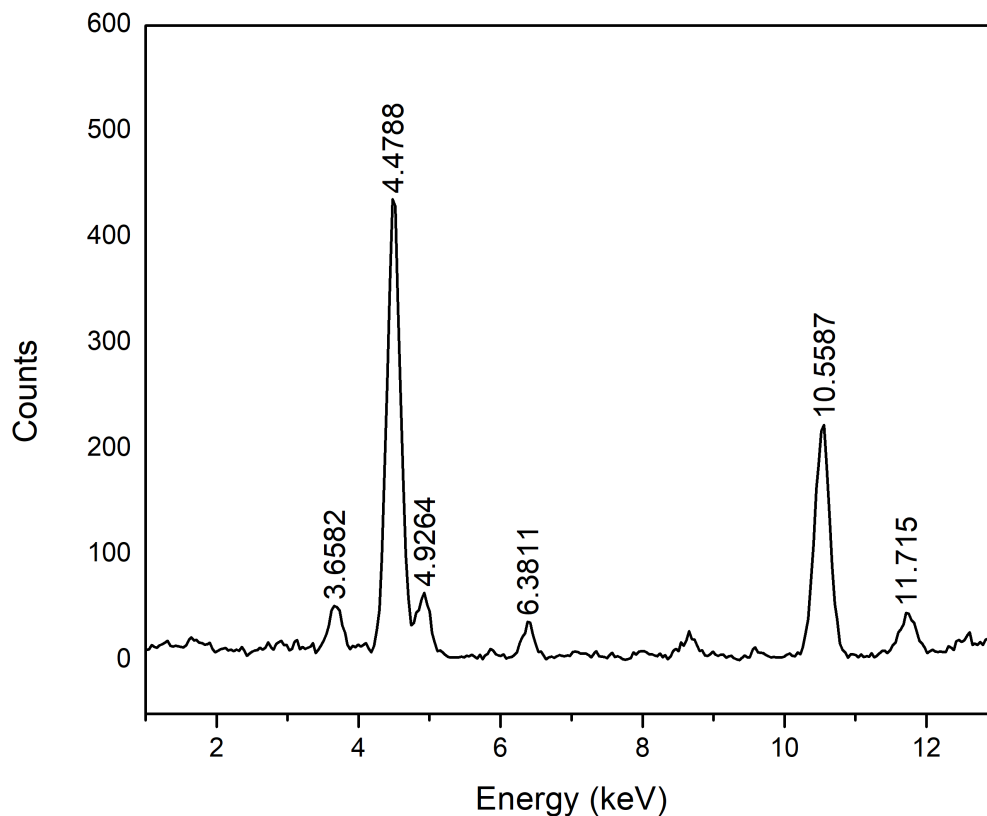

**Figure S76.** XRF spectrum of Quantum Ink Grover

A peak pair at 4.4788 keV and 4.9264 keV are attributed to titanium in the sample. This supports titanium dioxide (Pigment White 6) being present. Additionally, there is a peak pair around 10.5875 keV and 11.715 keV; this is due to the arsenic found in the glass microscope slide that the sample was prepared on. A small peak around 6.3811 keV may indicate a small amount of iron, likely from iron oxide. There is a small peak at 3.6582 keV which corresponds to the  $K_{\alpha 1}$  emission line of calcium, although there is no other evidence of a calcium-based pigment being present.

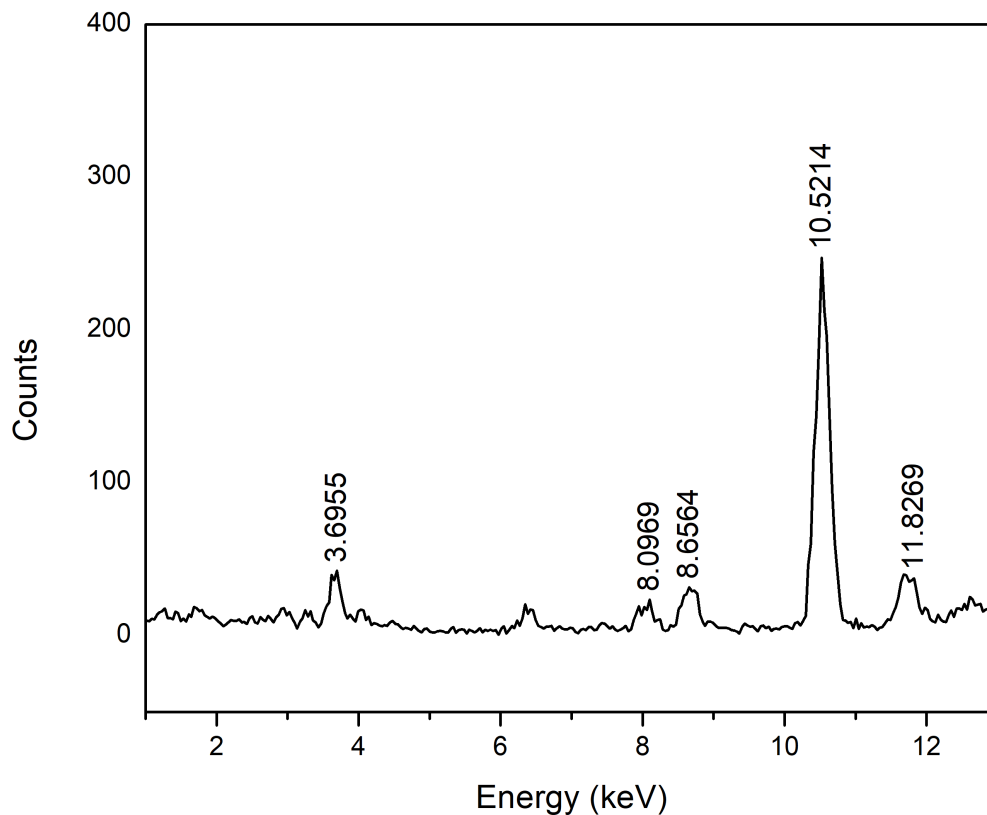

**Figure S77.** XRF spectrum of Quantum Ink Pickle Juice

Peaks at 8.0969 keV and 8.6564 keV is characteristic of copper, which supports Pigment Green 7 being present. A peak at 3.67 keV is typically characteristic of calcium, although no other evidence indicated a calcium-based pigment being present. There are peaks at 10.5214 keV and 11.8269 keV that correspond to arsenic; arsenic is commonly found in the glass microscope slides used to prepare this sample.

#### 4.4 Xtreme Ink

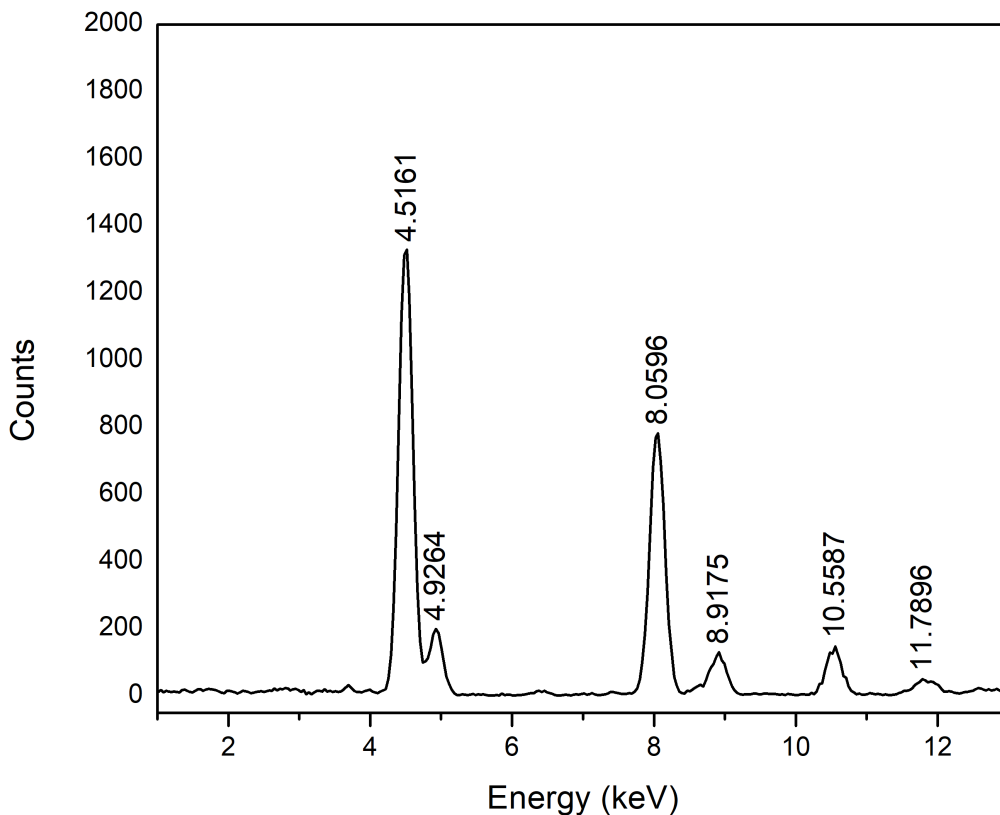

**Figure S78.** XRF spectrum of Xtreme Ink Azure

Peak pairs at 4.5161 keV and 4.9264 keV and at 8.0596 keV and 8.9175 keV correspond to  $K_{\alpha 1}$  and  $K_{\beta 1}$  emission lines of titanium and copper, respectively. The titanium is likely from titanium dioxide (Pigment White 6) while the copper is likely from Pigment Blue 15. Smaller peaks are present around 10.5 keV and 11.7 keV are attributed to arsenic present in the glass microscope slide that the sample was prepared on.

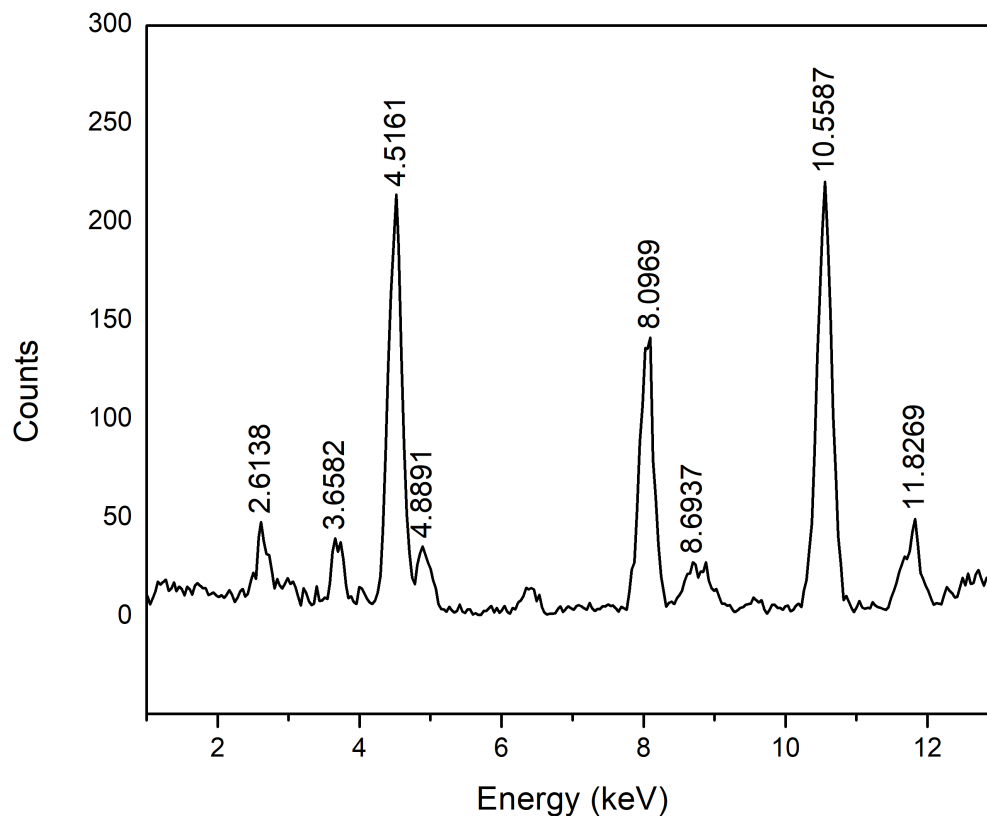

**Figure S79.** XRF spectrum of Xtreme Ink Lime Green

A peak pair at 4.5161 keV and 4.8891 keV corresponds to the  $K_{\alpha 1}$  and  $K_{\beta 1}$  emission lines of titanium, indicating that titanium dioxide (Pigment White 6) is present. There is another peak pair at 8.0969 keV and 8.6937 keV which indicates copper is present; this supports Pigment Green 7 being present. Additionally, a peak at 2.6138 keV may be produced by the  $K_{\alpha 1}$  emission line of chlorine, which is part of the Pigment Green 7 structure. There is also an arsenic peak pair at 10.5 keV and 11.7 keV, which comes from the glass microscope slide that the sample is prepared on. A peak at 3.6582 keV matches the  $K_{\alpha 1}$  emission line of calcium, although there is not other evidence of a calcium-based pigment in the ink.



#### 4.5 BioTek

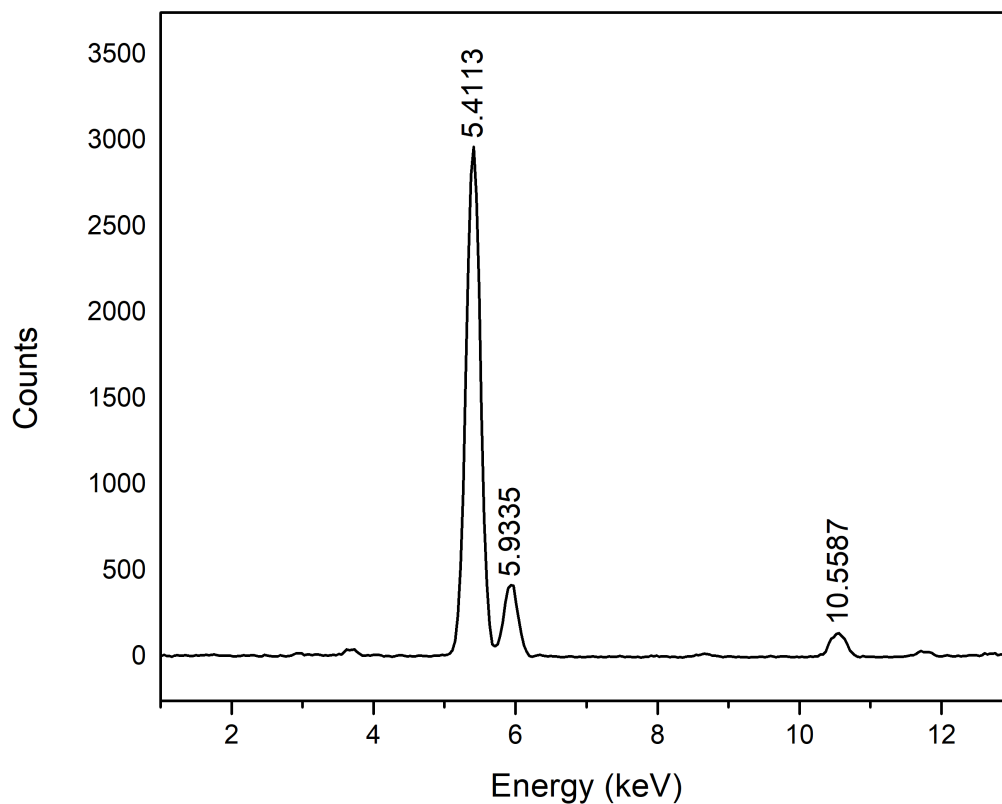

**Figure S80.** XRF spectrum of BioTek Green

The peaks at 5.4113 keV and 5.9335 keV correspond to the  $K_{\alpha 1}$  and  $K_{\beta 1}$  emission lines of chromium, supporting chromium oxide (C.I. 77288) being present in the tattoo ink. A peak at 10.5587 keV is from the  $K_{\alpha 1}$  emission line of arsenic, which is found in the glass microscope slide used to prepare the sample on.

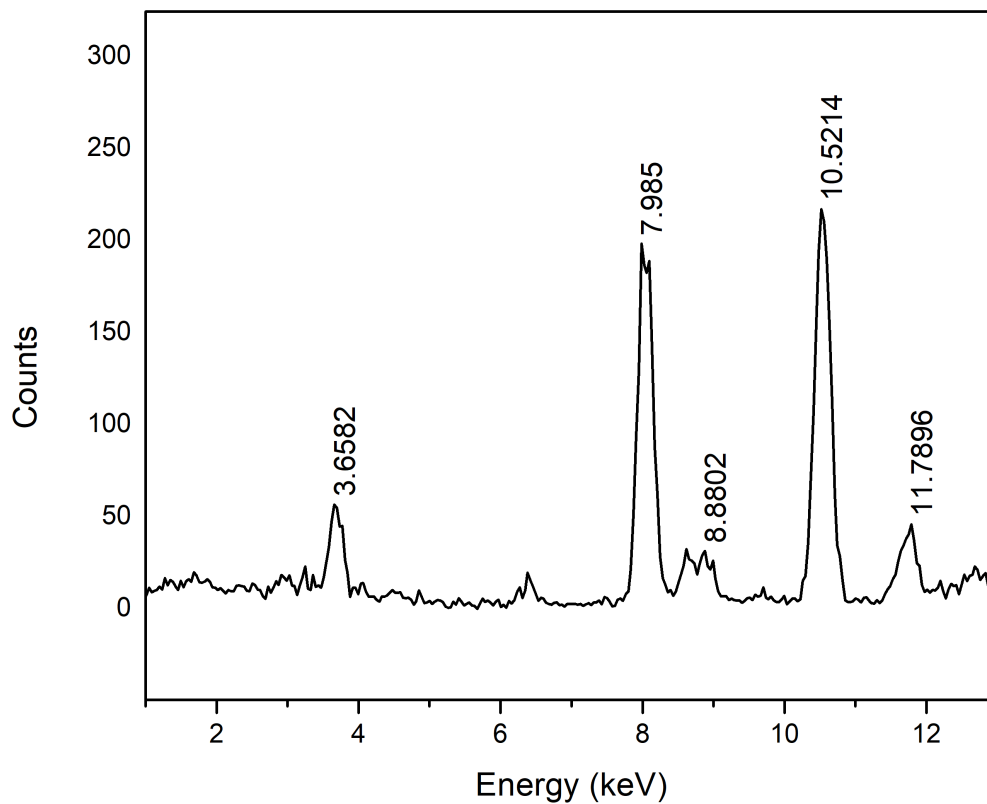

**Figure S81.** XRF spectrum of BioTek Deep Ocean

Peaks at 7.985 keV and 8.8802 keV correspond to copper's  $K_{\alpha 1}$  and  $K_{\beta 1}$  emission lines, supporting the presence of Pigment Blue 15. Peaks at 10.5214 keV and 11.7896 keV are from arsenic, which is found in the glass microscope slide that the sample was prepared on.

## References

1. Hardcastle, F. D., & Wachs, I. E. (1988). *Raman spectroscopy of chromium oxide supported on Al<sub>2</sub>O<sub>3</sub>, TiO<sub>2</sub> and SiO<sub>2</sub>: a comparative study.* *Journal of Molecular Catalysis*, 46(1-3), 173–186.
